# Supplementary material for: Synthesis of nitrogenated lignin-derived compounds and reactivity with laccases. Study of their application in mild chemoenzymatic oxidative processes
Source: Royal Society of Chemistry journal article supplement (doi:10.1039/c7ra10497a), 2017-01-01

# Synthesis of nitrogenated lignin-derived compounds and reactivity with laccases. Study of their application in mild chemoenzymatic oxidative processes

Jesús Albarrán-Velo,<sup>a</sup> María López-Iglesias,<sup>a</sup> Vicente Gotor,<sup>a</sup> Vicente Gotor-Fernández<sup>a,\*</sup> and Iván Lavandera<sup>a,\*</sup>

<sup>a</sup> Organic and Inorganic Chemistry Department, Biotechnology Institute of Asturias (IUBA), University of Oviedo, Avenida Julián Clavería 8, 33006 Oviedo, Spain

## SUPPORTING INFORMATION (page 1 of 82 pages)

### Table of Contents

|                                                                                                                          |            |
|--------------------------------------------------------------------------------------------------------------------------|------------|
| <b>1. Structures of compounds employed in this study.....</b>                                                            | <b>S2</b>  |
| <b>2. Chemical synthesis of 3,4-dihydroxybenzaldehyde (3c).....</b>                                                      | <b>S3</b>  |
| <b>3. Procedure for the control experiment of 6a with the denaturized protein.....</b>                                   | <b>S3</b>  |
| <b>4. Optimization study of veratryl alcohol (VA) oxidation.....</b>                                                     | <b>S3</b>  |
| <b>4.1. Optimization study of veratryl alcohol oxidation with natural compounds 3a and 3b.....</b>                       | <b>S4</b>  |
| <b>4.2. Optimization study of veratryl alcohol oxidation with vanillin-derived compounds 4a-9a.....</b>                  | <b>S6</b>  |
| <b>4.3. Optimization study of veratryl alcohol oxidation with syringyl-derived compounds 5b-9b.....</b>                  | <b>S11</b> |
| <b>4.4. Optimization study of veratryl alcohol oxidation with 3,4-dihydroxybenzaldehyde-derived compounds 5c-9c.....</b> | <b>S14</b> |
| <b>5. Analytics.....</b>                                                                                                 | <b>S17</b> |
| <b>6. Copy of <sup>1</sup>H, <sup>13</sup>C and DEPT NMR spectra.....</b>                                                | <b>S18</b> |

## 1. Structures of compounds employed in this study

The different derivatives synthesized from vanillin, syringaldehyde or 3,4-dihydroxybenzaldehyde are shown in Figure S1, as well as the 3,4-dihydroxybenzaldehyde (**3c**) and the 5-hydrazinyl-1*H*-tetrazole (**13**), which were also chemically prepared.

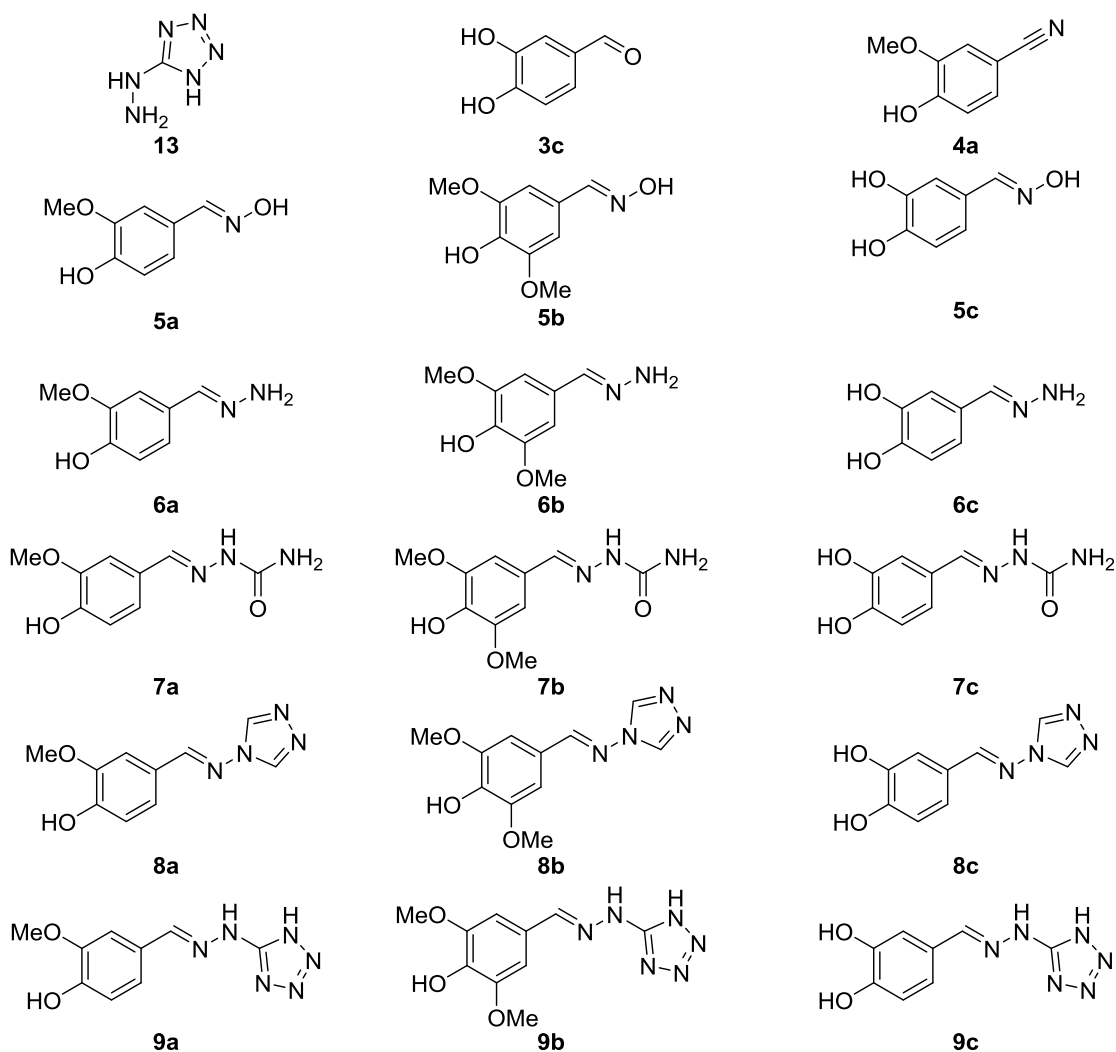

**Fig. S1.** Structures of compounds employed in this study.

## 2. Chemical synthesis of 3,4-dihydroxybenzaldehyde (3c)

3,4-Dihydroxybenzaldehyde (**3c**) was synthesized *via* demethylation of vanillin (Scheme S1) as previously described in J. Ravindran, G. V. Subbaraju, M. V. Ramani, B. Sung and B. B. Aggarwal, *Biochem. Pharmacol.*, 2010, **79**, 1658-1666.

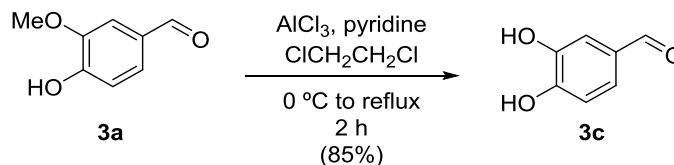

**Scheme S1.** Synthesis of 3,4-dihydroxybenzaldehyde (**3c**) from vanillin (**3a**).

**3,4-dihydroxybenzaldehyde (3c).** Aluminium chloride (1.53 g, 11.5 mmol) was added to a solution of **3a** (700 mg, 4.60 mmol) in ethylene dichloride (14 mL) at 0-5 °C. To the resulting suspension, pyridine (3.5 mL, 43.2 mmol) was added dropwise for 15 min, and the formed solution was stirred under reflux for 2 h. Then, a concentrated aqueous HCl solution was added (25 mL) at 0 °C, followed by addition of H<sub>2</sub>O (25 mL). The mixture was extracted with EtOAc (4 x 30 mL), the organic layers were combined, washed with H<sub>2</sub>O (3 x 20 mL), and dried over Na<sub>2</sub>SO<sub>4</sub>. The solvent was removed by distillation under reduced pressure and the reaction crude purified by column chromatography on silica gel (35% EtOAc/hexane) isolating the aldehyde **3c** in 85% yield.

<sup>1</sup>H NMR (300.13 MHz, MeOD-*d*<sub>4</sub>): δ 4.91 (br s, 1H), 6.91 (d, <sup>3</sup>J<sub>HH</sub> = 8.2 Hz, 1H), 7.29 (s, 1H), overlapped with 7.28-7.33 (m, 1H), 9.69 (s, 1H) ppm. <sup>13</sup>C NMR (75.5 MHz, MeOD-*d*<sub>4</sub>): δ 115.2 (CH), 116.2 (CH), 126.5 (CH), 130.7 (C), 147.0 (C), 153.6 (C), 193.1 (CH) ppm.

## 3. Procedure for the control experiment of 6a with the denaturated protein

In a test tube, a suspension of the LTv (25 U) in acetate buffer 100 mM pH 4.7 (2.7 mL) was shaken at 100 °C for 2 h. After this time the reaction was allowed to cool at 30 °C and the hydrazone **6a** dissolved in DMSO (300 μL, 10% v/v) was added. A balloon that was filled with oxygen was attached to the test tube and the mixture was stirred at 30 °C for 16 h. Then, the reaction was finished by extraction with EtOAc (3 x 2 mL), and the organic layers were combined and dried with Na<sub>2</sub>SO<sub>4</sub>. After solvent evaporation under reduced pressure, the reaction crude was analyzed by <sup>1</sup>H-NMR.

## 4. Optimization study of veratryl alcohol (VA) oxidation

The optimization study for vanillin, syringaldehyde and all the new synthesized compounds employed as potential mediators in the laccase-catalyzed veratryl alcohol (**1**) oxidation are detailed in the Tables S1 to S18.

#### 4.1. Optimization study of veratryl alcohol oxidation with natural compounds 3a and 3b

**Table S1.** Laccase-catalyzed VA oxidation using vanillin (**3a**) as mediator.<sup>a</sup>

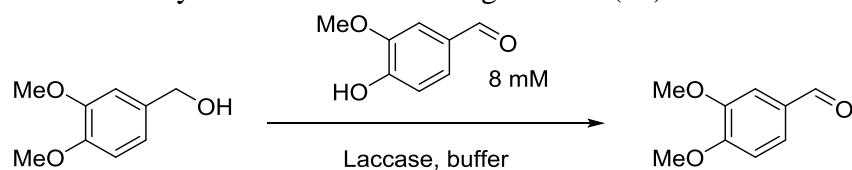

| Entry | Laccase | T (°C) | [VA] (mM) | t (h) | pH  | Conversion (%) <sup>b</sup> |
|-------|---------|--------|-----------|-------|-----|-----------------------------|
| 1     | LTv     | 30     | 3         | 48    | 4.7 | 2                           |
| 2     | LTv     | 30     | 3         | 48    | 5   | 4                           |
| 3     | LTv     | 30     | 3         | 72    | 5   | 4                           |
| 4     | LTv     | 30     | 10        | 72    | 5   | 1                           |
| 5     | LTv     | 30     | 15        | 72    | 5   | 1                           |
| 6     | LTv     | 30     | 20        | 72    | 5   | 1                           |
| 7     | LTv     | 30     | 3         | 48    | 6   | 1                           |
| 8     | Novozym | 50     | 3         | 48    | 5   | 4                           |
| 9     | Novozym | 50     | 3         | 48    | 6   | 6                           |
| 10    | Novozym | 50     | 3         | 72    | 6   | 6                           |
| 11    | Novozym | 50     | 10        | 72    | 6   | 3                           |
| 12    | Novozym | 50     | 15        | 72    | 6   | 3                           |
| 13    | Novozym | 50     | 20        | 72    | 6   | 3                           |
| 14    | Novozym | 50     | 3         | 48    | 7   | 4                           |

<sup>a</sup> Reaction conditions: **3a** (2.4 mg, 16  $\mu$ mol), buffer (2 mL), veratryl alcohol, laccase from *Trametes versicolor* (LTv, 25 U) or Novozym 51003 (31.4 U). For the buffers used: buffer acetate 100 mM pH 4.7; buffer citrate 50 mM pH 5; buffer citrate 50 mM pH 5.5; buffer citrate 50 mM pH 6; buffer phosphate 100 mM pH 7.

<sup>b</sup> Conversion values were determined by GC analysis after isolation of products by extraction under acidic media.

**Table S2.** Laccase-catalyzed VA oxidation using syringaldehyde (**3b**) as mediator.<sup>a</sup>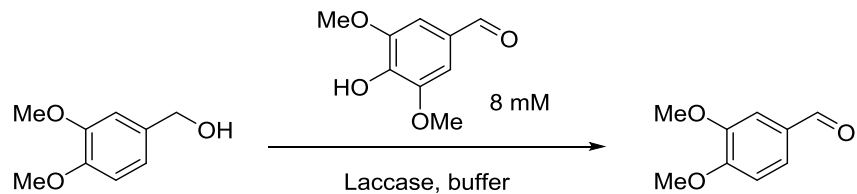

| Entry     | Laccase | T (°C) | [VA] (mM) | t (h) | pH  | Conversion (%) <sup>b</sup> |
|-----------|---------|--------|-----------|-------|-----|-----------------------------|
| <b>1</b>  | LTv     | 30     | 3         | 48    | 4.7 | 4                           |
| <b>2</b>  | LTv     | 30     | 3         | 48    | 5   | 4                           |
| <b>3</b>  | LTv     | 30     | 3         | 48    | 6   | 6                           |
| <b>4</b>  | LTv     | 30     | 3         | 72    | 6   | 5                           |
| <b>5</b>  | LTv     | 30     | 10        | 72    | 6   | 4                           |
| <b>6</b>  | LTv     | 30     | 15        | 72    | 6   | 5                           |
| <b>7</b>  | LTv     | 30     | 20        | 72    | 6   | 5                           |
| <b>8</b>  | Novozym | 50     | 3         | 48    | 5   | 7                           |
| <b>9</b>  | Novozym | 50     | 3         | 48    | 6   | 7                           |
| <b>10</b> | Novozym | 50     | 3         | 72    | 6   | 7                           |
| <b>11</b> | Novozym | 50     | 10        | 72    | 6   | 7                           |
| <b>12</b> | Novozym | 50     | 15        | 72    | 6   | 7                           |
| <b>13</b> | Novozym | 50     | 20        | 72    | 6   | 6                           |
| <b>14</b> | Novozym | 50     | 3         | 48    | 7   | 4                           |

<sup>a</sup> Reaction conditions: **3b** (2.9 mg, 16  $\mu$ mol), buffer (2 mL), veratryl alcohol, laccase from *Trametes versicolor* (LTv, 25 U) or Novozym 51003 (31.4 U). For the buffers used: buffer acetate 100 mM pH 4.7; buffer citrate 50 mM pH 5; buffer citrate 50 mM pH 5.5; buffer citrate 50 mM pH 6; buffer phosphate 100 mM pH 7.

<sup>b</sup> Conversion values were determined by GC analysis after isolation of products by extraction under acidic media.

## 4.2. Optimization study of veratryl alcohol oxidation with vanillin-derived compounds 4a-9a

**Table S3.** Laccase-catalyzed VA oxidation using 4-hydroxy-3-methoxybenzonitrile (**4a**) as potential mediator.<sup>a</sup>

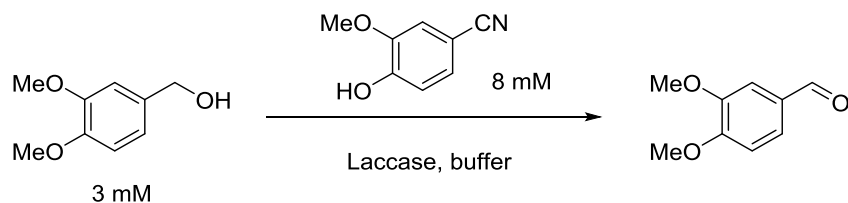

| Entry | Laccase | T (°C) | t (h) | pH  | Conversion (%) <sup>b</sup> |
|-------|---------|--------|-------|-----|-----------------------------|
| 1     | LTv     | 30     | 48    | 4.7 | 3                           |
| 2     | LTv     | 30     | 72    | 4.7 | 2                           |
| 3     | LTv     | 30     | 48    | 5   | <1                          |
| 4     | LTv     | 30     | 48    | 6   | 1                           |
| 5     | Novozym | 50     | 48    | 5   | 3                           |
| 6     | Novozym | 50     | 48    | 6   | 6                           |
| 7     | Novozym | 50     | 72    | 6   | 5                           |
| 8     | Novozym | 50     | 48    | 7   | 5                           |

<sup>a</sup> Reaction conditions: **4a** (2.4 mg, 16 μmol), buffer (2 mL), veratryl alcohol (0.9 μL, 6 μmol), laccase from *Trametes versicolor* (LTv, 25 U) or Novozym 51003 (31.4 U). For the buffers used: buffer acetate 100 mM pH 4.7; buffer citrate 50 mM pH 5; buffer citrate 50 mM pH 5.5; buffer citrate 50 mM pH 6; buffer phosphate 100 mM pH 7.

<sup>b</sup> Conversion values were determined by GC analysis after isolation of products by extraction under acidic media.

**Table S4.** Laccase-catalyzed VA oxidation using 4-hydroxy-3-methoxybenzaldehyde oxime (**5a**) as potential mediator.<sup>a</sup>

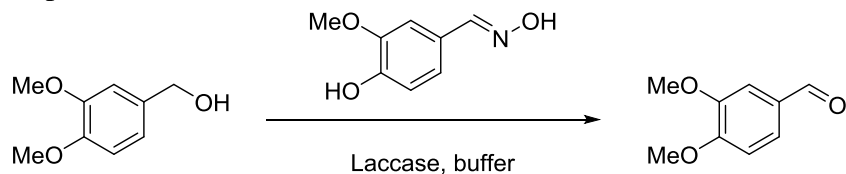

| Entry | Laccase | T (°C) | [Med] (mM) | [VA] (mM) | Cosolvent      | t (h) | pH  | Conversion (%) <sup>b</sup> |
|-------|---------|--------|------------|-----------|----------------|-------|-----|-----------------------------|
| 1     | LTv     | 30     | 4          | 3         | --             | 24    | 4.7 | 9                           |
| 2     | LTv     | 30     | 8          | 3         | --             | 24    | 4.7 | 10                          |
| 3     | LTv     | 30     | 8          | 3         | --             | 48    | 4.7 | 13                          |
| 4     | LTv     | 50     | 8          | 3         | --             | 48    | 4.7 | 13                          |
| 5     | LTv     | 30     | 8          | 3         | EtOH           | 48    | 4.7 | 9                           |
| 6     | LTv     | 30     | 8          | 3         | 1,4-Dioxane    | 48    | 4.7 | 9                           |
| 7     | LTv     | 30     | 8          | 3         | --             | 72    | 4.7 | 27                          |
| 8     | LTv     | 30     | 8          | 3         | --             | 48    | 5   | 20                          |
| 9     | LTv     | 30     | 8          | 3         | --             | 48    | 6   | 24                          |
| 10    | LTv     | 30     | 8          | 3         | MTBE           | 48    | 6   | 19                          |
| 11    | LTv     | 30     | 8          | 3         | <i>t</i> -BuOH | 48    | 6   | 14                          |
| 12    | LTv     | 30     | 8          | 3         | --             | 72    | 6   | 37                          |
| 13    | LTv     | 30     | 8          | 10        | --             | 72    | 6   | 17                          |
| 14    | LTv     | 30     | 8          | 15        | --             | 72    | 6   | 12                          |
| 15    | LTv     | 30     | 8          | 20        | --             | 72    | 6   | 10                          |
| 16    | LTv     | 30     | 8          | 3         | --             | 96    | 6   | 3                           |
| 17    | Novozym | 50     | 8          | 3         | --             | 48    | 5.5 | 26                          |
| 18    | Novozym | 50     | 8          | 3         | --             | 48    | 6   | 28                          |
| 19    | Novozym | 50     | 8          | 3         | --             | 48    | 7   | 24                          |
| 20    | Novozym | 50     | 8          | 3         | --             | 72    | 7   | 26                          |
| 21    | Novozym | 50     | 8          | 3         | --             | 72    | 6   | 34                          |
| 22    | Novozym | 50     | 8          | 3         | --             | 96    | 6   | 34                          |
| 23    | Novozym | 50     | 4          | 3         | --             | 96    | 6   | 23                          |
| 24    | Novozym | 50     | 8          | 10        | --             | 72    | 6   | 26                          |
| 25    | Novozym | 50     | 8          | 10        | --             | 96    | 6   | 27                          |
| 26    | Novozym | 50     | 8          | 15        | --             | 72    | 6   | 18                          |
| 27    | Novozym | 50     | 8          | 20        | --             | 72    | 6   | 14                          |

<sup>a</sup> Reaction conditions: **5a**, cosolvent (10% v/v), buffer (for a total volume of 2 mL), veratryl alcohol, laccase from *Trametes versicolor* (LTv, 25 U) or Novozym 51003 (31.4 U). For the buffers used: buffer acetate 100 mM pH 4.7; buffer citrate 50 mM pH 5; buffer citrate 50 mM pH 5.5; buffer citrate 50 mM pH 6; buffer phosphate 100 mM pH 7.

<sup>b</sup> Conversion values were determined by GC analysis after isolation of products by extraction under acidic media.

**Table S5.** Laccase-catalyzed VA oxidation using 4-(hydrazonomethyl)-2-methoxyphenol (**6a**) as potential mediator.<sup>a</sup>

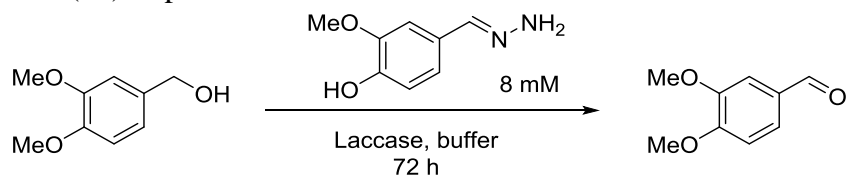

| Entry | Laccase | T (°C) | [VA] (mM) | Cosolvent | pH  | Conversion (%) <sup>b</sup> |
|-------|---------|--------|-----------|-----------|-----|-----------------------------|
| 1     | LTv     | 30     | 3         | DMSO      | 4.7 | 14                          |
| 2     | LTv     | 30     | 3         | DMSO      | 5   | 22                          |
| 3     | LTv     | 30     | 3         | DMSO      | 6   | 17                          |
| 4     | LTv     | 30     | 3         | --        | 4.7 | 39                          |
| 5     | LTv     | 30     | 10        | --        | 4.7 | 21                          |
| 6     | LTv     | 30     | 15        | --        | 4.7 | 12                          |
| 7     | LTv     | 30     | 20        | --        | 4.7 | 10                          |
| 8     | LTv     | 30     | 3         | --        | 5   | 3                           |
| 9     | LTv     | 30     | 3         | --        | 6   | 4                           |
| 10    | Novozym | 50     | 3         | DMSO      | 5   | 22                          |
| 11    | Novozym | 50     | 3         | DMSO      | 6   | 28                          |
| 12    | Novozym | 50     | 3         | DMSO      | 7   | 13                          |
| 13    | Novozym | 50     | 3         | --        | 5   | 32                          |
| 14    | Novozym | 50     | 3         | --        | 6   | 54                          |
| 15    | Novozym | 50     | 3         | --        | 7   | 48                          |
| 16    | Novozym | 50     | 10        | --        | 6   | 41                          |
| 17    | Novozym | 50     | 15        | --        | 6   | 26 <sup>c</sup>             |
| 18    | Novozym | 50     | 20        | --        | 6   | 18                          |

<sup>a</sup> Reaction conditions: **6a** (2.7 mg, 16  $\mu$ mol), DMSO (10% v/v), buffer (for a total volume of 2 mL), veratryl alcohol, laccase from *Trametes versicolor* (LTv, 25 U) or Novozym 51003 (31.4 U), 72 h. For the buffers used: buffer acetate 100 mM pH 4.7; buffer citrate 50 mM pH 5; buffer citrate 50 mM pH 5.5; buffer citrate 50 mM pH 6; buffer phosphate 100 mM pH 7.

<sup>b</sup> Conversion values were determined by GC analysis after isolation of products by extraction under acidic media.

<sup>c</sup> Conversion value corresponds to the average of duplicated reactions ( $\pm 5\%$ ).



**Table S6.** Laccase-catalyzed VA oxidation using 2-(4-hydroxy-3-methoxybenzylidene)hydrazine-1-carboxamide (**7a**) as potential mediator.<sup>a</sup>

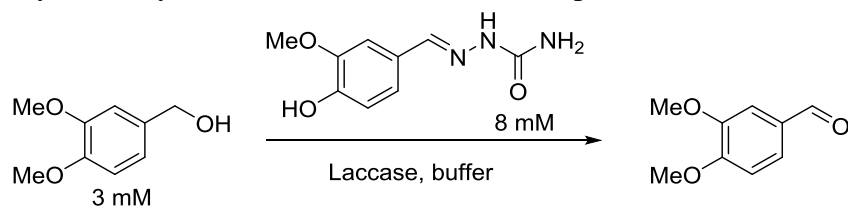

| Entry | Laccase | T (°C) | Cosolvent | t (h) | pH  | Conversion (%) <sup>b</sup> |
|-------|---------|--------|-----------|-------|-----|-----------------------------|
| 1     | LTv     | 30     | DMSO      | 72    | 4.7 | 5                           |
| 2     | LTv     | 30     | DMSO      | 72    | 5   | 6                           |
| 3     | LTv     | 30     | DMSO      | 72    | 6   | 8                           |
| 4     | LTv     | 30     | --        | 48    | 4.7 | 9                           |
| 5     | LTv     | 30     | --        | 72    | 4.7 | 14                          |
| 6     | LTv     | 30     | --        | 48    | 5   | 5                           |
| 7     | LTv     | 30     | --        | 48    | 6   | 9                           |
| 8     | LTv     | 30     | --        | 72    | 6   | 14                          |
| 9     | Novozym | 50     | DMSO      | 72    | 5   | 6                           |
| 10    | Novozym | 50     | DMSO      | 72    | 6   | 7                           |
| 11    | Novozym | 50     | DMSO      | 72    | 7   | 4                           |
| 12    | Novozym | 50     | --        | 72    | 5   | 11                          |
| 13    | Novozym | 50     | --        | 72    | 6   | 16                          |
| 14    | Novozym | 50     | --        | 72    | 7   | 13                          |

<sup>a</sup> Reaction conditions: **7a** (3.3 mg, 16  $\mu$ mol), DMSO (10% v/v), buffer (for a total volume of 2 mL), veratryl alcohol (0.9  $\mu$ L, 6  $\mu$ mol), laccase from *Trametes versicolor* (LTv, 25 U) or Novozym 51003 (31.4 U). For the buffers used: buffer acetate 100 mM pH 4.7; buffer citrate 50 mM pH 5; buffer citrate 50 mM pH 5.5; buffer citrate 50 mM pH 6; buffer phosphate 100 mM pH 7.

<sup>b</sup> Conversion values were determined by GC analysis after isolation of products by extraction under acidic media.

**Table S7.** Laccase-catalyzed VA oxidation using 4-(((4H-1,2,4-triazol-4-yl)imino)methyl)-2-methoxyphenol (**8a**) as potential mediator.<sup>a</sup>

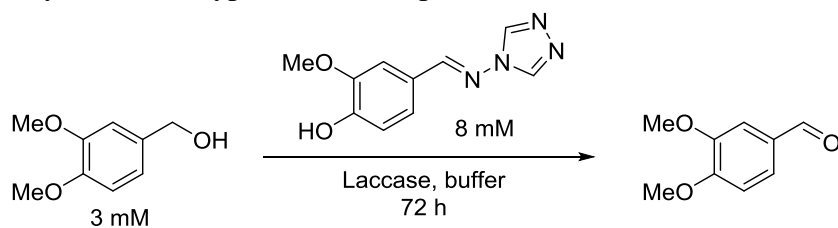

| Entry | Laccase | T (°C) | Cosolvent | pH  | Conversion (%) <sup>b</sup> |
|-------|---------|--------|-----------|-----|-----------------------------|
| 1     | LTv     | 30     | --        | 4.7 | 8                           |
| 2     | LTv     | 30     | DMSO      | 4.7 | 3                           |
| 3     | LTv     | 30     | --        | 5   | <1                          |
| 4     | LTv     | 30     | --        | 6   | <1                          |
| 5     | Novozym | 50     | --        | 5   | 4                           |
| 6     | Novozym | 50     | --        | 6   | 9                           |
| 7     | Novozym | 50     | DMSO      | 6   | 4                           |
| 8     | Novozym | 50     | --        | 7   | 4                           |

<sup>a</sup> Reaction conditions: **8a** (3.5 mg, 16  $\mu$ mol), DMSO (10% v/v), buffer (for a total volume of 2 mL), veratryl alcohol (0.9  $\mu$ L, 6  $\mu$ mol), laccase from *Trametes versicolor* (LTv, 25 U) or Novozym 51003 (31.4 U), 72 h. For the buffers used: buffer acetate 100 mM pH 4.7; buffer citrate 50 mM pH 5; buffer citrate 50 mM pH 5.5; buffer citrate 50 mM pH 6; buffer phosphate 100 mM pH 7.

<sup>b</sup> Conversion values were determined by GC analysis after isolation of products by extraction under acidic media.

**Table S8.** Laccase-catalyzed VA oxidation using 4-((2-(1*H*-tetrazol-5-yl)hydrazono)methyl)-2-methoxyphenol (**9a**) as potential mediator.<sup>a</sup>

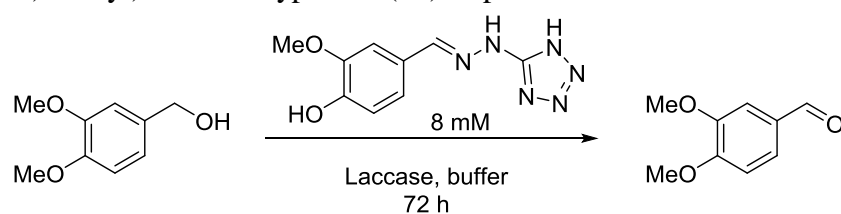

| Entry | Laccase | [VA] (mM) | T (°C) | pH  | Conversion (%) <sup>b</sup> |
|-------|---------|-----------|--------|-----|-----------------------------|
| 1     | LTv     | 3         | 30     | 4.7 | 7                           |
| 2     | LTv     | 3         | 30     | 5   | 15                          |
| 3     | LTv     | 3         | 30     | 6   | 39                          |
| 4     | LTv     | 3         | 30     | 7   | 25                          |
| 5     | LTv     | 10        | 30     | 6   | 20                          |
| 6     | LTv     | 15        | 30     | 6   | 13                          |
| 7     | LTv     | 20        | 30     | 6   | 13                          |
| 8     | Novozym | 3         | 50     | 5   | 5                           |
| 9     | Novozym | 3         | 50     | 6   | 24                          |
| 10    | Novozym | 3         | 50     | 7   | 13                          |
| 11    | Novozym | 10        | 50     | 6   | 10                          |
| 12    | Novozym | 15        | 50     | 6   | 16                          |
| 13    | Novozym | 20        | 50     | 6   | 15                          |

<sup>a</sup> Reaction conditions: **9a** (3.7 mg, 16  $\mu$ mol), buffer (2 mL), veratryl alcohol, laccase from *Trametes versicolor* (LTv, 25 U) or Novozym 51003 (31.4 U), 72 h. For the buffers used: buffer acetate 100 mM pH 4.7; buffer citrate 50 mM pH 5; buffer citrate 50 mM pH 5.5; buffer citrate 50 mM pH 6; buffer phosphate 100 mM pH 7.

<sup>b</sup> Conversion values were determined by GC analysis after isolation of products by extraction under acidic media.

### 4.3. Optimization study of veratryl alcohol oxidation with syringyl-derived compounds **5b-9b**

**Table S9.** Laccase-catalyzed VA oxidation using 4-hydroxy-3,5-dimethoxybenzaldehyde oxime (**5b**) as potential mediator.<sup>a</sup>

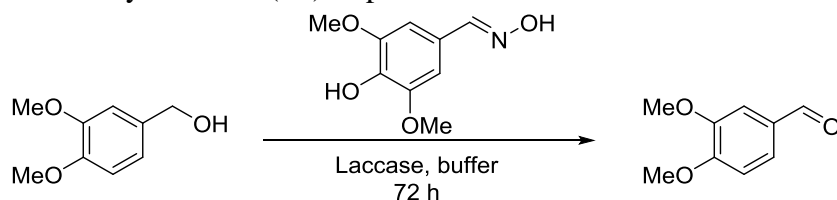

| Entry     | Laccase | T (°C) | [Med] (mM) | [VA] (mM) | pH  | Conversion (%) <sup>b</sup> |
|-----------|---------|--------|------------|-----------|-----|-----------------------------|
| <b>1</b>  | LTv     | 30     | 4          | 3         | 4.7 | 11                          |
| <b>2</b>  | LTv     | 30     | 8          | 3         | 5   | <1                          |
| <b>3</b>  | LTv     | 30     | 8          | 3         | 6   | 1                           |
| <b>4</b>  | Novozym | 50     | 8          | 3         | 5   | 19                          |
| <b>5</b>  | Novozym | 50     | 8          | 3         | 6   | 34                          |
| <b>6</b>  | Novozym | 50     | 8          | 3         | 7   | 35                          |
| <b>7</b>  | Novozym | 50     | 8          | 10        | 7   | 37                          |
| <b>8</b>  | Novozym | 50     | 12         | 3         | 7   | 36                          |
| <b>9</b>  | Novozym | 50     | 3          | 3         | 7   | 23                          |
| <b>10</b> | Novozym | 50     | 8          | 15        | 7   | 32 <sup>c</sup>             |
| <b>11</b> | Novozym | 50     | 8          | 20        | 7   | 31 <sup>c</sup>             |

<sup>a</sup> Reaction conditions: **5b**, buffer (2 mL), veratryl alcohol, laccase from *Trametes versicolor* (LTv, 25 U) or Novozym 51003 (31.4 U), 72 h. For the buffers used: buffer acetate 100 mM pH 4.7; buffer citrate 50 mM pH 5; buffer citrate 50 mM pH 5.5; buffer citrate 50 mM pH 6; buffer phosphate 100 mM pH 7.

<sup>b</sup> Conversion values were determined by GC analysis after isolation of products by extraction under acidic media.

<sup>c</sup> Conversion value corresponds to the average of duplicated reactions ( $\pm 4\%$ ).

**Table S10.** Laccase-catalyzed VA oxidation using 4-(hydrazonomethyl)-2,6-dimethoxyphenol (**6b**) as potential mediator.<sup>a</sup>

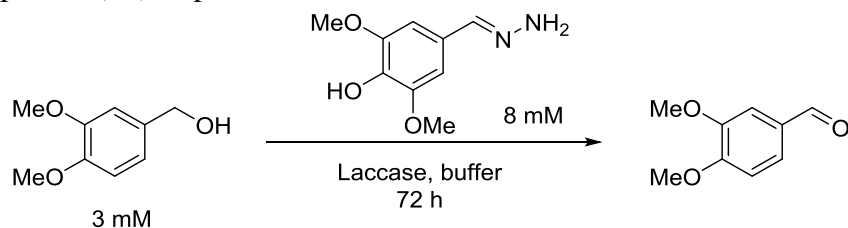

| Entry    | Laccase | T (°C) | pH  | Conversion (%) <sup>b</sup> |
|----------|---------|--------|-----|-----------------------------|
| <b>1</b> | LTv     | 30     | 4.7 | <1                          |
| <b>2</b> | LTv     | 30     | 5   | <1                          |
| <b>3</b> | LTv     | 30     | 6   | <1                          |
| <b>4</b> | Novozym | 50     | 5   | 3                           |
| <b>5</b> | Novozym | 50     | 6   | 3                           |
| <b>6</b> | Novozym | 50     | 7   | 3                           |

<sup>a</sup> Reaction conditions: **6b** (3.1 mg, 16  $\mu$ mol), buffer (2 mL), veratryl alcohol (0.9  $\mu$ L, 6  $\mu$ mol), laccase from *Trametes versicolor* (LTv, 25 U) or Novozym 51003 (31.4 U), 72 h. For the buffers used: buffer acetate 100 mM pH 4.7; buffer citrate 50 mM pH 5; buffer citrate 50 mM pH 5.5; buffer citrate 50 mM pH 6; buffer phosphate 100 mM pH 7.

<sup>b</sup> Conversion values were determined by GC analysis after isolation of products by extraction under acidic media.

**Table S11.** Laccase-catalyzed VA oxidation using 2-(4-hydroxy-3,5-dimethoxybenzylidene)hydrazine-1-carboxamide (**7b**) as potential mediator.<sup>a</sup>

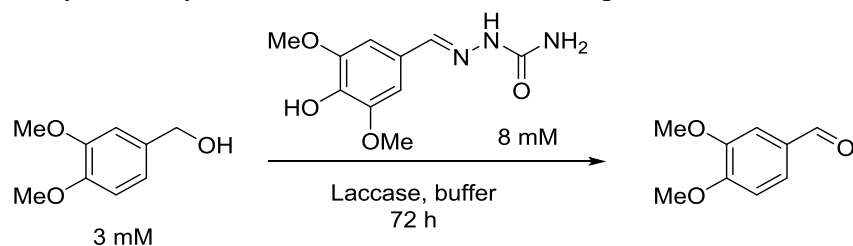

| Entry | Laccase | T (°C) | pH  | Conversion (%) <sup>b</sup> |
|-------|---------|--------|-----|-----------------------------|
| 1     | LTv     | 30     | 4.7 | 23                          |
| 2     | LTv     | 30     | 5   | <1                          |
| 3     | LTv     | 30     | 6   | <1                          |
| 4     | Novozym | 50     | 5   | 13                          |
| 5     | Novozym | 50     | 6   | 22                          |
| 6     | Novozym | 50     | 7   | 23                          |

<sup>a</sup> Reaction conditions: **7b** (3.8 mg, 16 μmol), buffer (2 mL), veratryl alcohol (0.9 μL, 6 μmol), laccase from *Trametes versicolor* (LTv, 25 U) or Novozym 51003 (31.4 U), 72 h. For the buffers used: buffer acetate 100 mM pH 4.7; buffer citrate 50 mM pH 5; buffer citrate 50 mM pH 5.5; buffer citrate 50 mM pH 6; buffer phosphate 100 mM pH 7.

<sup>b</sup> Conversion values were determined by GC analysis after isolation of products by extraction under acidic media.

**Table S12.** Laccase-catalyzed VA oxidation using 4-(((4H-1,2,4-triazol-4-yl)imino)methyl)-2,6-dimethoxyphenol (**8b**) as potential mediator.<sup>a</sup>

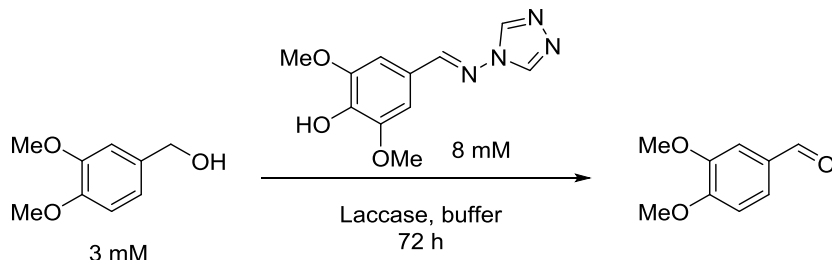

| Entry | Laccase | T (°C) | pH  | Conversion (%) <sup>b</sup> |
|-------|---------|--------|-----|-----------------------------|
| 1     | LTv     | 30     | 4.7 | 5                           |
| 2     | LTv     | 30     | 5   | <1                          |
| 3     | LTv     | 30     | 6   | <1                          |
| 4     | Novozym | 50     | 5   | 13                          |
| 5     | Novozym | 50     | 6   | 16                          |
| 6     | Novozym | 50     | 7   | 14                          |

<sup>a</sup> Reaction conditions: **8b** (4.0 mg, 16 μmol), buffer (2 mL), veratryl alcohol (0.9 μL, 6 μmol), laccase from *Trametes versicolor* (LTv, 25 U) or Novozym 51003 (31.4 U), 72 h. For the buffers used: buffer acetate 100 mM pH 4.7; buffer citrate 50 mM pH 5; buffer citrate 50 mM pH 5.5; buffer citrate 50 mM pH 6; buffer phosphate 100 mM pH 7.

<sup>b</sup> Conversion values were determined by GC analysis after isolation of products by extraction under acidic media.

**Table S13.** Laccase-catalyzed VA oxidation using 4-((2-(1*H*-tetrazol-5-yl)hydrazono)methyl)-2,6-dimethoxyphenol (**9b**) as potential mediator.<sup>a</sup>

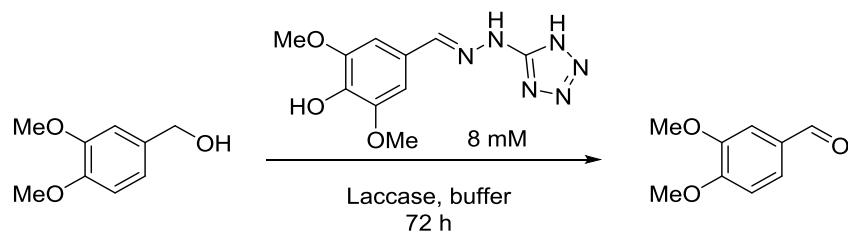

| Entry     | Laccase | [VA] (mM) | T (°C) | pH  | Conversion (%) <sup>b</sup> |
|-----------|---------|-----------|--------|-----|-----------------------------|
| <b>1</b>  | LTv     | 3         | 30     | 4.7 | 33                          |
| <b>2</b>  | LTv     | 3         | 30     | 5   | 36                          |
| <b>3</b>  | LTv     | 3         | 30     | 6   | 32                          |
| <b>4</b>  | LTv     | 10        | 30     | 5   | 18                          |
| <b>5</b>  | LTv     | 15        | 30     | 5   | 17                          |
| <b>6</b>  | LTv     | 20        | 30     | 5   | 14                          |
| <b>7</b>  | Novozym | 3         | 50     | 5   | 11                          |
| <b>8</b>  | Novozym | 3         | 50     | 6   | 32                          |
| <b>9</b>  | Novozym | 3         | 50     | 7   | 14                          |
| <b>10</b> | Novozym | 10        | 50     | 6   | 28                          |
| <b>11</b> | Novozym | 15        | 50     | 6   | 24                          |
| <b>12</b> | Novozym | 20        | 50     | 6   | 25 <sup>c</sup>             |

<sup>a</sup> Reaction conditions: **9b** (4.2 mg, 16  $\mu$ mol), buffer (2 mL), veratryl alcohol, laccase from *Trametes versicolor* (LTv, 25 U) or Novozym 51003 (31.4 U), 72 h. For the buffers used: buffer acetate 100 mM pH 4.7; buffer citrate 50 mM pH 5; buffer citrate 50 mM pH 5.5; buffer citrate 50 mM pH 6; buffer phosphate 100 mM pH 7.

<sup>b</sup> Conversion values were determined by GC analysis after isolation of products by extraction under acidic media.

<sup>c</sup> Conversion value corresponds to the average of duplicated reactions ( $\pm 1\%$ ).

#### 4.4. Optimization study of veratryl alcohol oxidation with 3,4-dihydroxybenzaldehyde-derived compounds 5c-9c

**Table S14.** Laccase-catalyzed VA oxidation using 3,4-dihydroxybenzaldehyde oxime (5c) as potential mediator.<sup>a</sup>

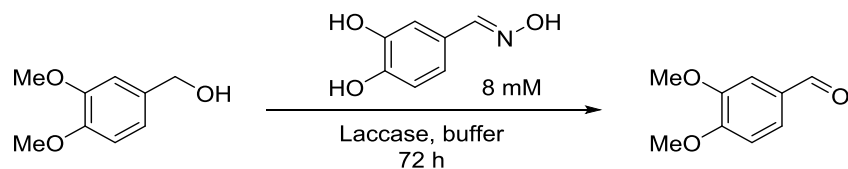

| Entry | Laccase | T (°C) | [VA] (mM) | pH  | Conversion (%) <sup>b</sup> |
|-------|---------|--------|-----------|-----|-----------------------------|
| 1     | LTv     | 30     | 3         | 4.7 | 48                          |
| 2     | LTv     | 30     | 3         | 5   | 70                          |
| 3     | LTv     | 30     | 3         | 6   | 67                          |
| 4     | LTv     | 30     | 10        | 5   | 52 <sup>c</sup>             |
| 5     | LTv     | 30     | 15        | 5   | 40 <sup>c</sup>             |
| 6     | LTv     | 30     | 20        | 5   | 30 <sup>c</sup>             |
| 7     | Novozym | 50     | 3         | 5   | 9                           |
| 8     | Novozym | 50     | 3         | 6   | 21                          |
| 9     | Novozym | 50     | 3         | 7   | 10                          |
| 10    | Novozym | 50     | 10        | 6   | 11                          |
| 11    | Novozym | 50     | 15        | 6   | 10                          |
| 12    | Novozym | 50     | 20        | 6   | 9                           |

<sup>a</sup> Reaction conditions: 5c (2.5 mg, 16  $\mu$ mol), buffer (2 mL), veratryl alcohol, laccase from *Trametes versicolor* (LTv, 25 U) or Novozym 51003 (31.4 U), 72 h. For the buffers used: buffer acetate 100 mM pH 4.7; buffer citrate 50 mM pH 5; buffer citrate 50 mM pH 5.5; buffer citrate 50 mM pH 6; buffer phosphate 100 mM pH 7.

<sup>b</sup> Conversion values were determined by GC analysis after isolation of products by extraction under acidic media.

<sup>c</sup> Conversion value corresponds to the average of duplicated reactions ( $\pm 5\%$ ).

**Table S15.** Laccase-catalyzed VA oxidation using 4-(hydrazonomethyl)benzene-1,2-diol (**6c**) as potential mediator.<sup>a</sup>

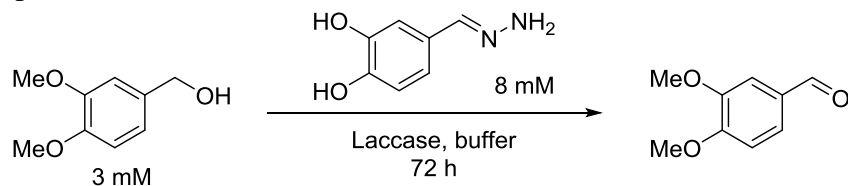

| Entry | Laccase | T (°C) | Cosolvent | pH  | Conversion (%) <sup>b</sup> |
|-------|---------|--------|-----------|-----|-----------------------------|
| 1     | LTv     | 30     | --        | 4.7 | 7                           |
| 2     | LTv     | 30     | --        | 5   | 7                           |
| 3     | LTv     | 30     | DMSO      | 5   | 6                           |
| 4     | LTv     | 30     | --        | 5.5 | 8                           |
| 5     | LTv     | 30     | --        | 6   | 7                           |
| 6     | Novozym | 50     | --        | 5   | 10                          |
| 7     | Novozym | 50     | DMSO      | 5   | 4                           |
| 8     | Novozym | 50     | --        | 6   | 8                           |
| 9     | Novozym | 50     | --        | 7   | 3                           |

<sup>a</sup> Reaction conditions: **6c** (2.4 mg, 16  $\mu$ mol), DMSO (10% v/v), buffer (for a total volume of 2 mL), veratryl alcohol (0.9  $\mu$ L, 6  $\mu$ mol), laccase from *Trametes versicolor* (LTv, 25 U) or Novozym 51003 (31.4 U), 72 h. For the buffers used: buffer acetate 100 mM pH 4.7; buffer citrate 50 mM pH 4.7; buffer citrate 50 mM pH 5.5; buffer citrate 50 mM pH 6; buffer phosphate 100 mM pH 7.

<sup>b</sup> Conversion values were determined by GC analysis after isolation of products by extraction under acidic media.

**Table S16.** Laccase-catalyzed VA oxidation using 2-(3,4-dihydroxybenzylidene)hydrazine-1-carboxamide (**7c**) as potential mediator.<sup>a</sup>

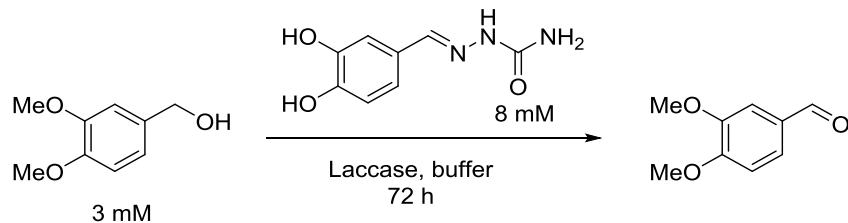

| Entry | Laccase | T (°C) | pH  | Conversion (%) <sup>b</sup> |
|-------|---------|--------|-----|-----------------------------|
| 1     | LTv     | 30     | 4.7 | 8                           |
| 2     | LTv     | 30     | 5   | <1                          |
| 3     | LTv     | 30     | 6   | 6                           |
| 4     | Novozym | 50     | 5   | 5                           |
| 5     | Novozym | 50     | 6   | 4                           |
| 6     | Novozym | 50     | 7   | <1                          |

<sup>a</sup> Reaction conditions: **7c** (3.1 mg, 16  $\mu$ mol), buffer (2 mL), veratryl alcohol (0.9  $\mu$ L, 6  $\mu$ mol), laccase from *Trametes versicolor* (LTv, 25 U) or Novozym 51003 (31.4 U), 72 h. For the buffers used: buffer acetate 100 mM pH 4.7; buffer citrate 50 mM pH 5; buffer citrate 50 mM pH 5.5; buffer citrate 50 mM pH 6; buffer phosphate 100 mM pH 7.

<sup>b</sup> Conversion values were determined by GC analysis after isolation of products by extraction under acidic media.

**Table S17.** Laccase-catalyzed VA oxidation using 4-(((4*H*-1,2,4-triazol-4-yl)imino)methyl)benzene-1,2-diol (**8c**) as potential mediator.<sup>a</sup>

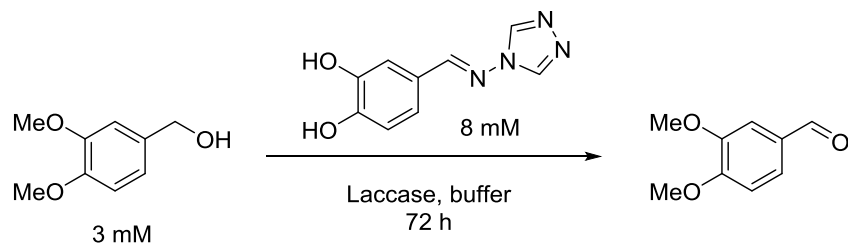

| Entry | Laccase | T (°C) | pH  | Conversion (%) <sup>b</sup> |
|-------|---------|--------|-----|-----------------------------|
| 1     | LTv     | 30     | 4.7 | 4                           |
| 2     | LTv     | 30     | 5   | <1                          |
| 3     | LTv     | 30     | 6   | <1                          |
| 4     | Novozym | 50     | 5   | 2                           |
| 5     | Novozym | 50     | 6   | 2                           |
| 6     | Novozym | 50     | 7   | 1                           |

<sup>a</sup> Reaction conditions: **8c** (3.3 mg, 16 μmol), buffer (2 mL), veratryl alcohol (0.9 μL, 6 μmol), laccase from *Trametes versicolor* (LTv, 25 U) or Novozym 51003 (31.4 U), 72 h. For the buffers used: buffer acetate 100 mM pH 4.7; buffer citrate 50 mM pH 5; buffer citrate 50 mM pH 5.5; buffer citrate 50 mM pH 6; buffer phosphate 100 mM pH 7.

<sup>b</sup> Conversion values were determined by GC analysis after isolation of products by extraction under acidic media.

**Table S18.** Laccase-catalyzed VA oxidation using 4-((2-(1*H*-tetrazol-5-yl)hydrazono)methyl)benzene-1,2-diol (**9c**) as potential mediator.<sup>a</sup>

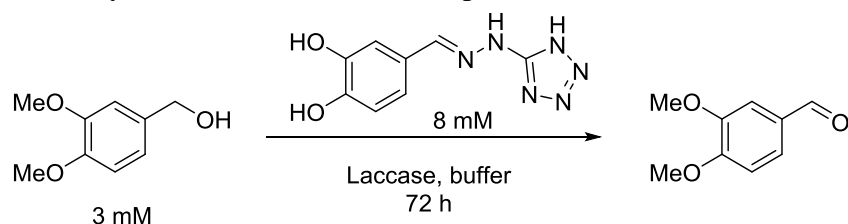

| Entry | Laccase | T (°C) | pH  | Conversion (%) <sup>b</sup> |
|-------|---------|--------|-----|-----------------------------|
| 1     | LTv     | 30     | 4.7 | 11                          |
| 2     | LTv     | 30     | 5   | 11                          |
| 3     | LTv     | 30     | 6   | 9                           |
| 4     | Novozym | 50     | 5   | 2                           |
| 5     | Novozym | 50     | 6   | 3                           |
| 6     | Novozym | 50     | 7   | 1                           |

<sup>a</sup> Reaction conditions: **9c** (3.5 mg, 16 μmol), buffer (2 mL), veratryl alcohol (0.9 μL, 6 μmol), laccase from *Trametes versicolor* (LTv, 25 U) or Novozym 51003 (31.4 U), 72 h. For the buffers used: buffer acetate 100 mM pH 4.7; buffer citrate 50 mM pH 5; buffer citrate 50 mM pH 5.5; buffer citrate 50 mM pH 6; buffer phosphate 100 mM pH 7.

<sup>b</sup> Conversion values were determined by GC analysis after isolation of products by extraction under acidic media.



## 5. Analytics

Gas chromatography analyses (GC) were carried out for monitoring the laccase-catalyzed oxidation of veratryl alcohol (**1**). An Agilent 7890A GC-apparatus and a chiral stationary phase HP-1 column (30 m x 0.320 mm x 0.25  $\mu$ m) were used for the measurement of reaction conversion values. The conditions are shown in Table S19.

**Table S19.** Analytical conditions for the GC measurement of conversions values in the enzymatic oxidation of **1**.

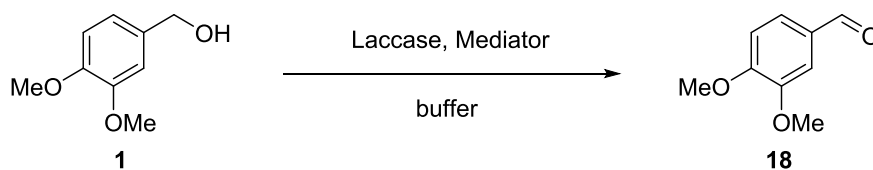

| Compound  | Temperature program                                                       | $t_R$ (min) |
|-----------|---------------------------------------------------------------------------|-------------|
| <b>1</b>  | 90 °C (0 min), 10 °C/min until 200 °C (0 min), 40 °C until 300 °C (0 min) | 6.2         |
| <b>18</b> | 90 °C (0 min), 10 °C/min until 200 °C (0 min), 40 °C until 300 °C (0 min) | 6.6         |

## 6. Copy of $^1\text{H}$ , $^{13}\text{C}$ and DEPT NMR spectra

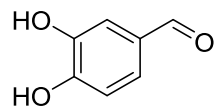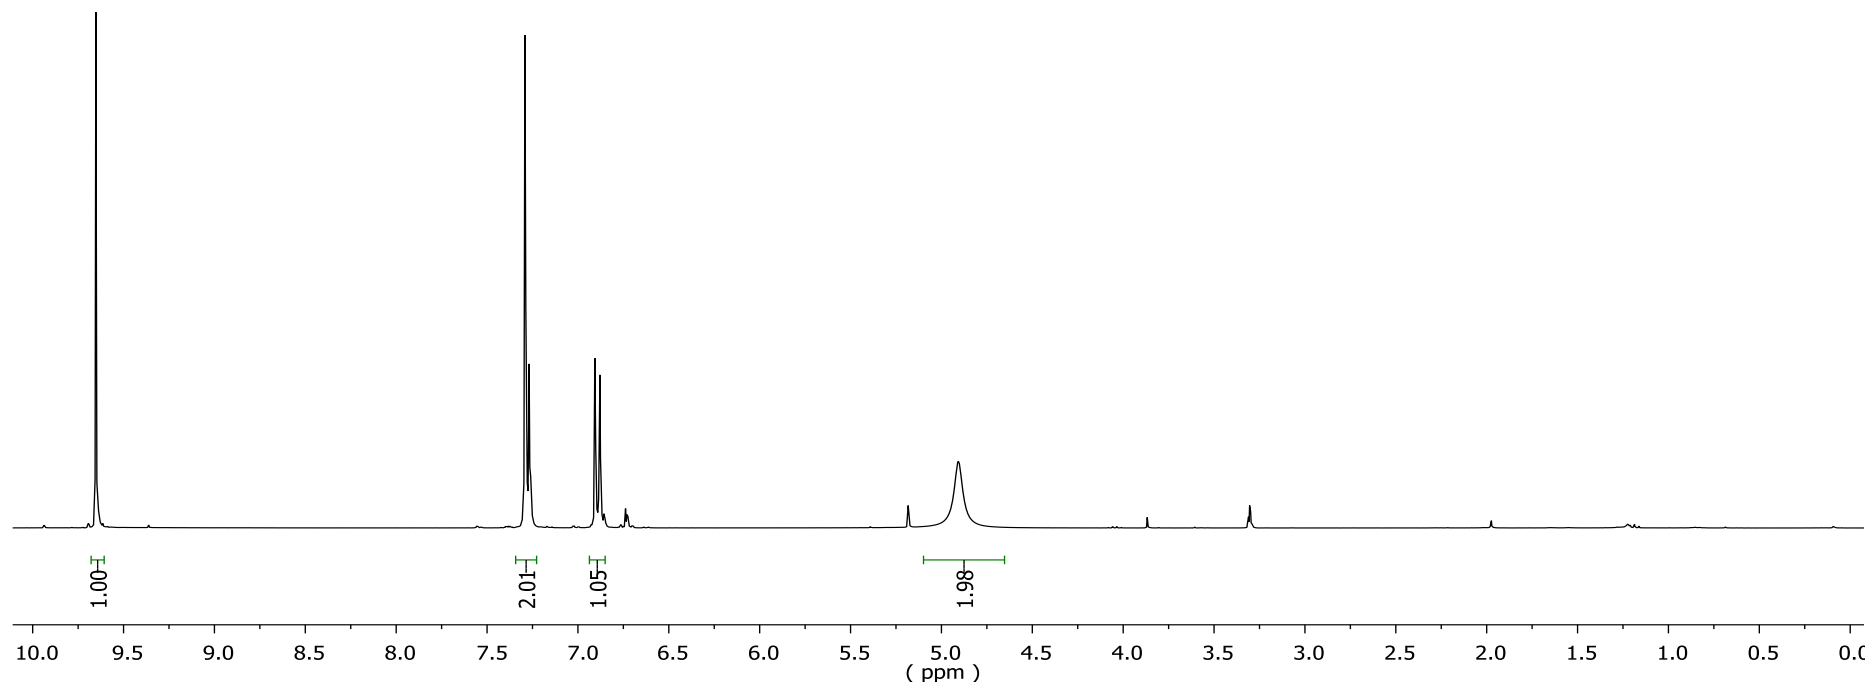

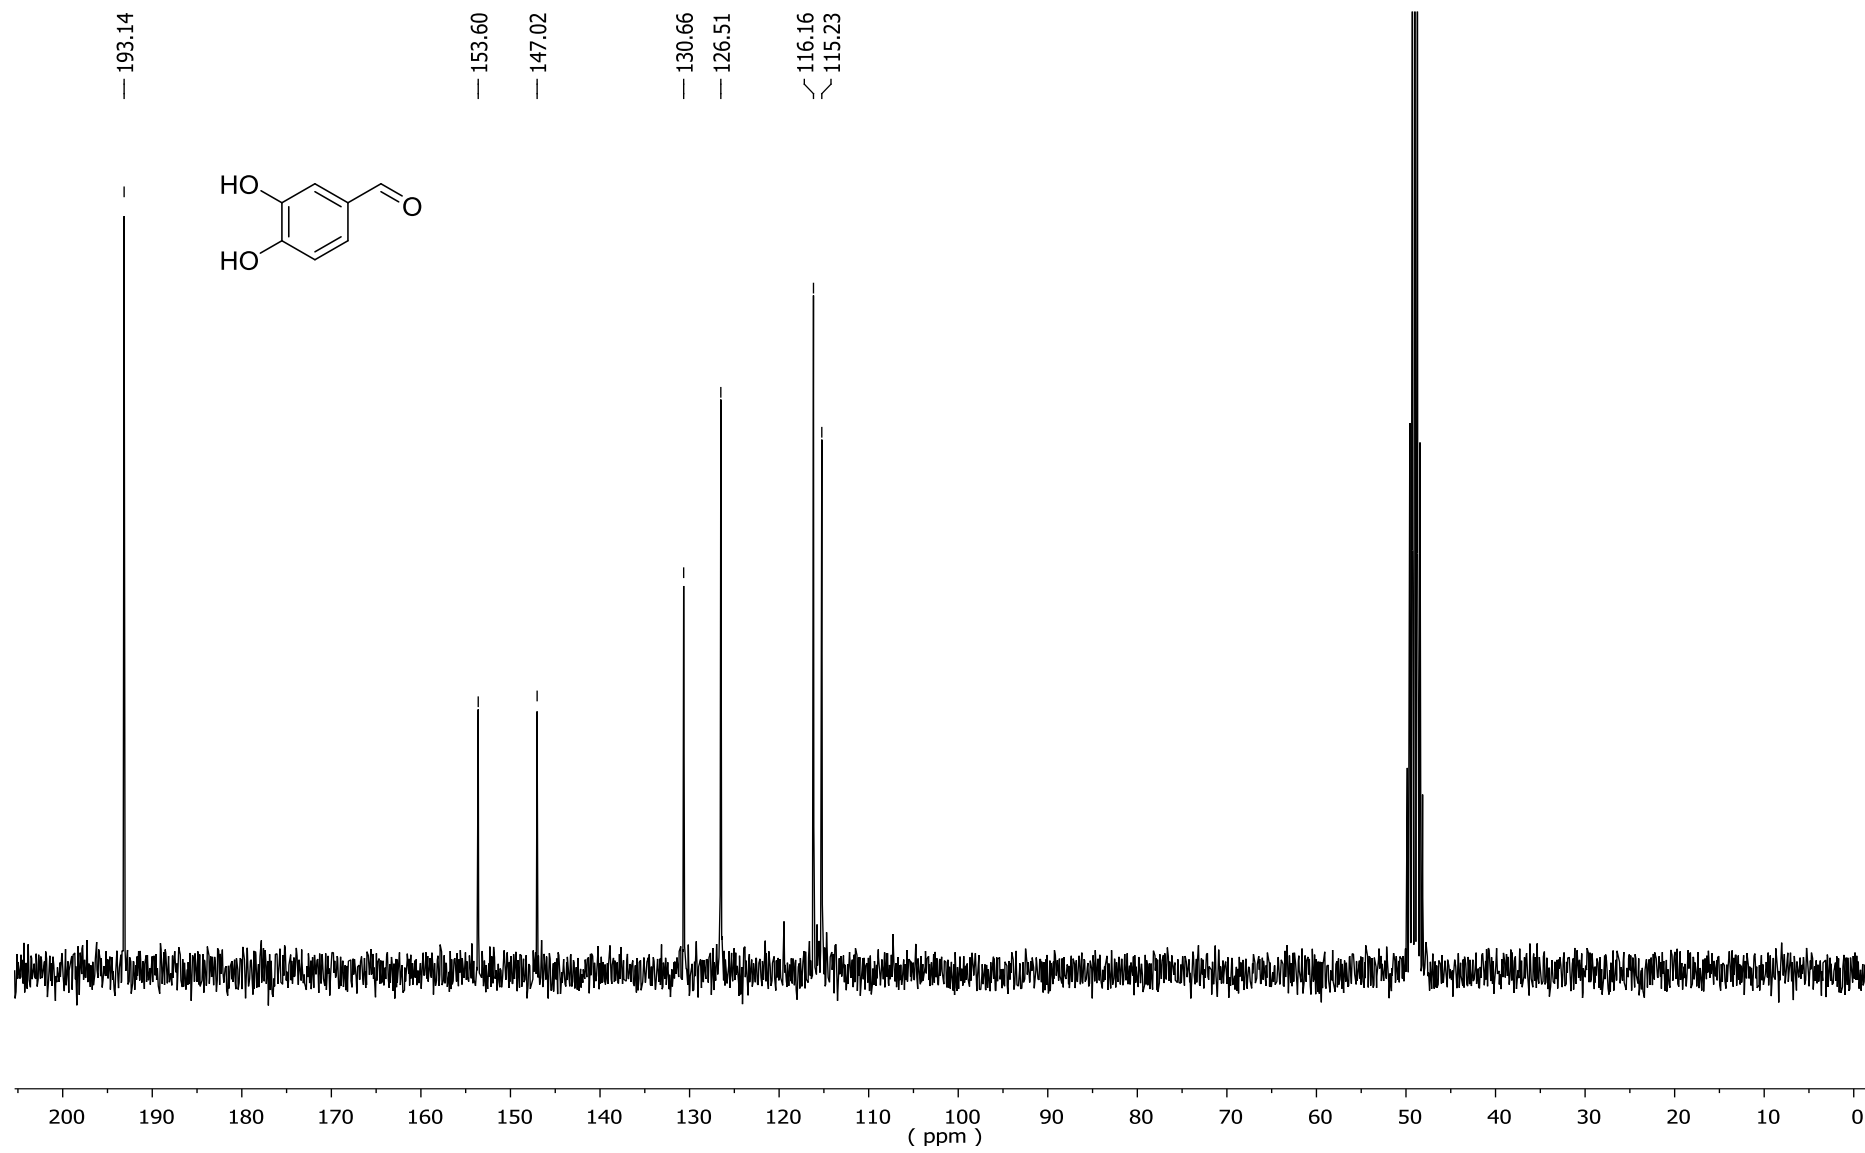

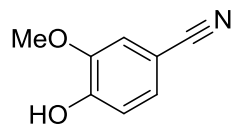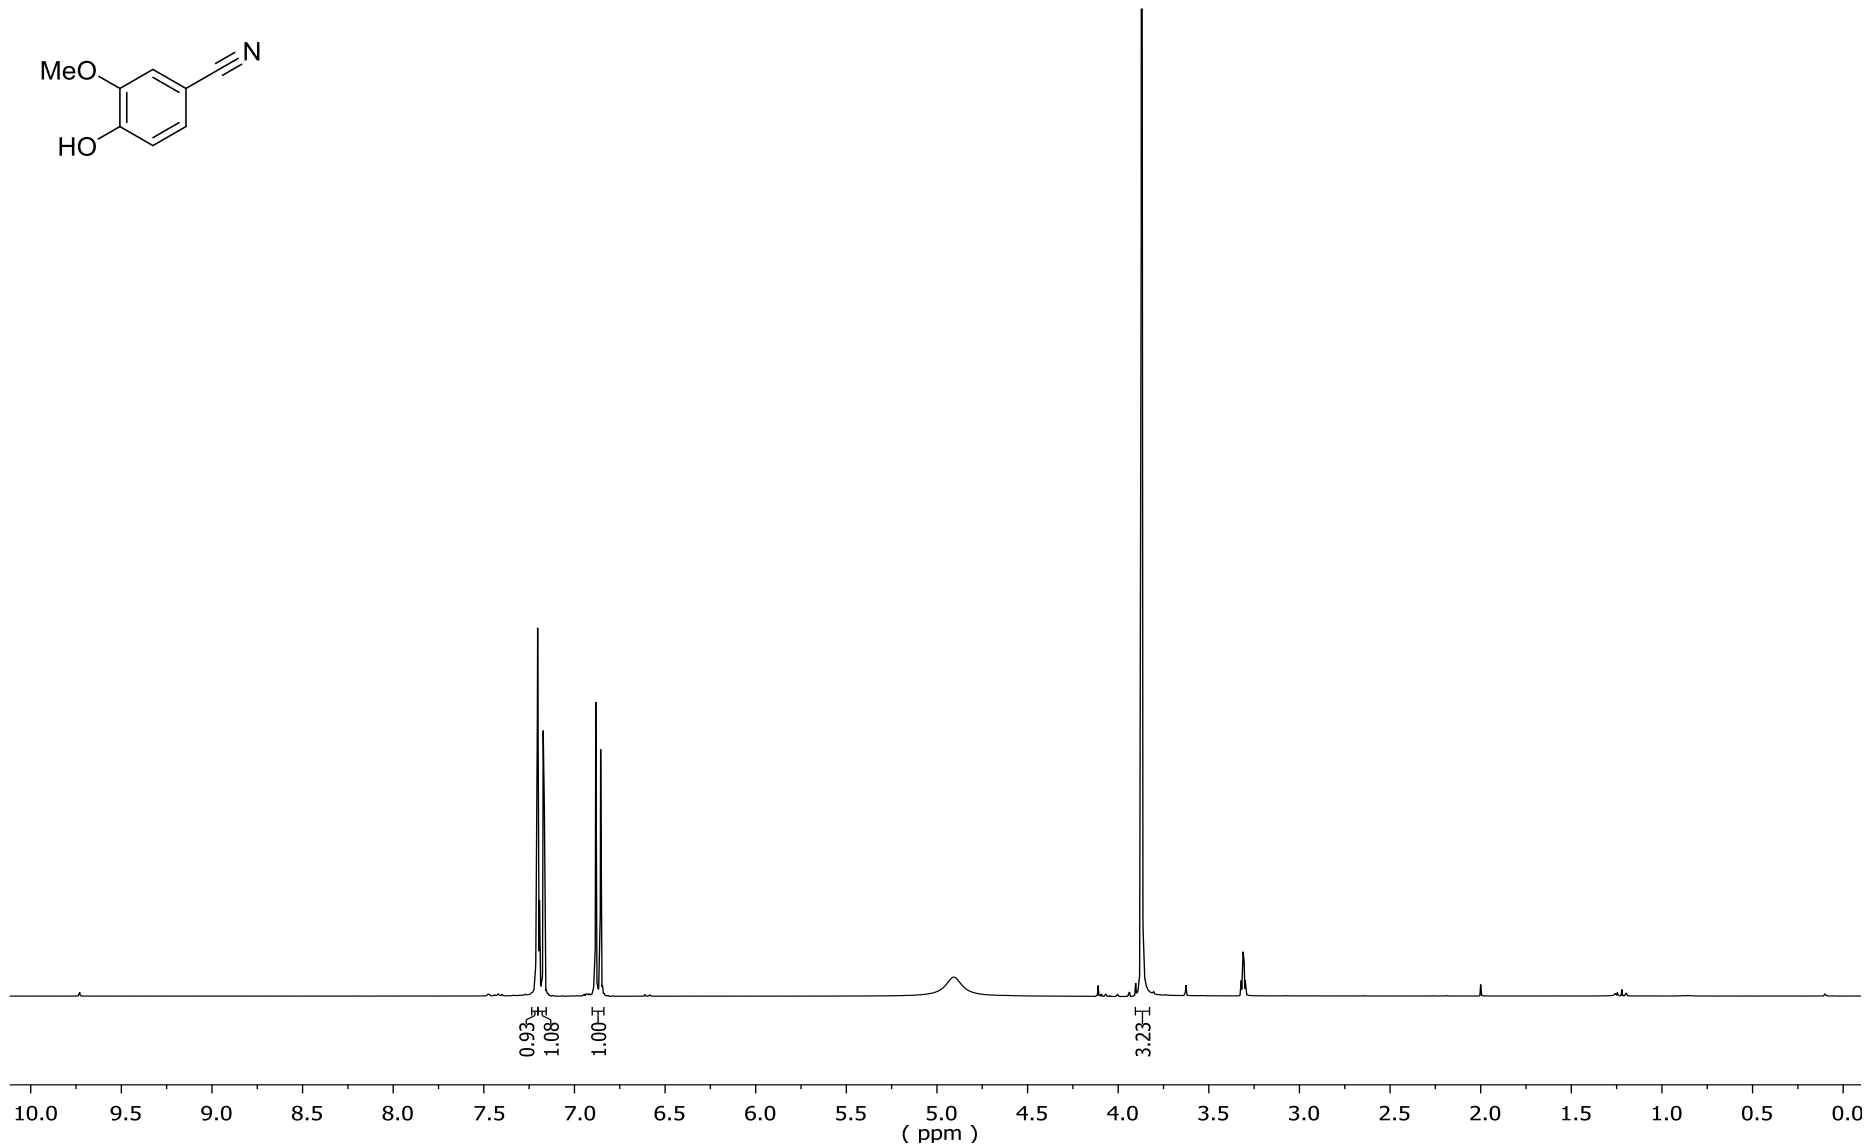

S20

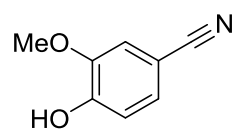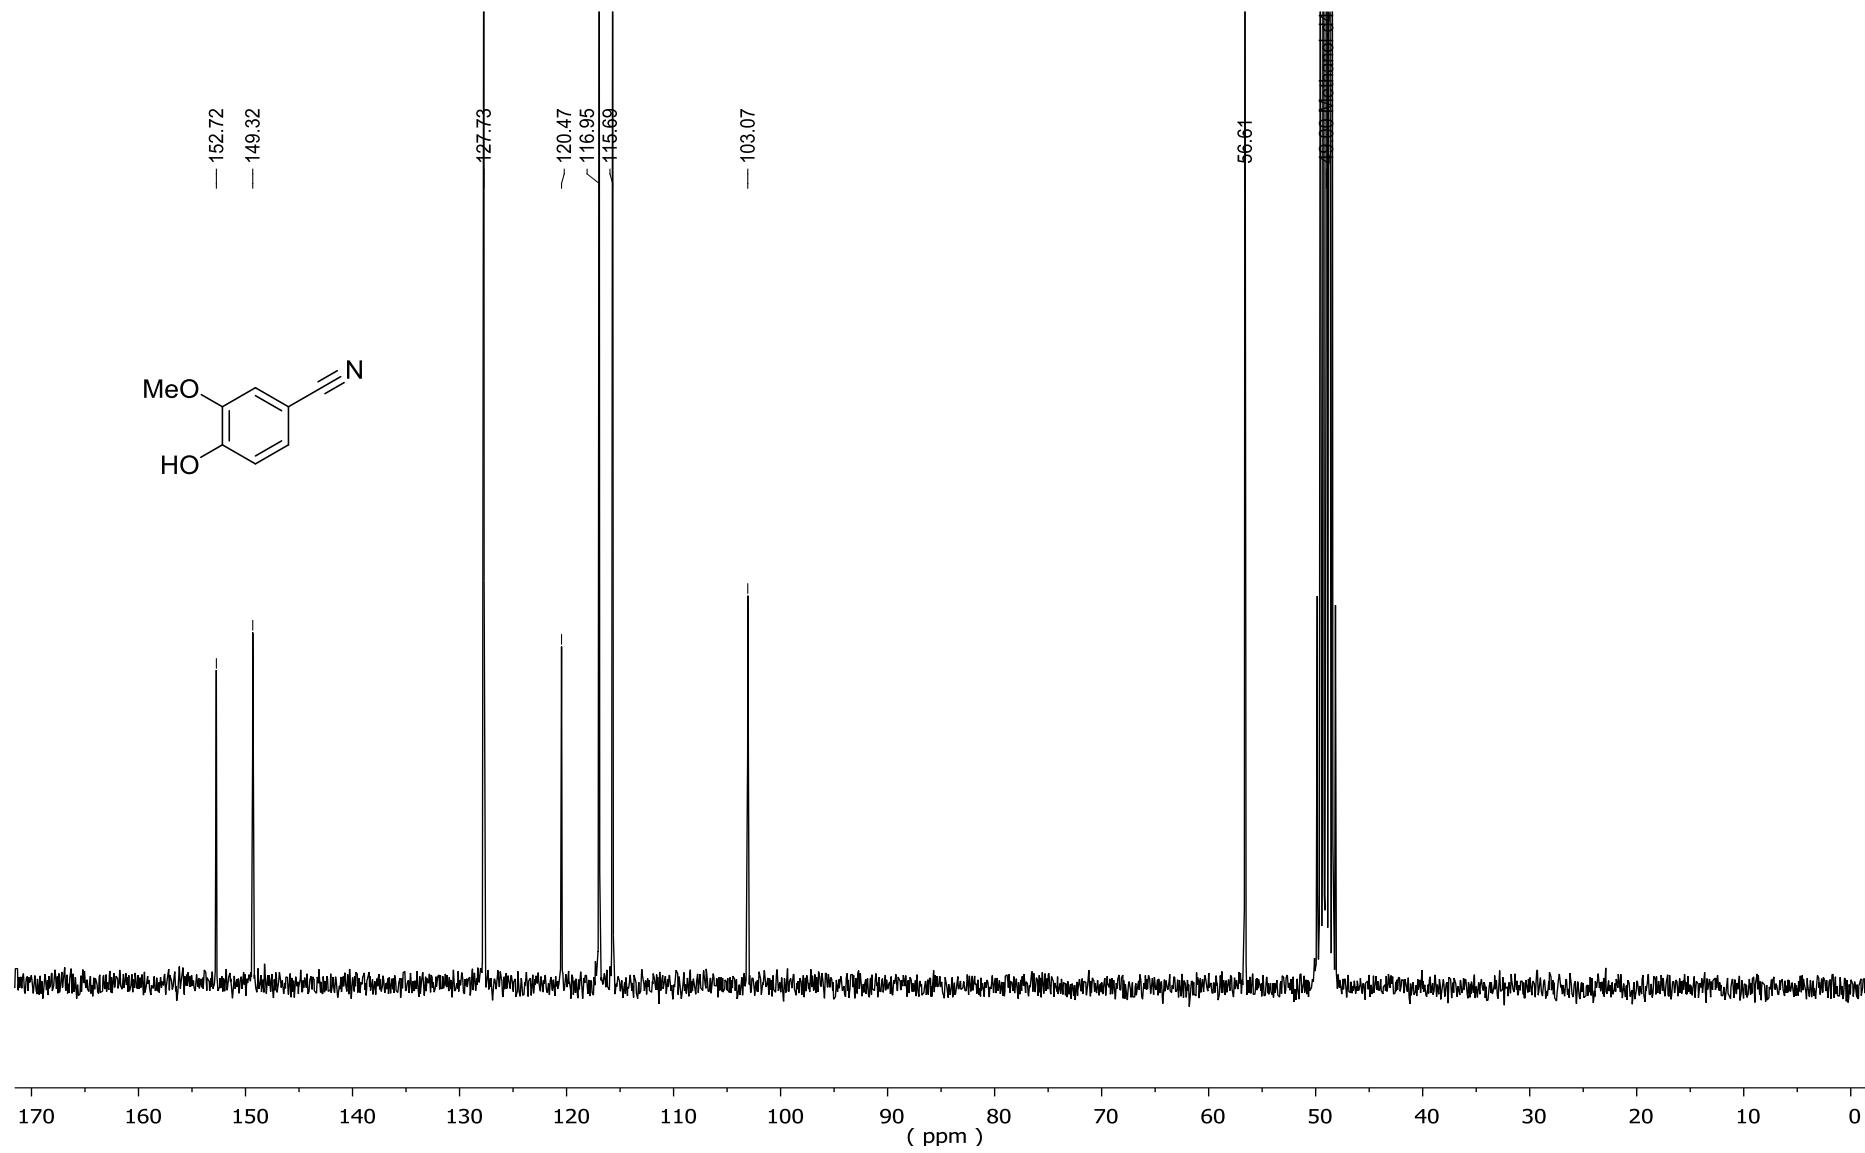

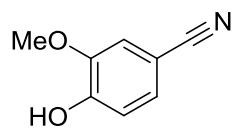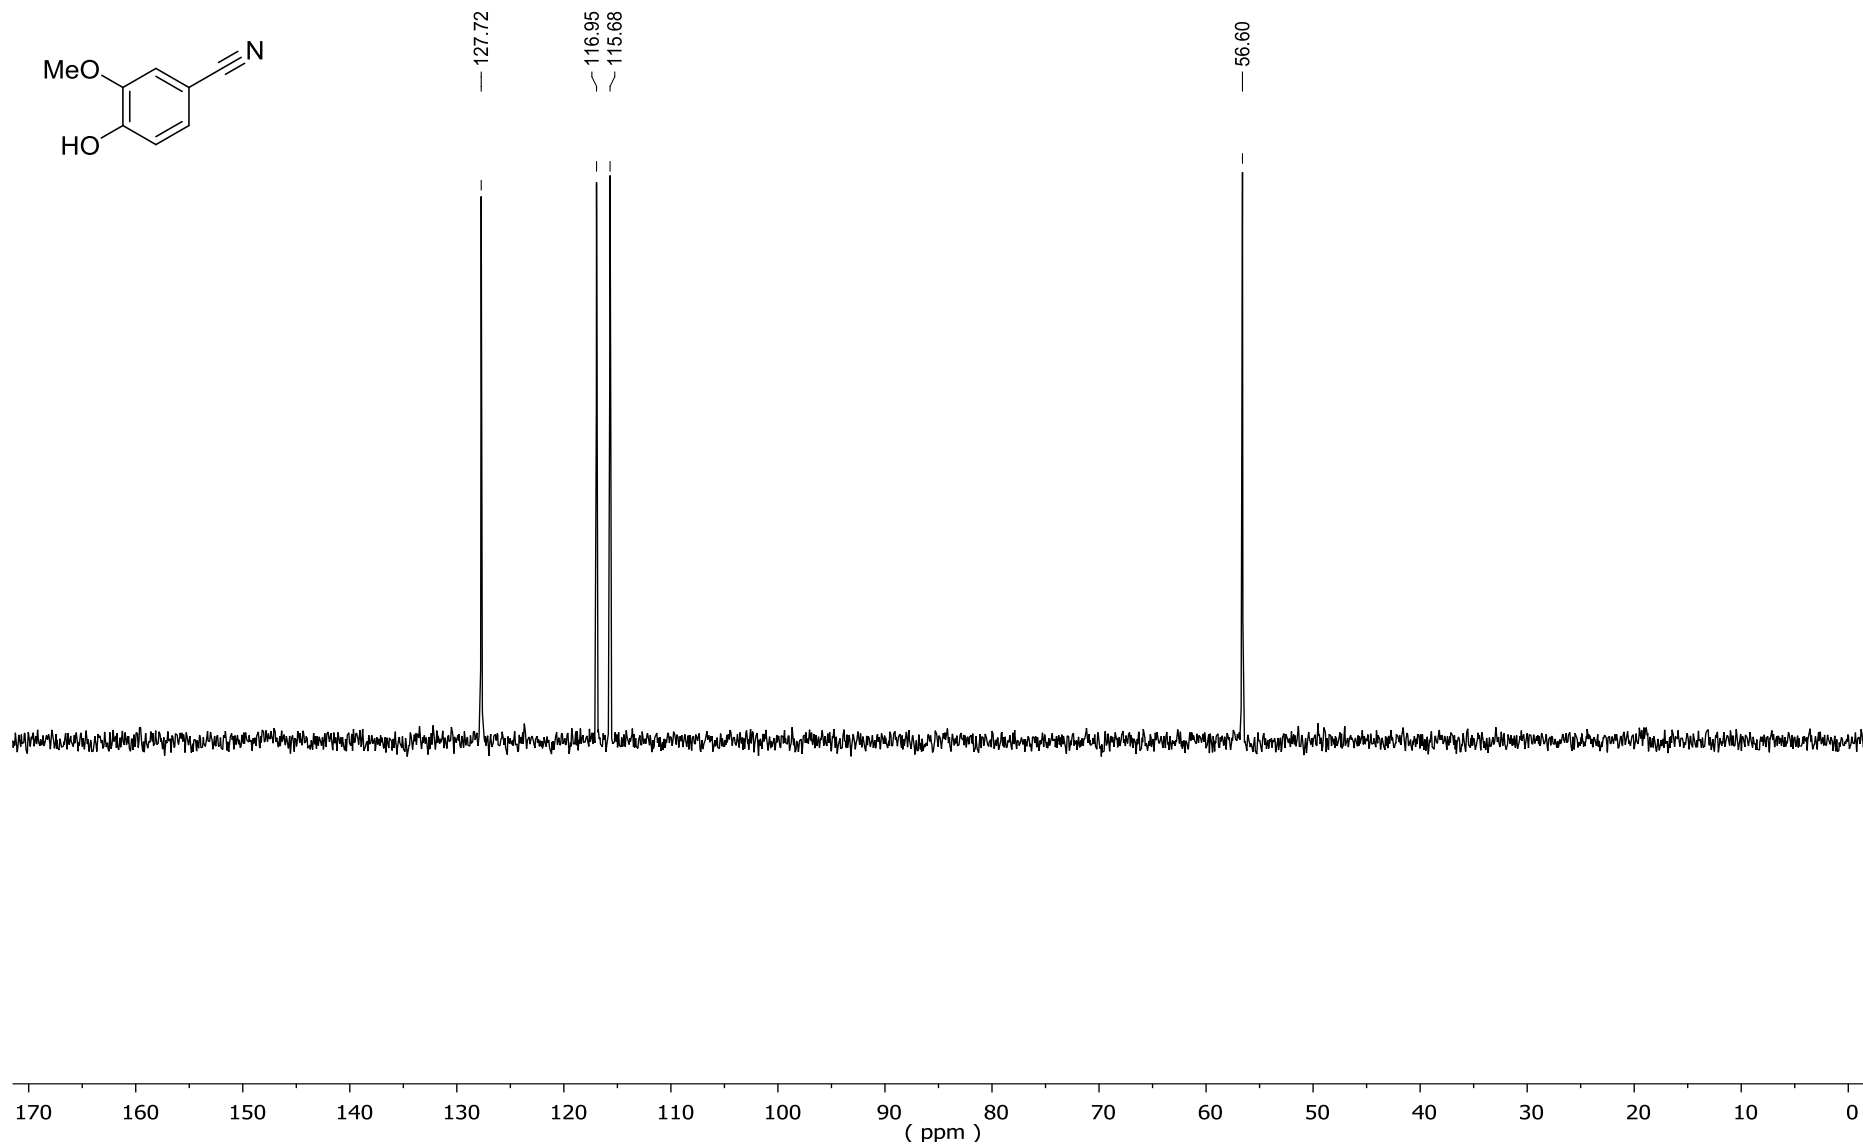

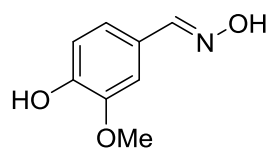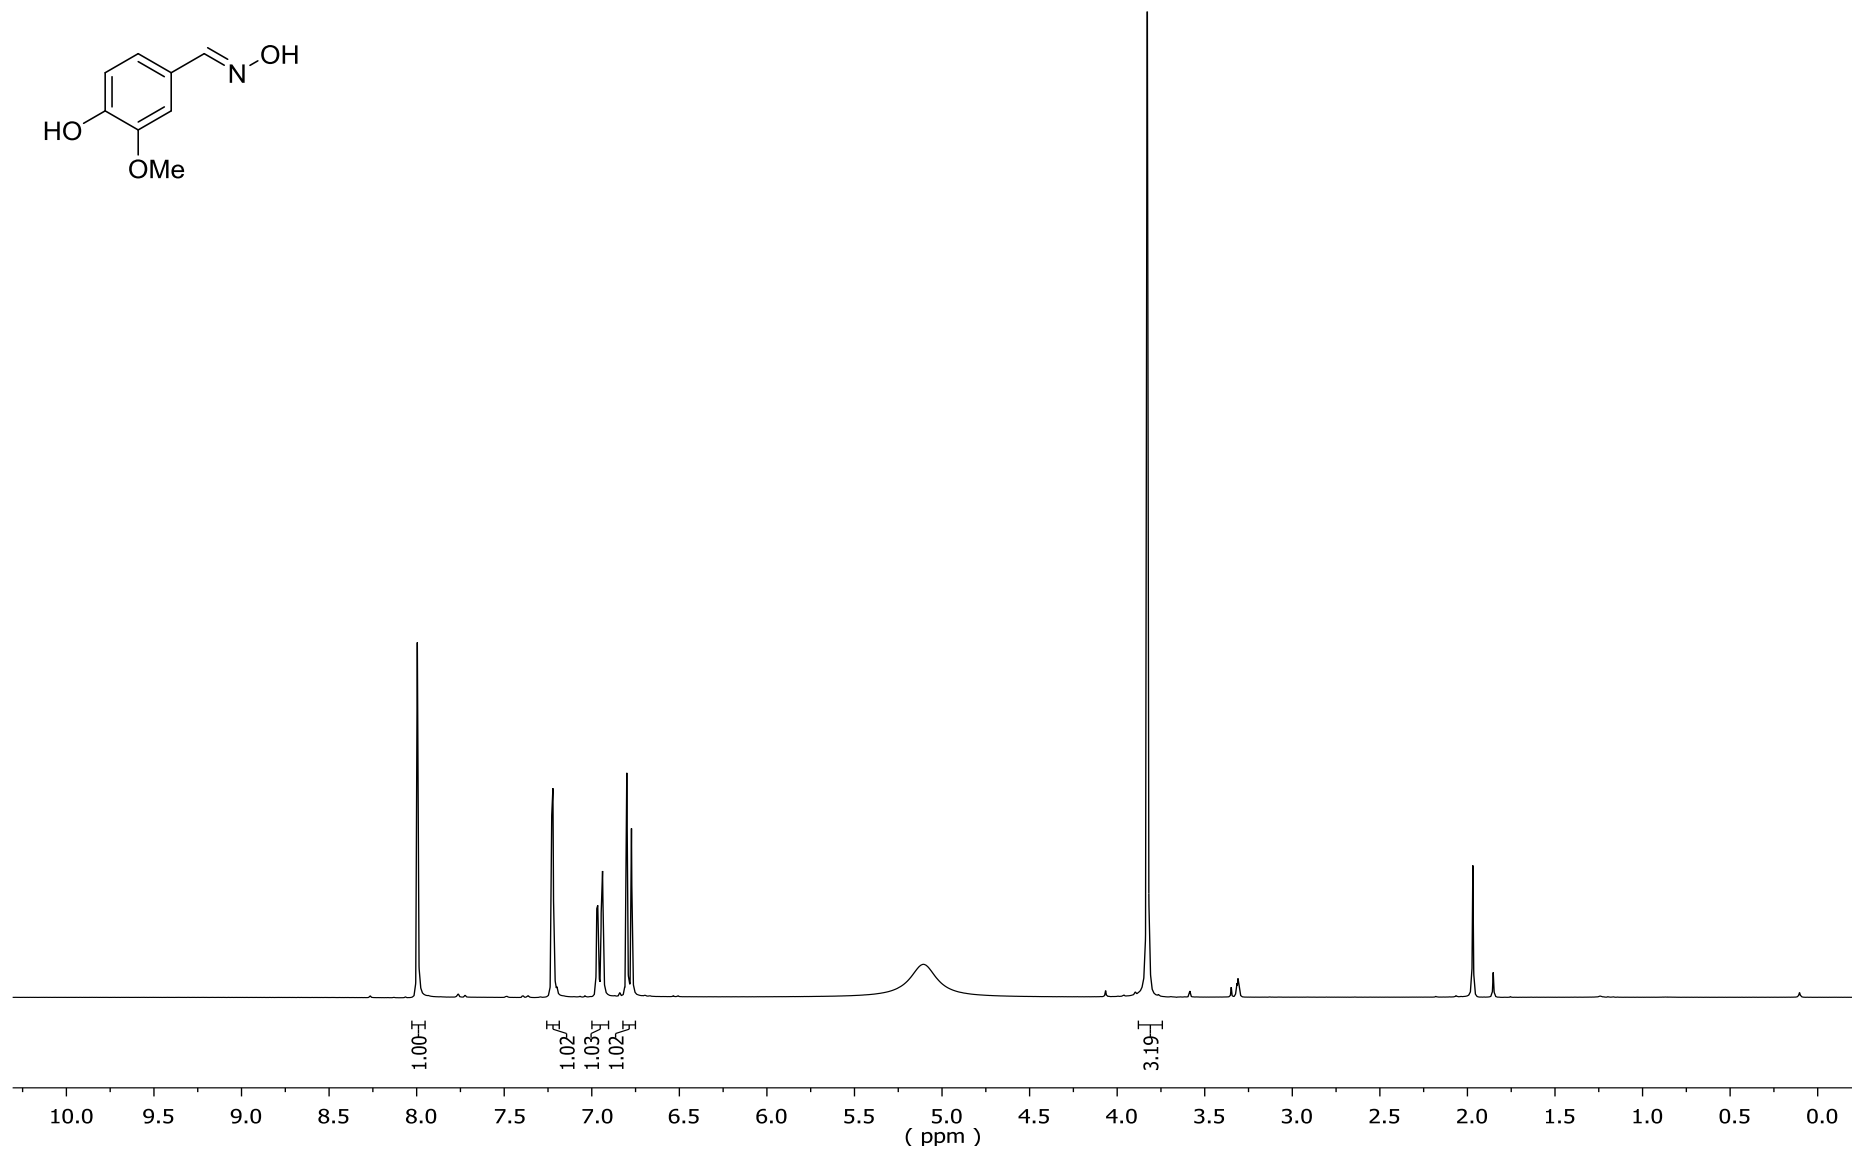

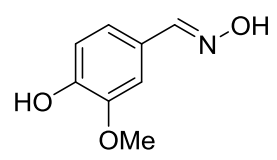

150.62  
149.28  
149.12

125.91  
122.43  
116.05  
109.63

56.19  
49.00 Methanol-d4

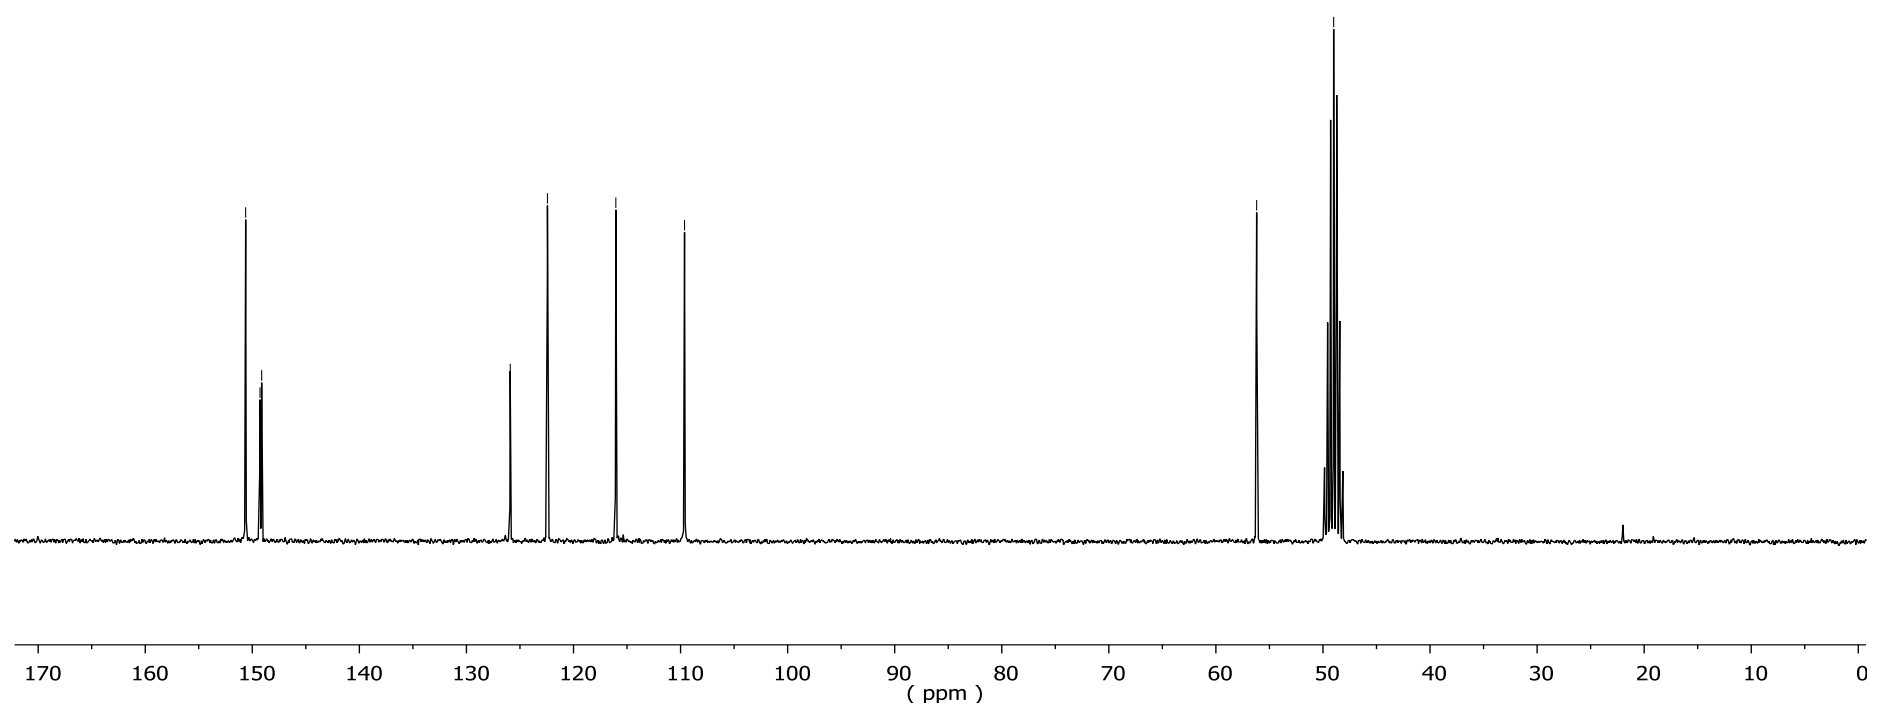



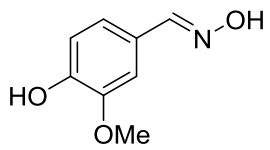

— 150.63

— 122.44

— 116.05

— 109.63

— 56.19  
— 56.19

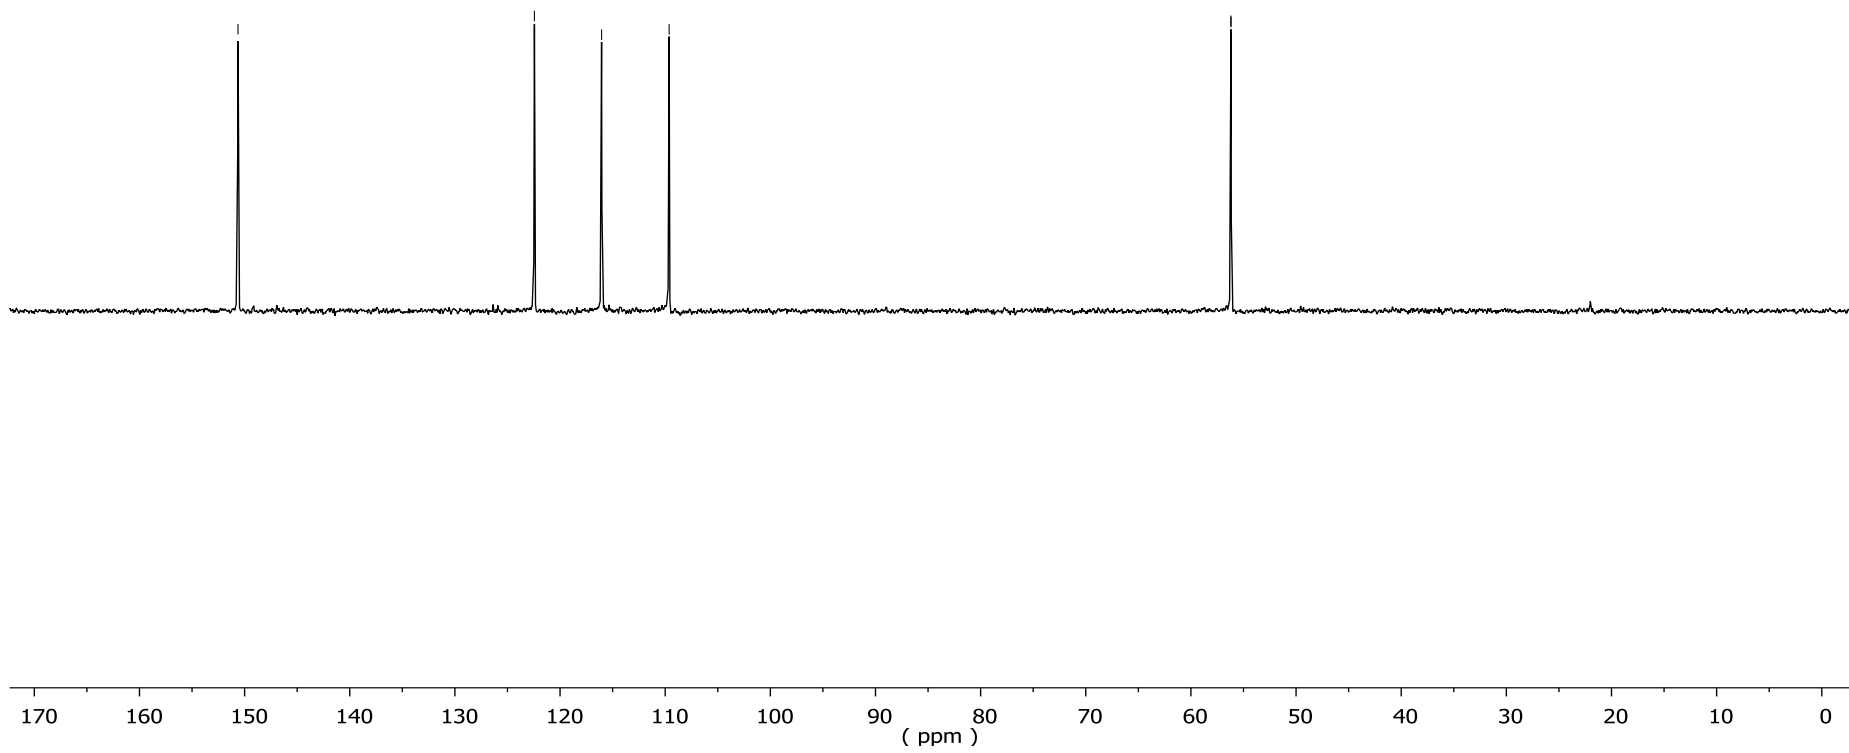

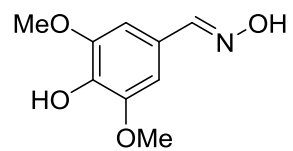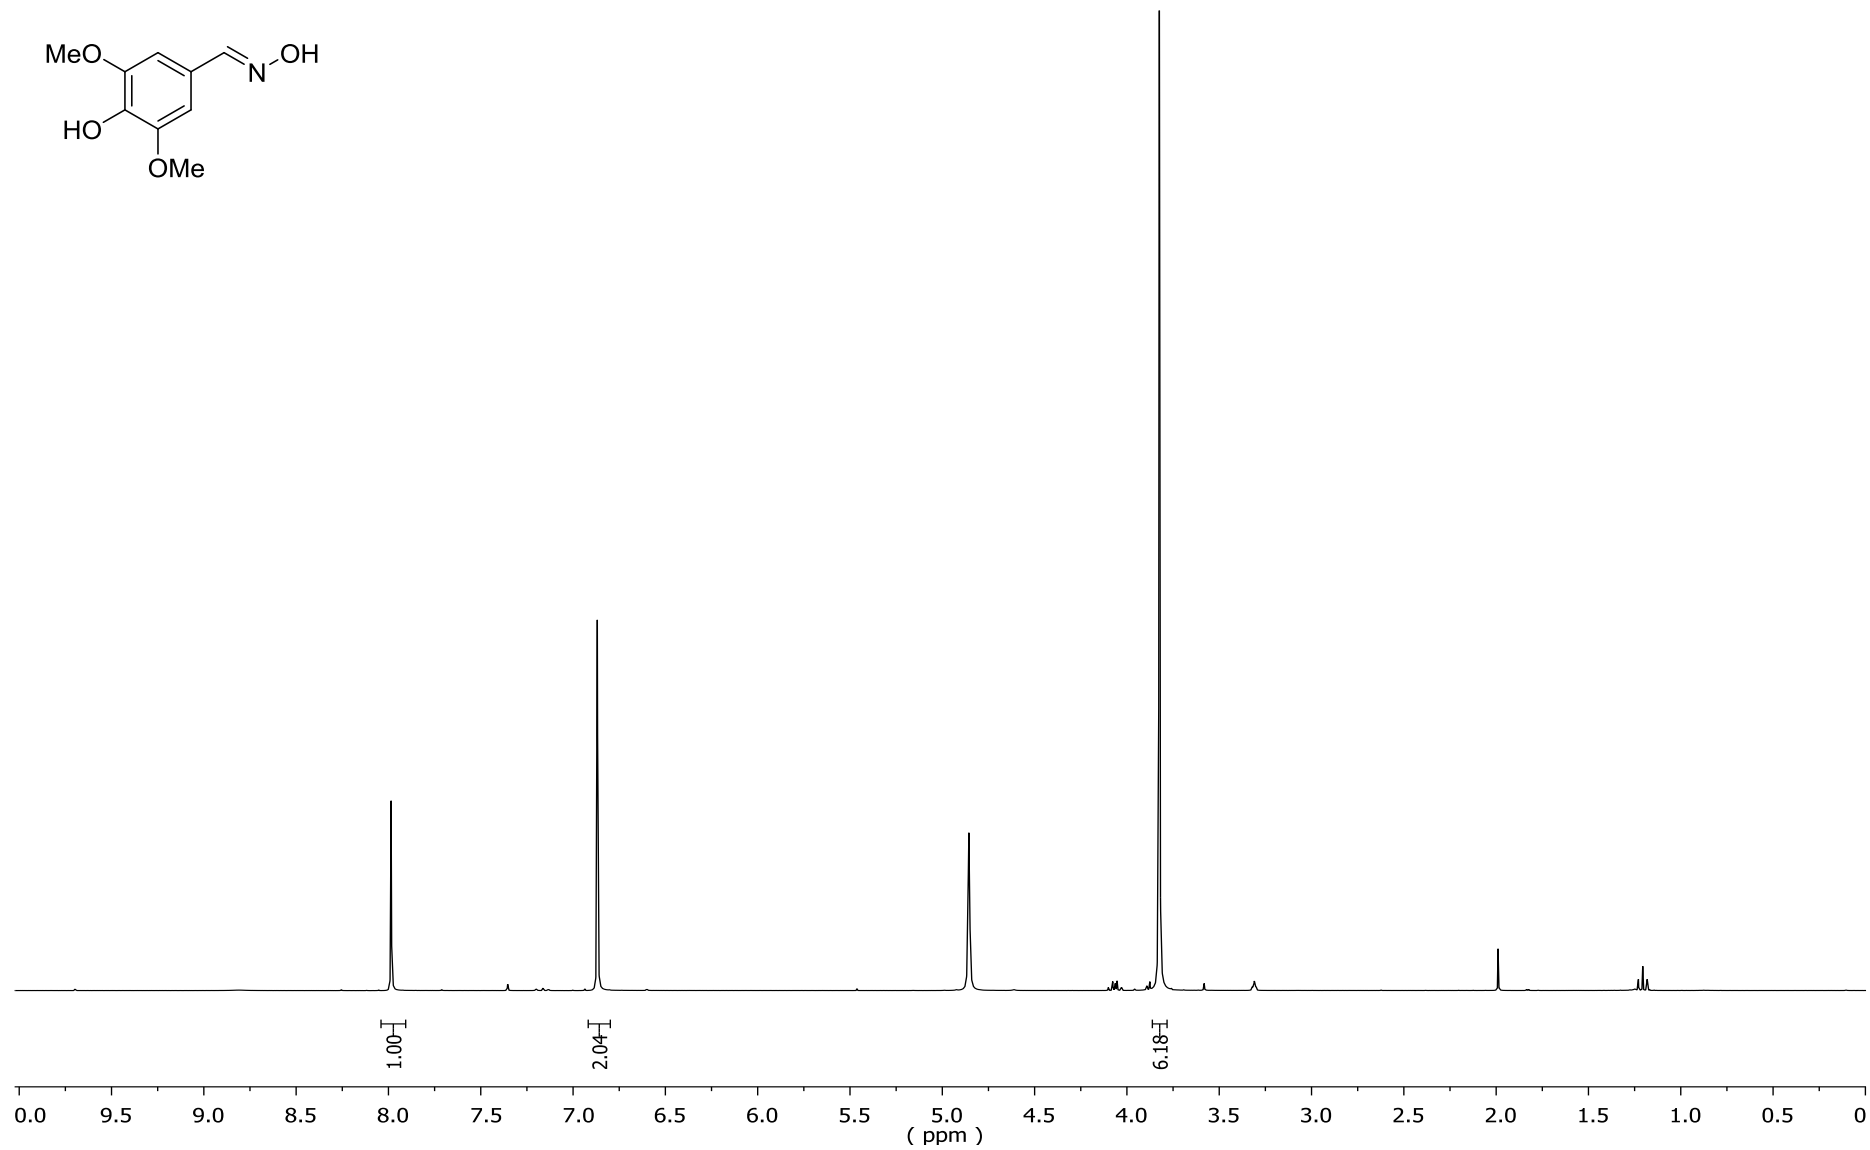

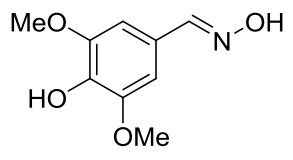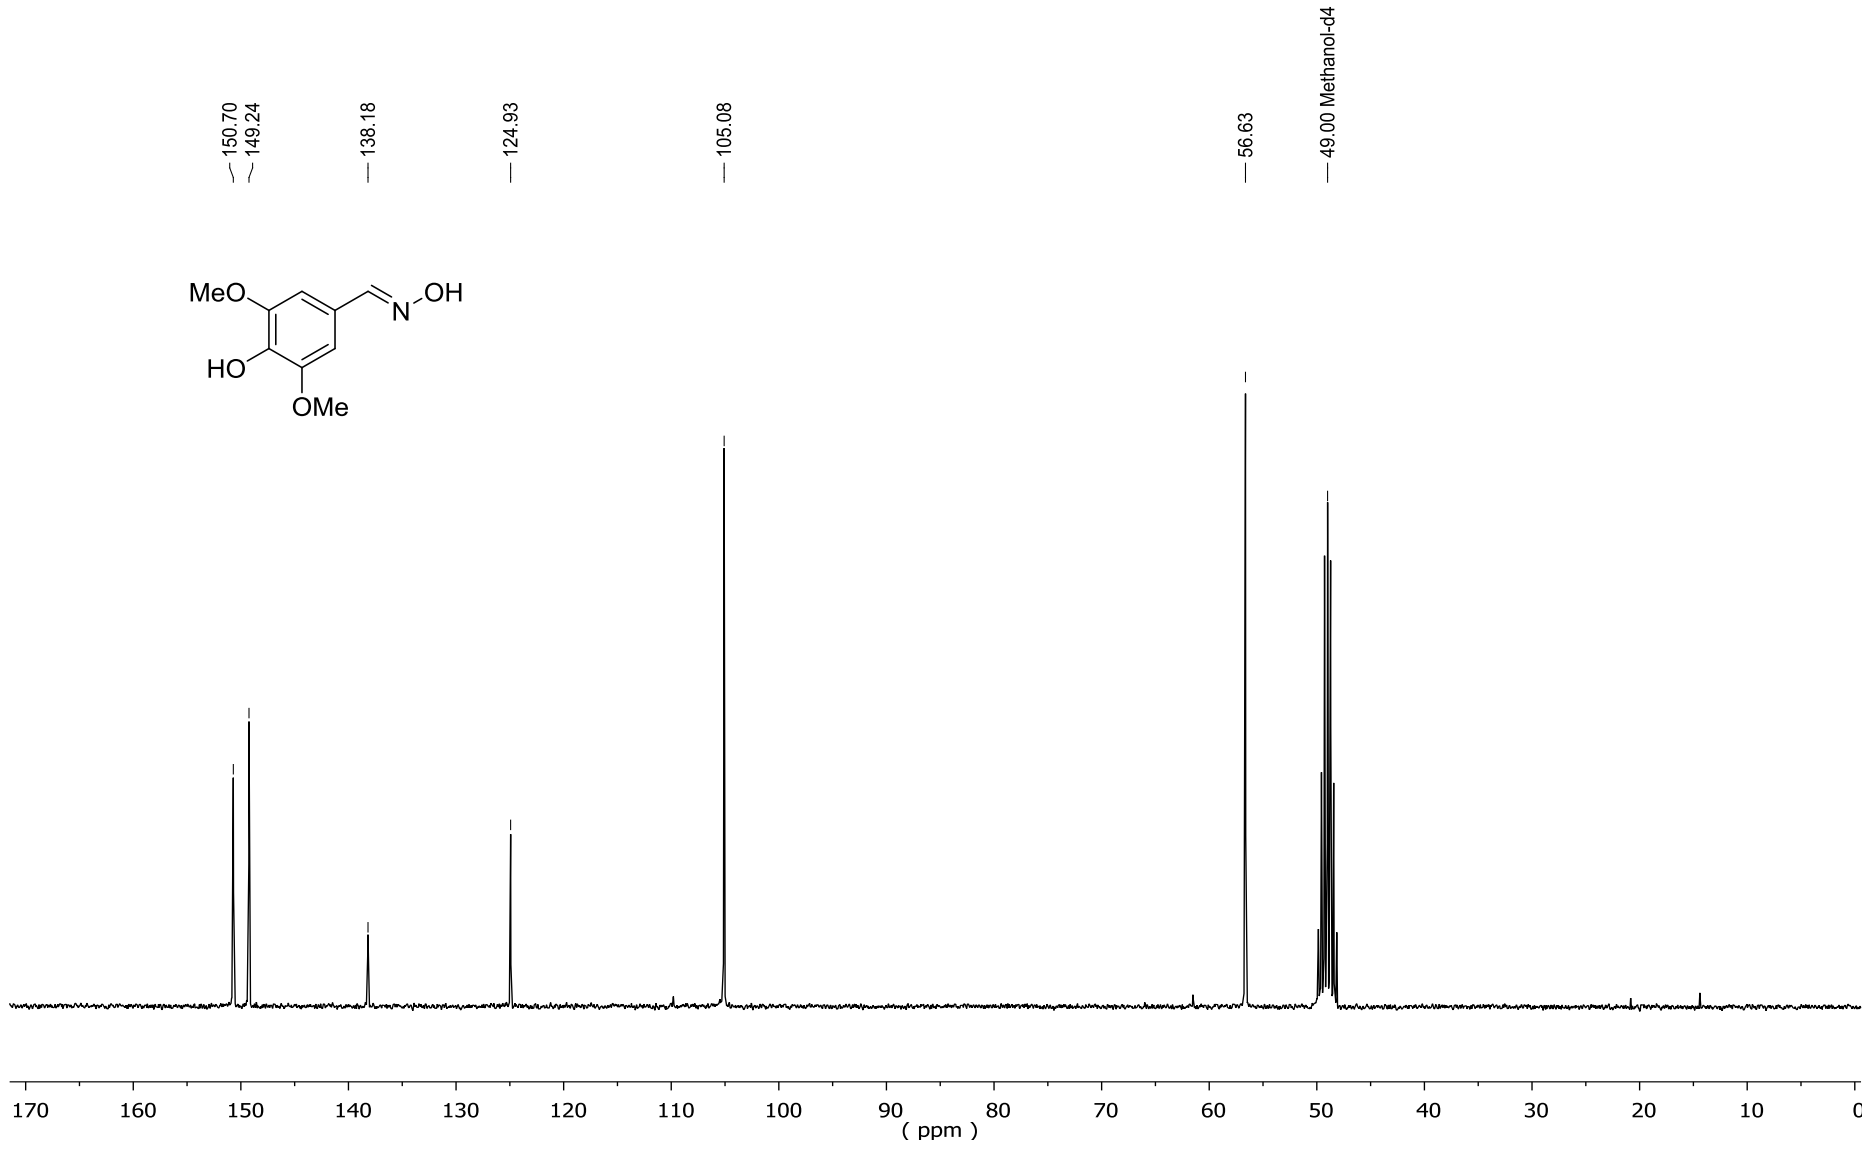

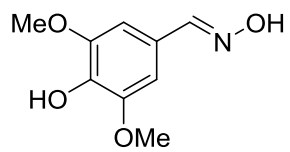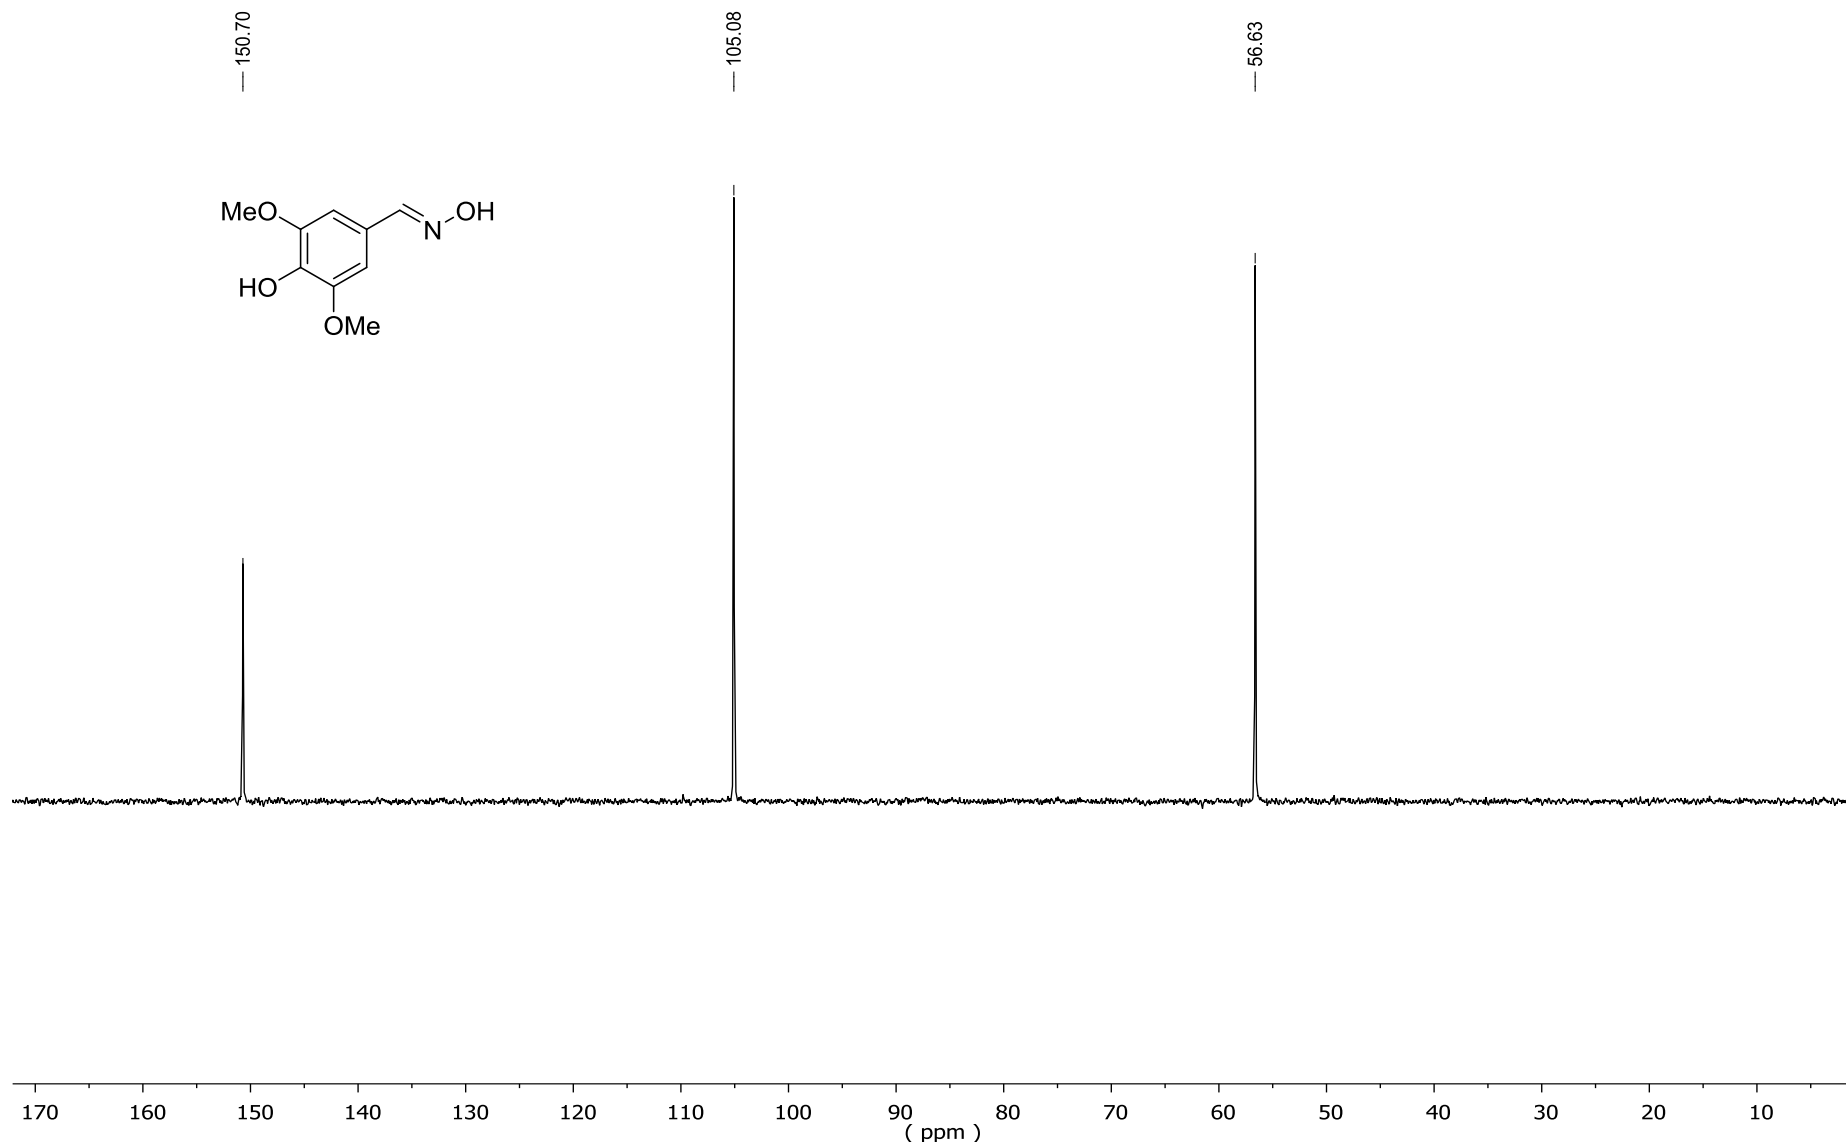

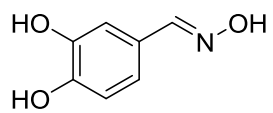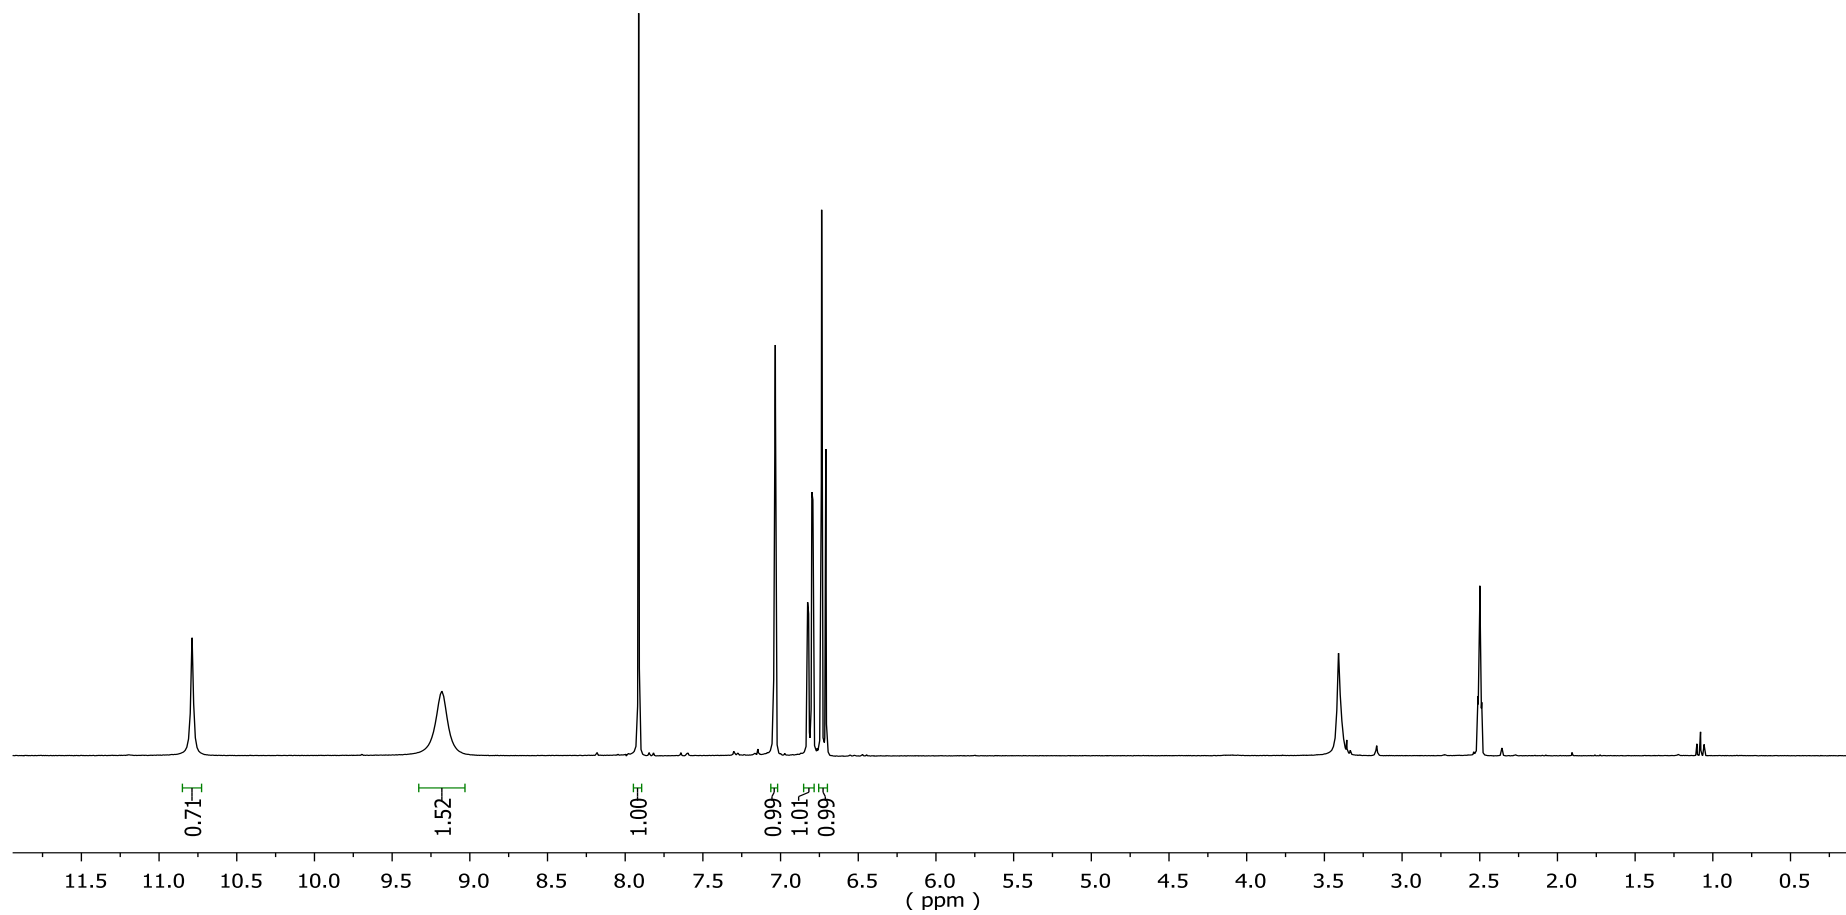

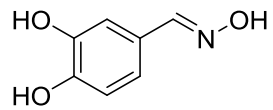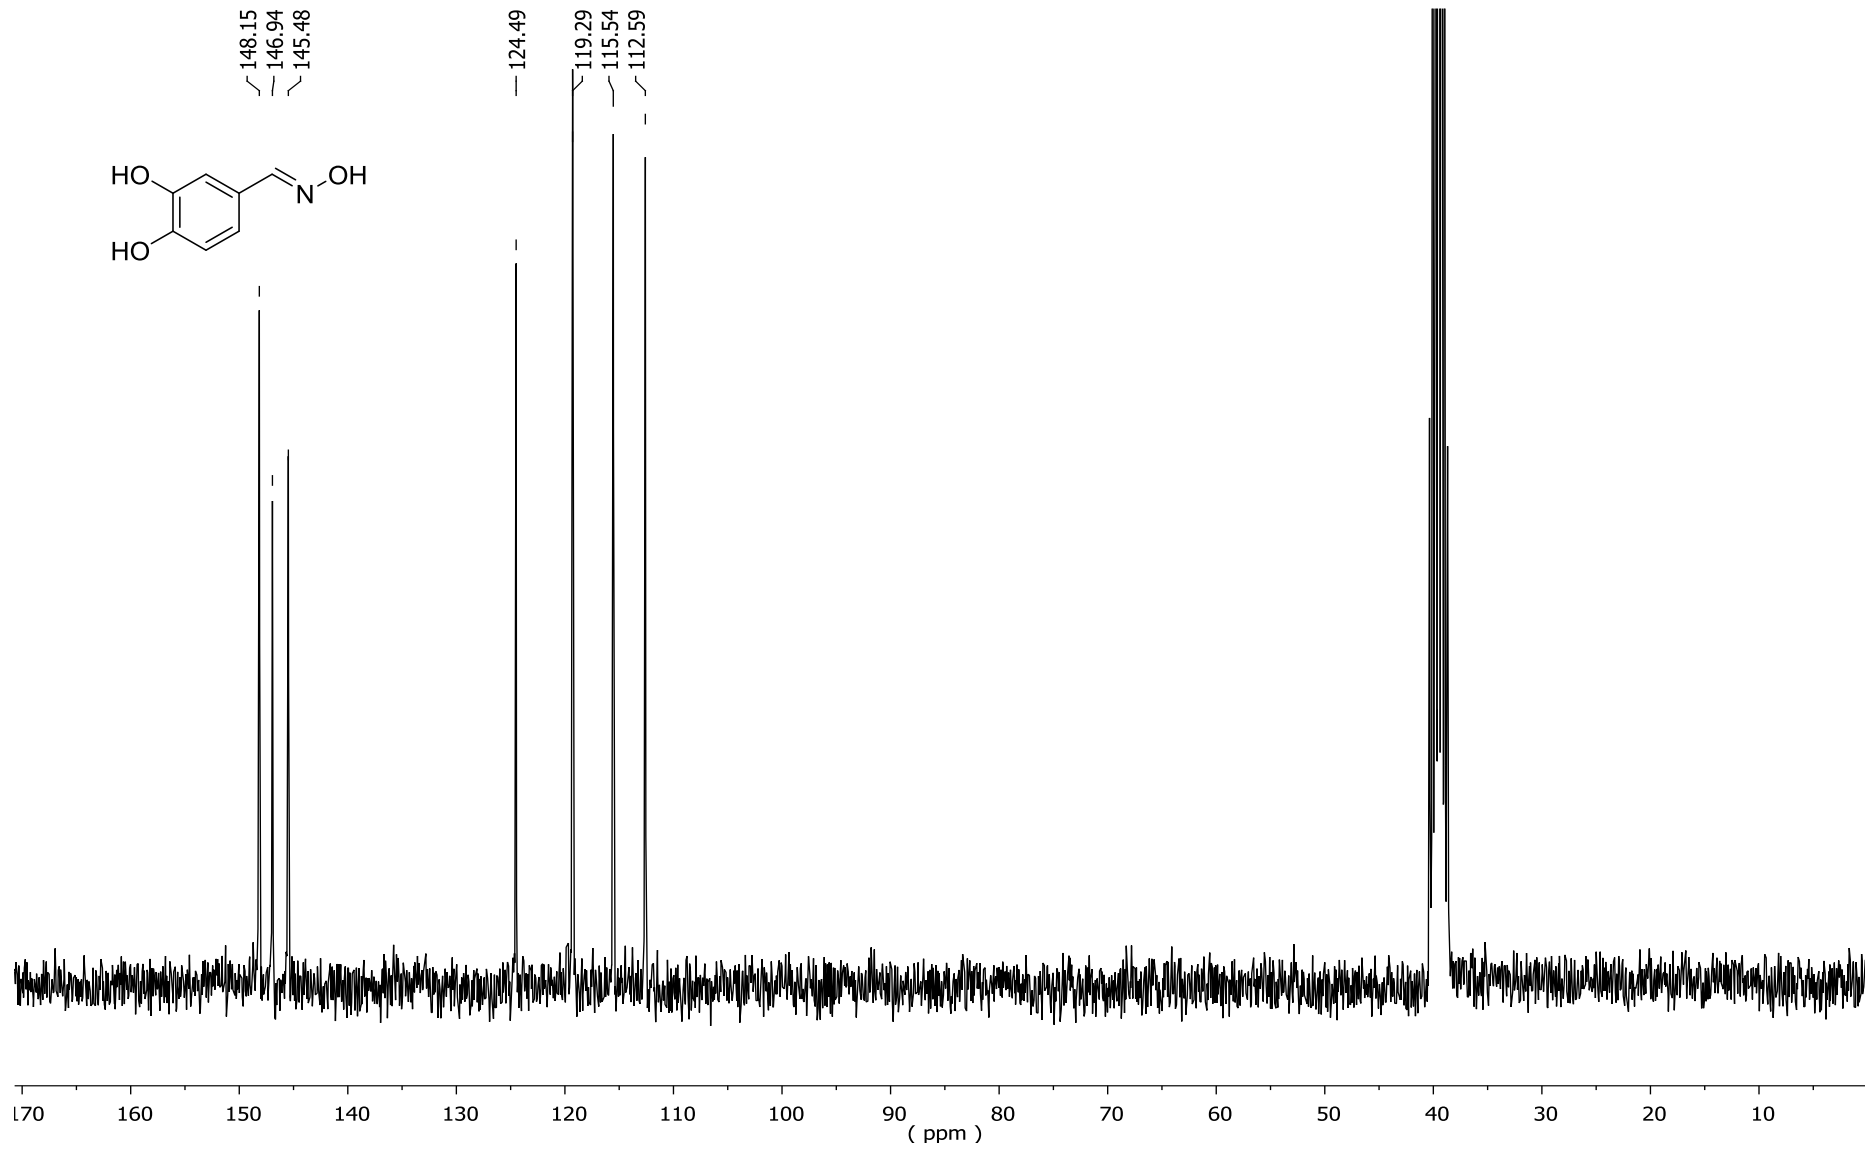

S30

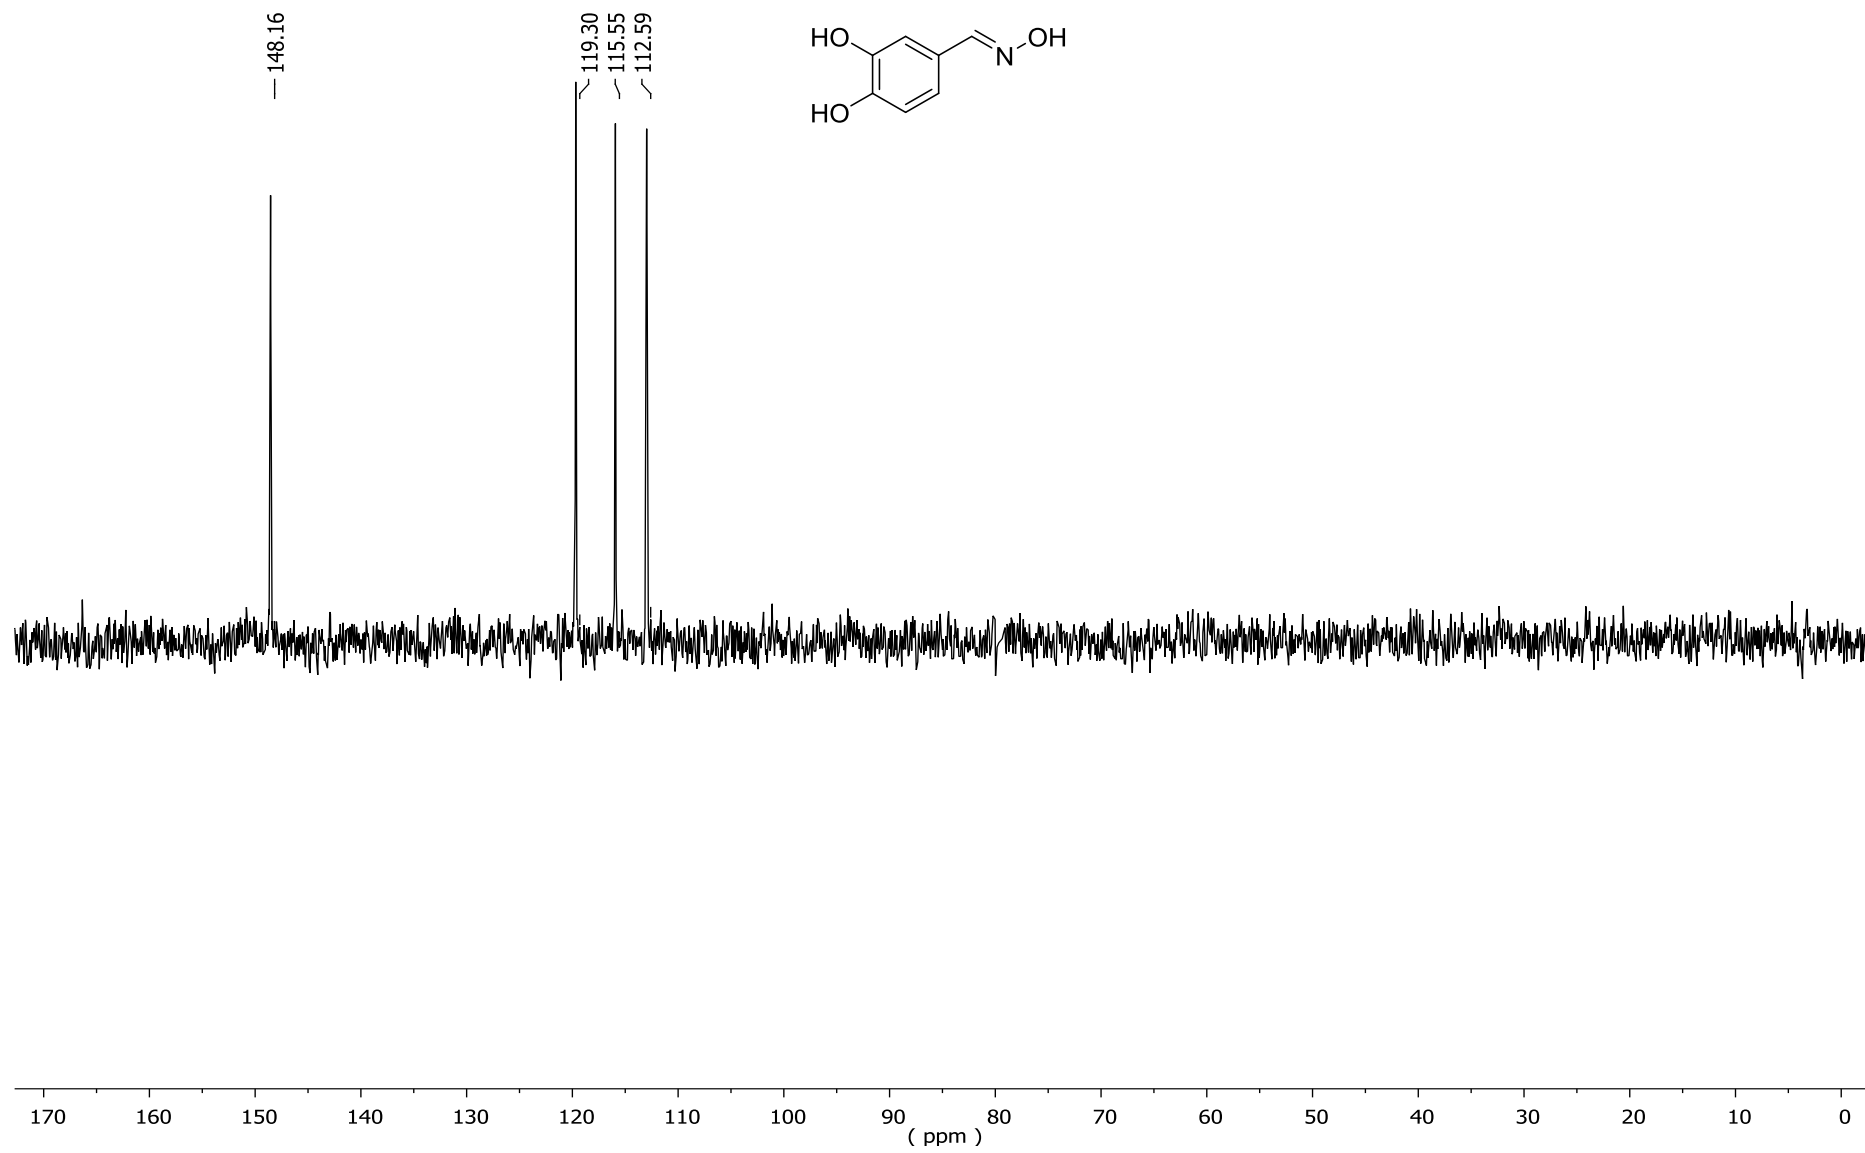

S31

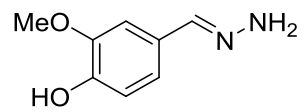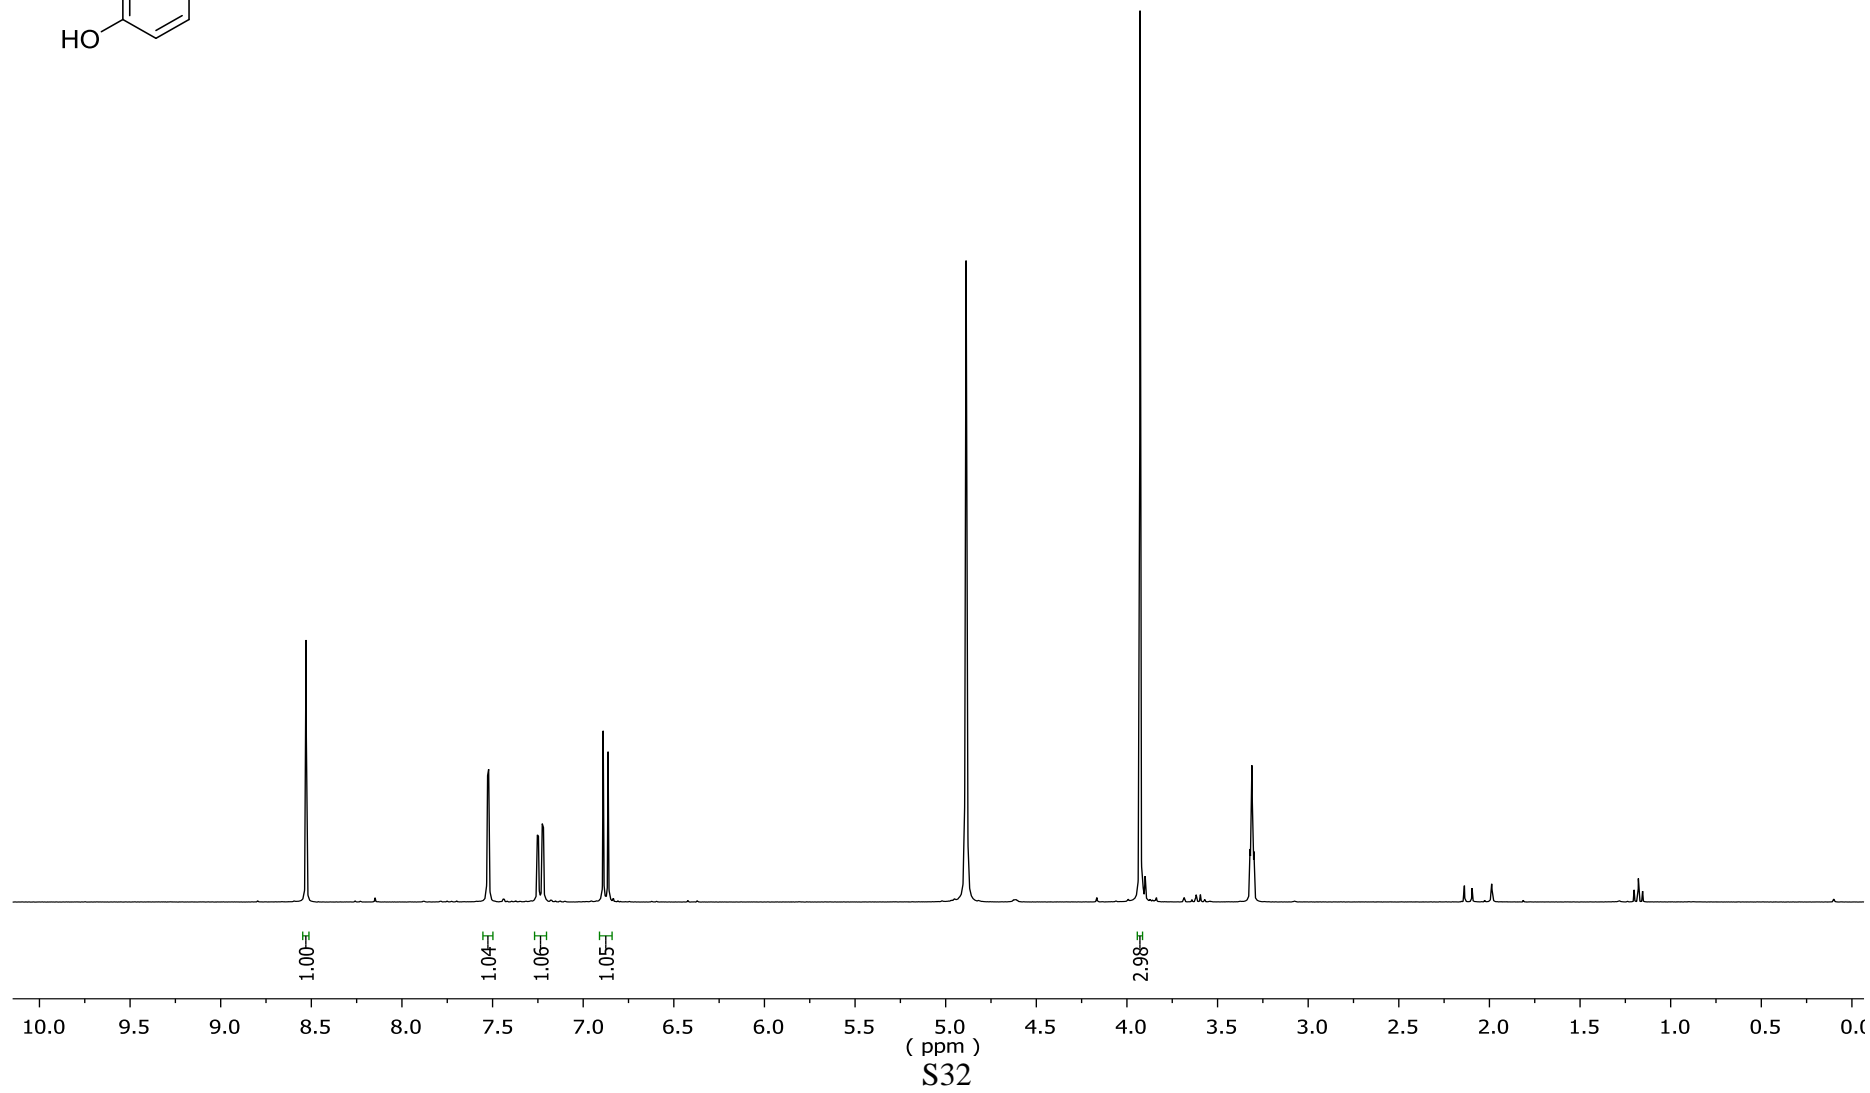



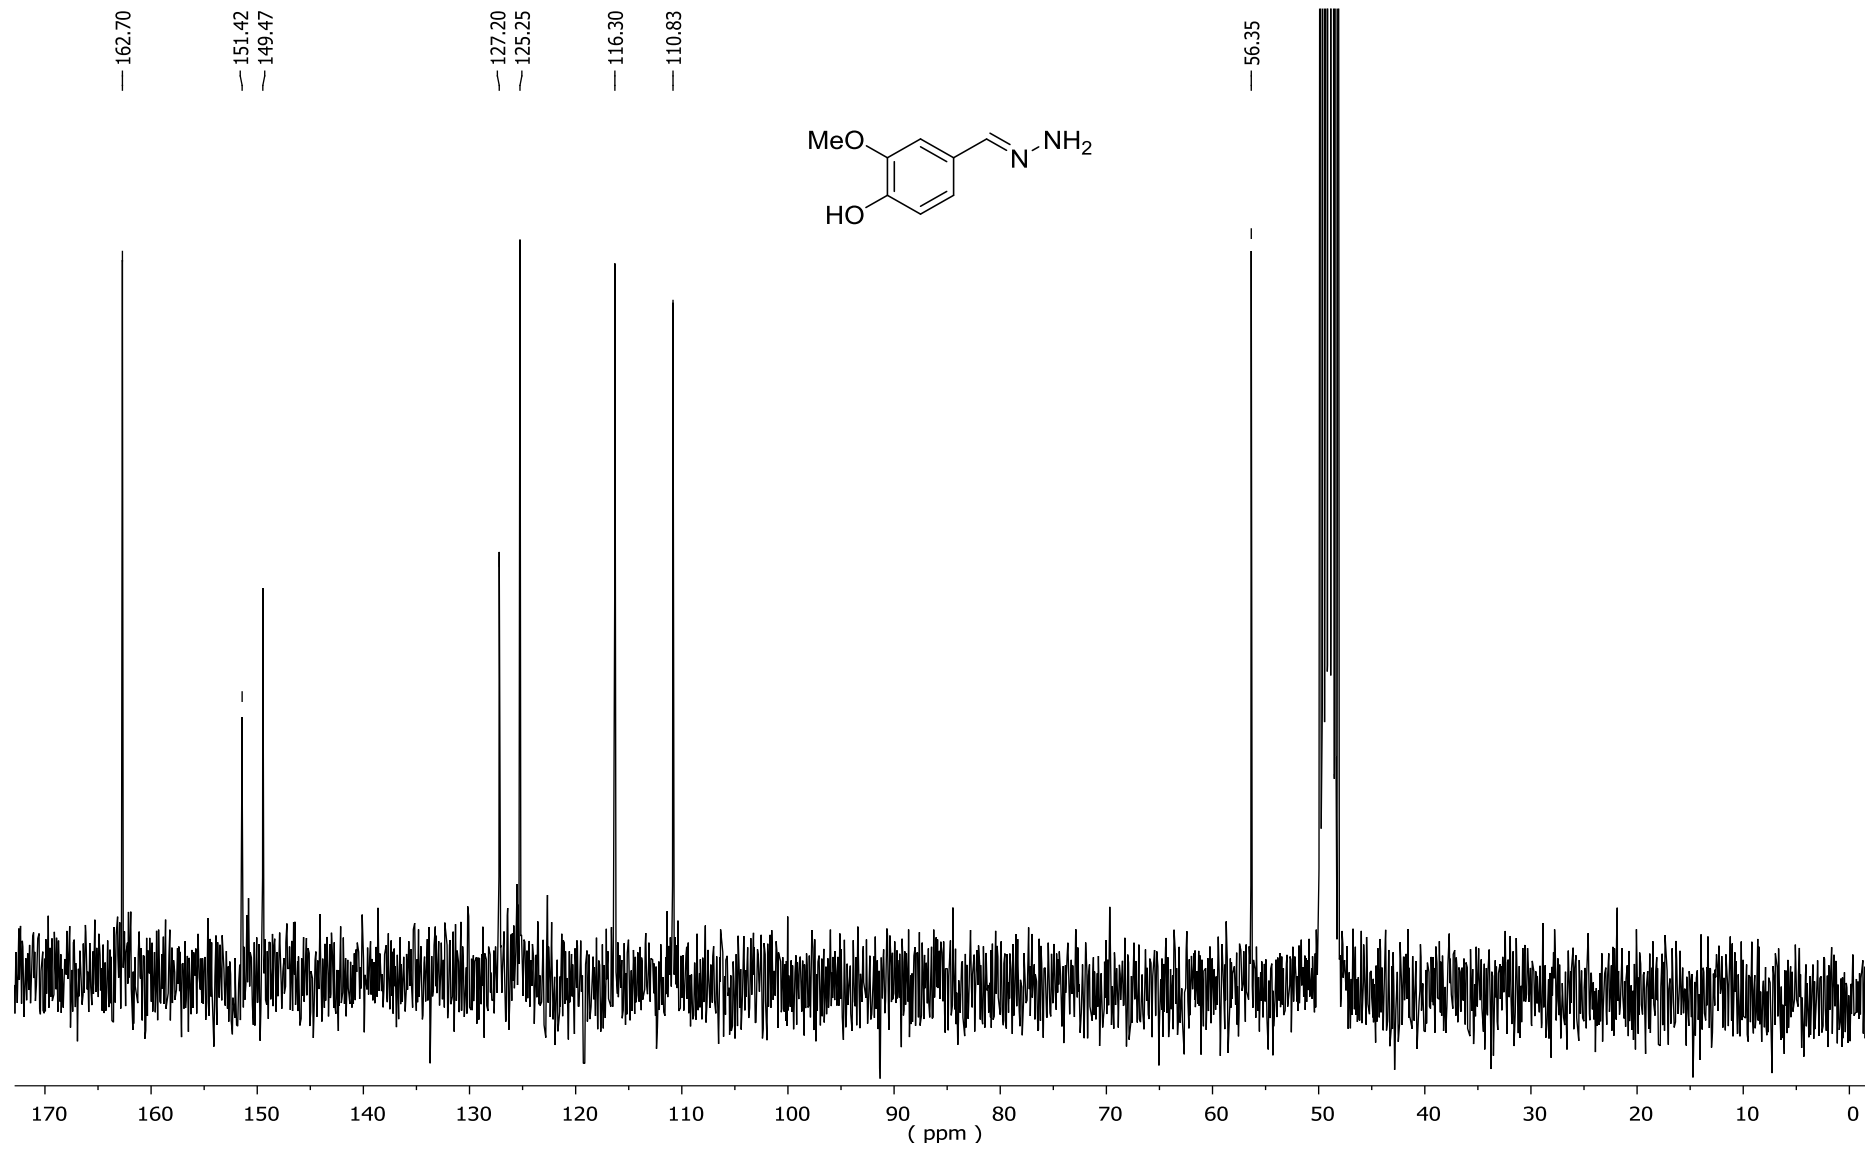

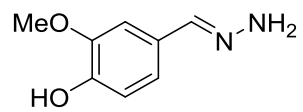

— 162.73

— 125.26

— 116.32

— 110.83

— 56.35

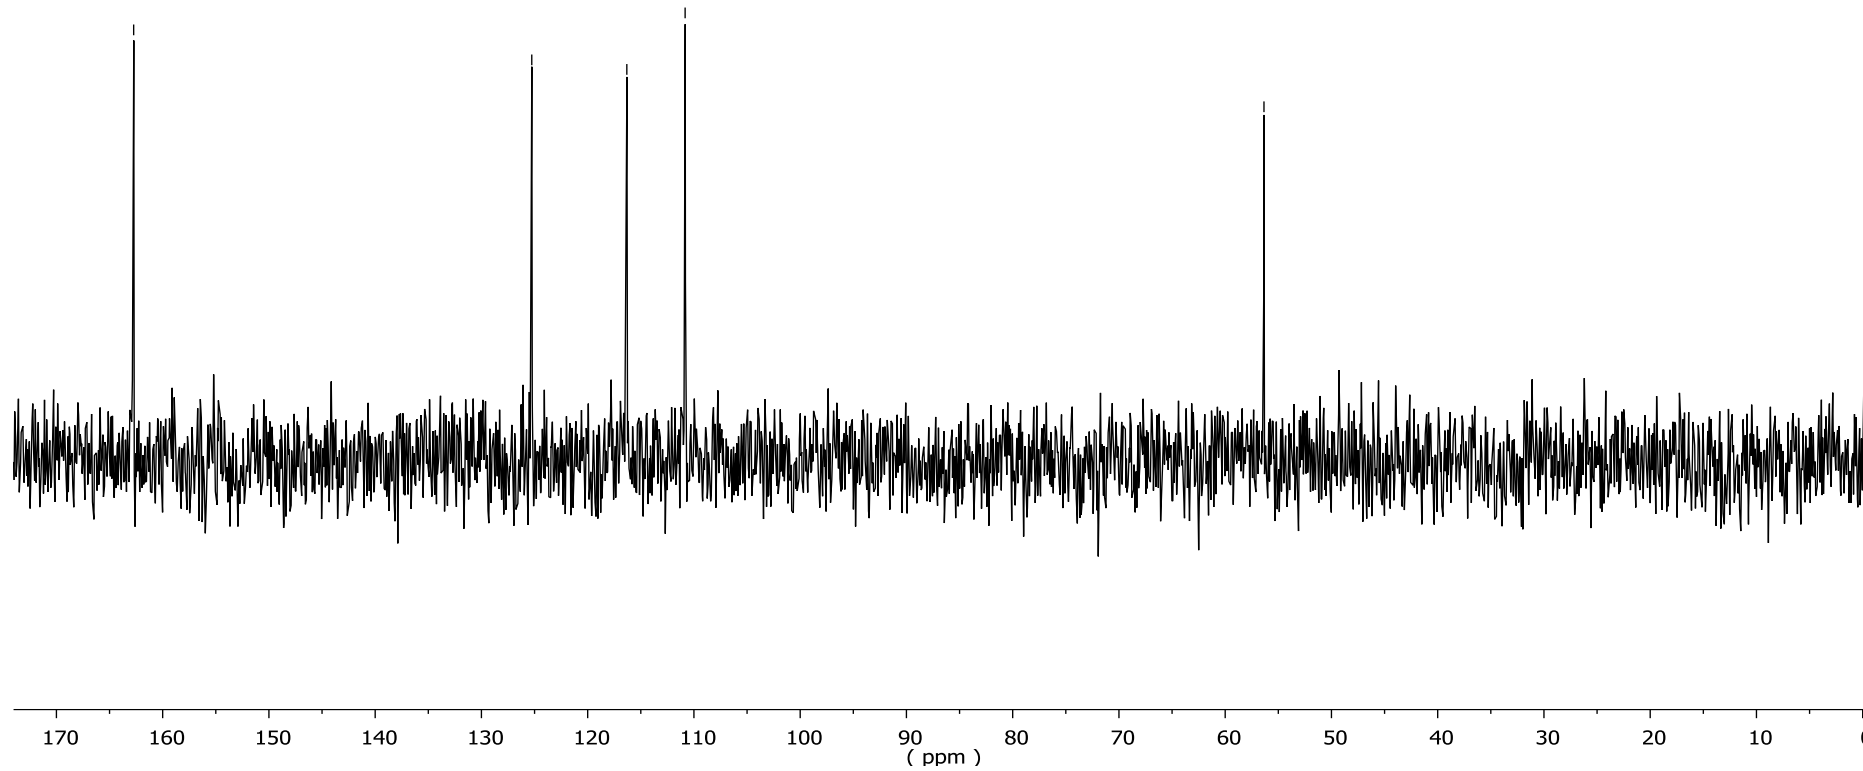

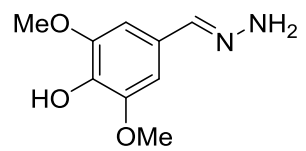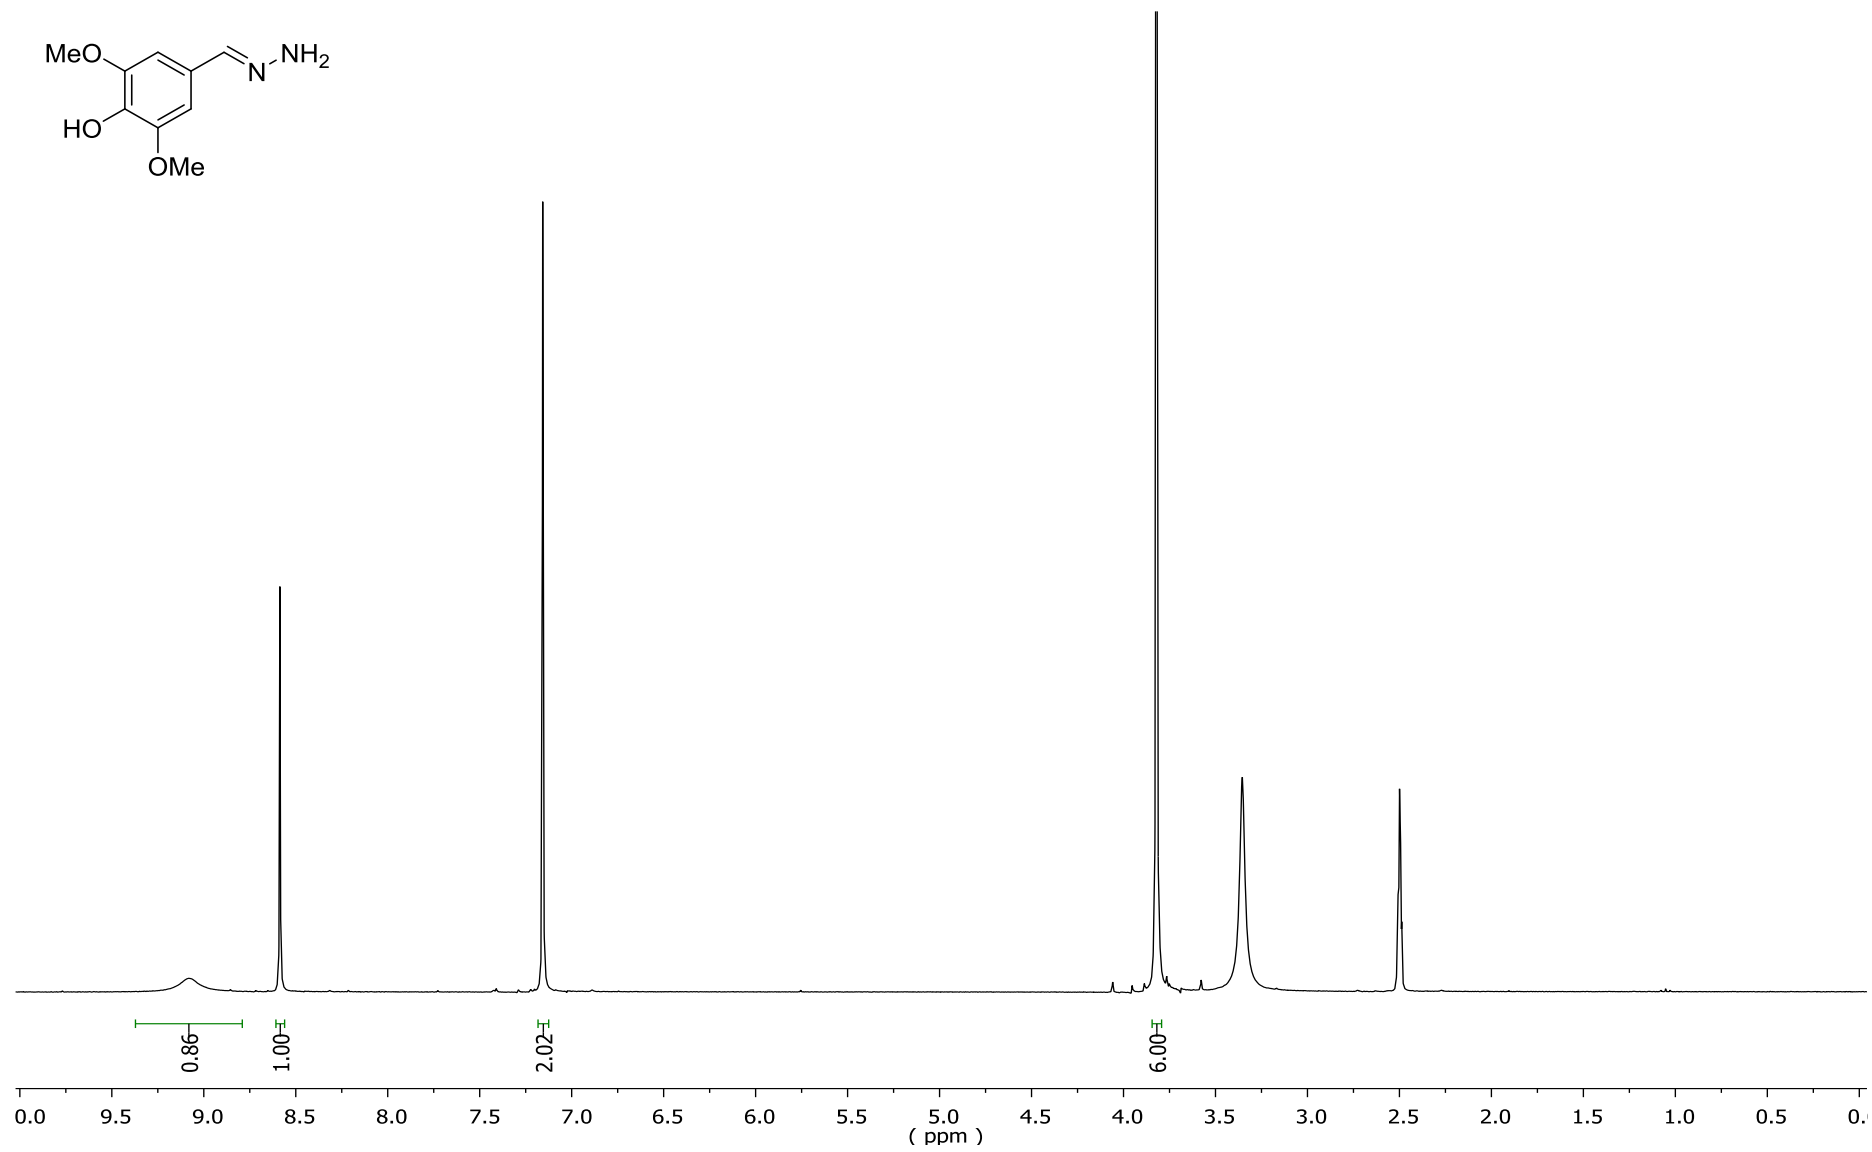

S35

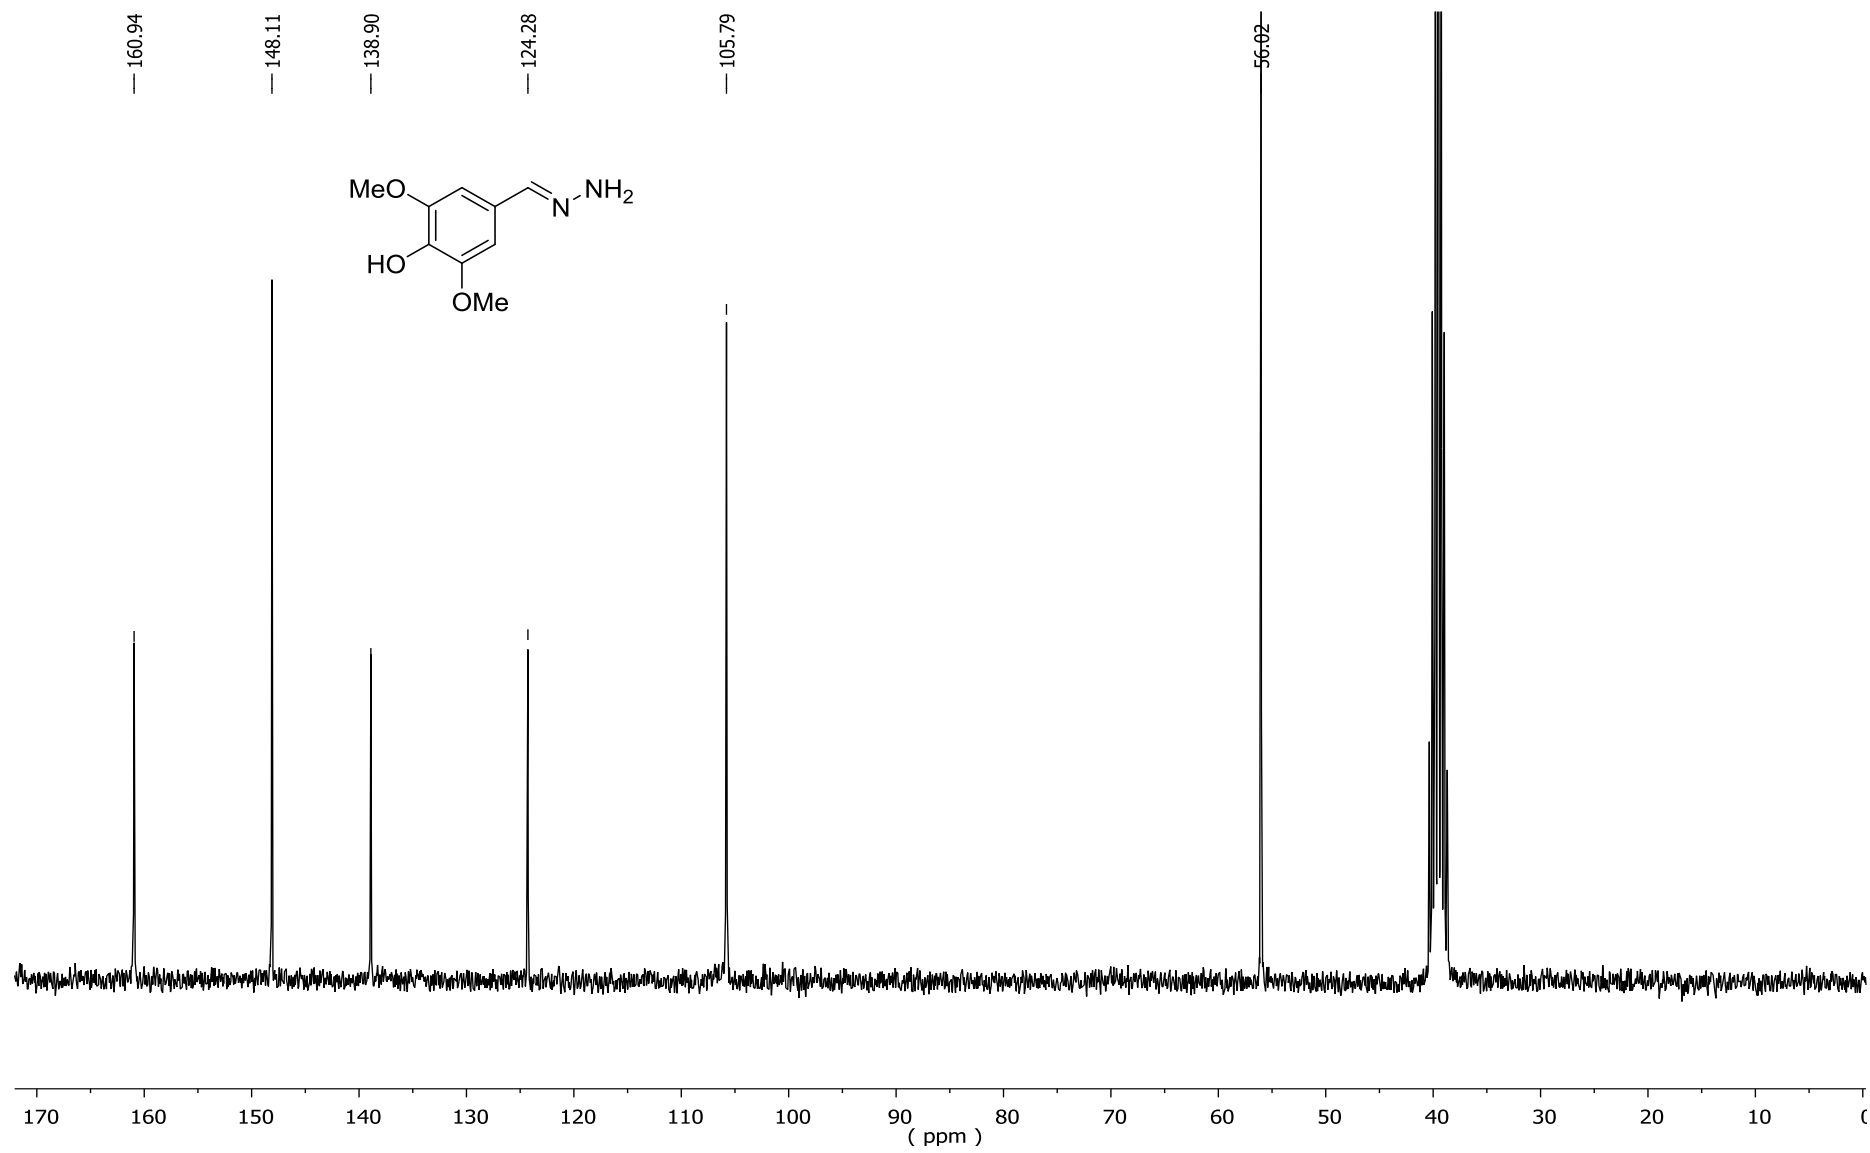

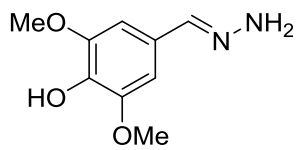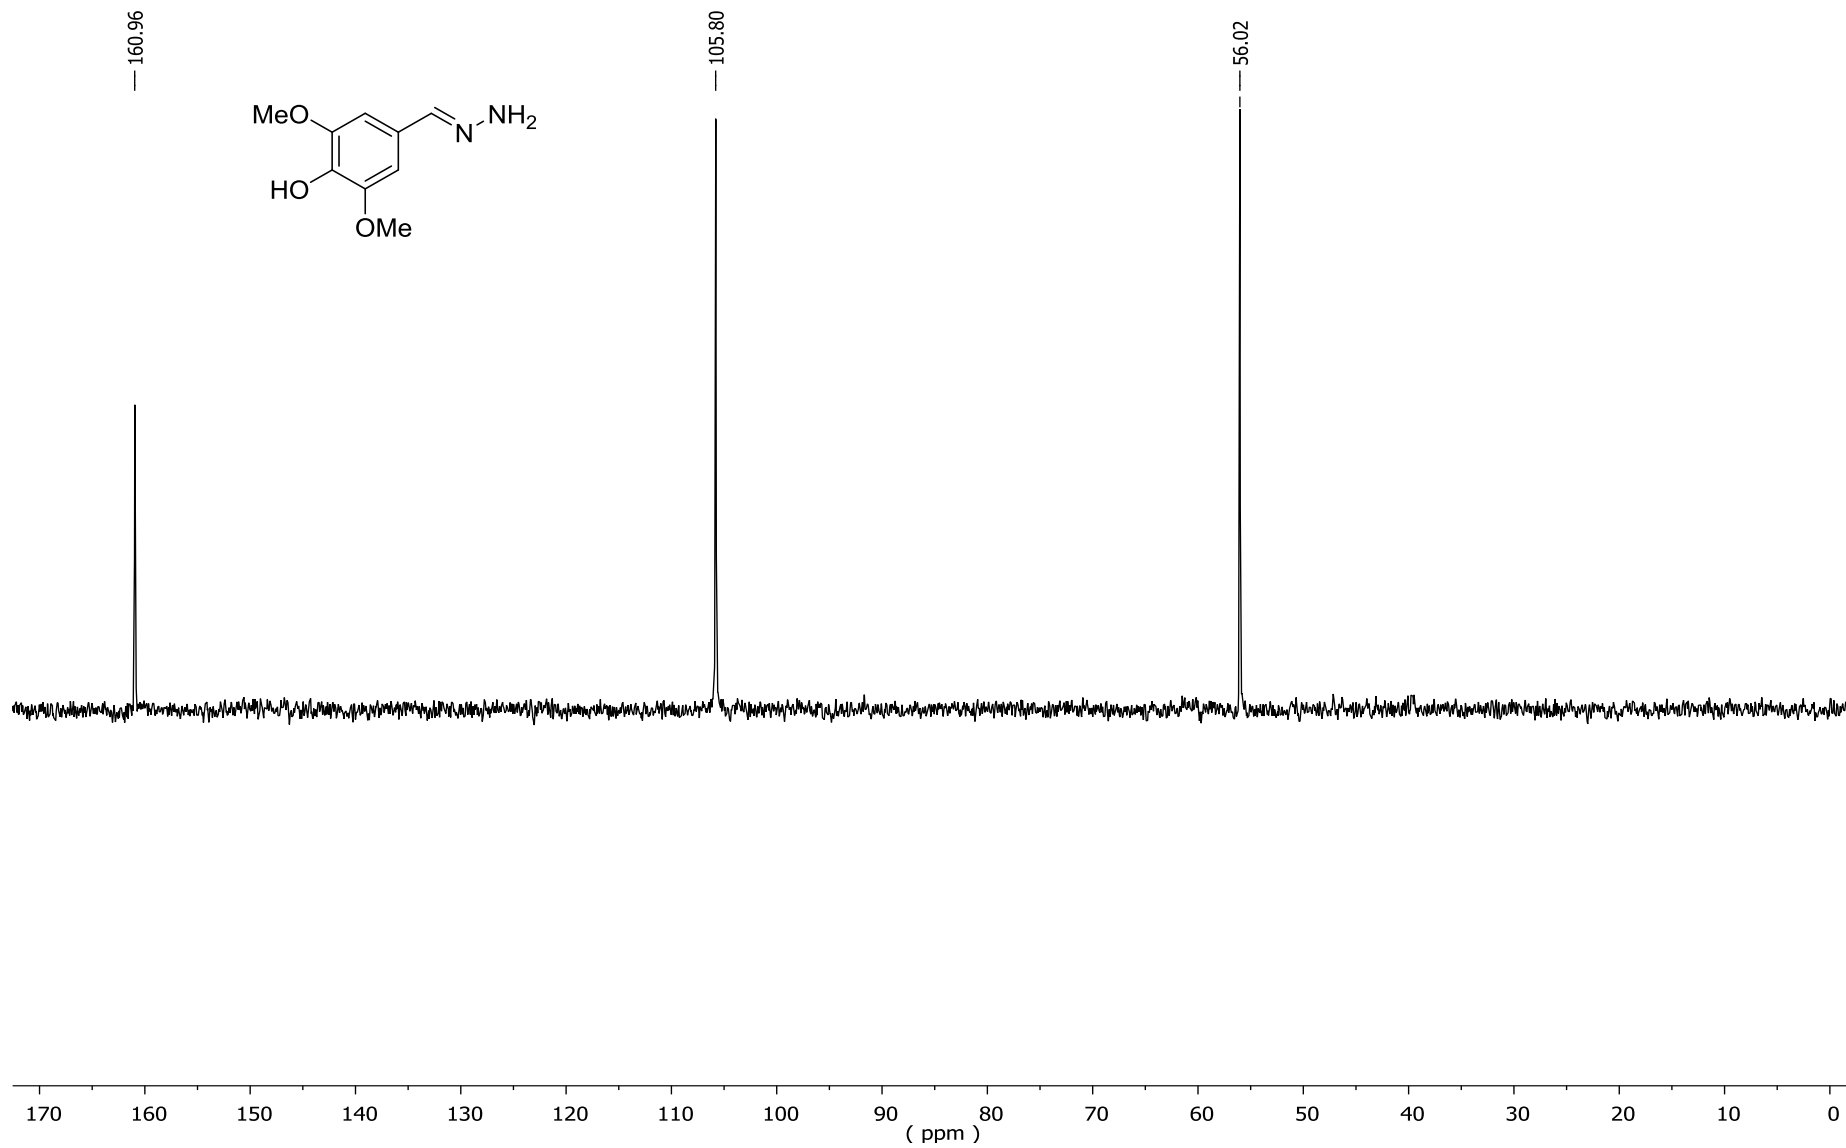

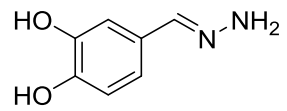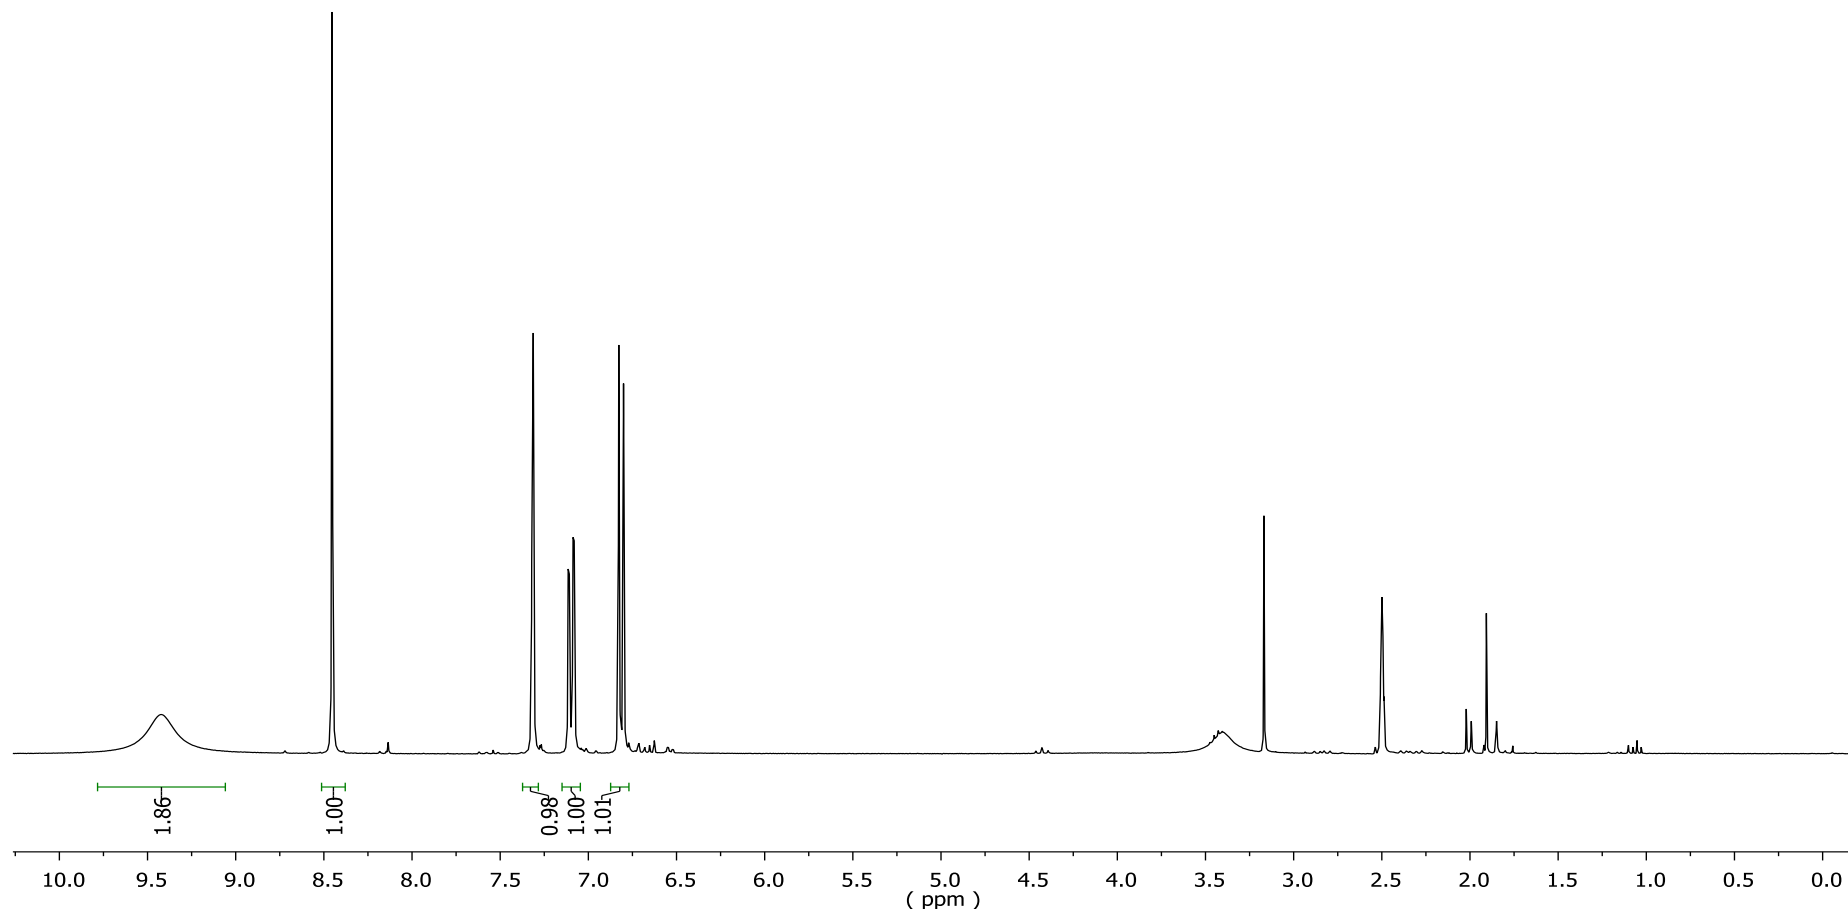

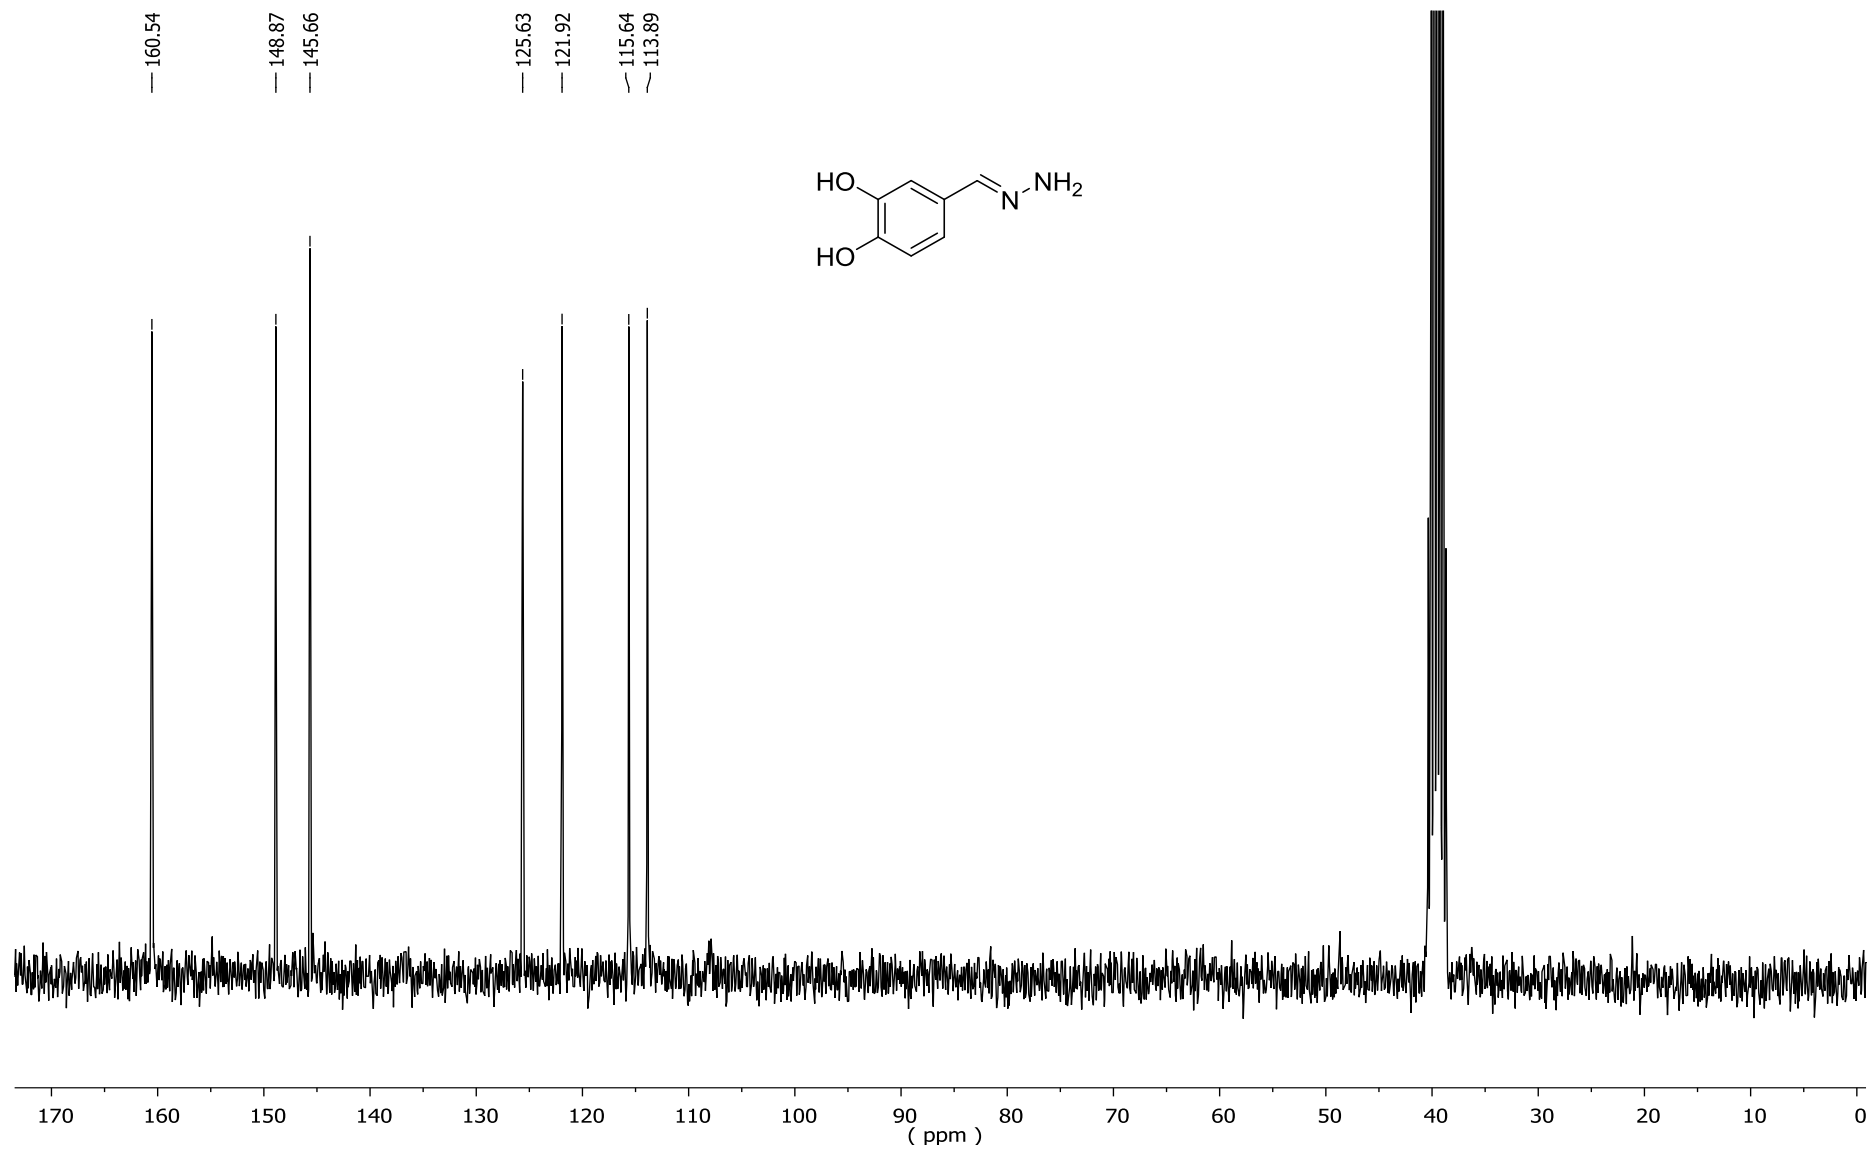

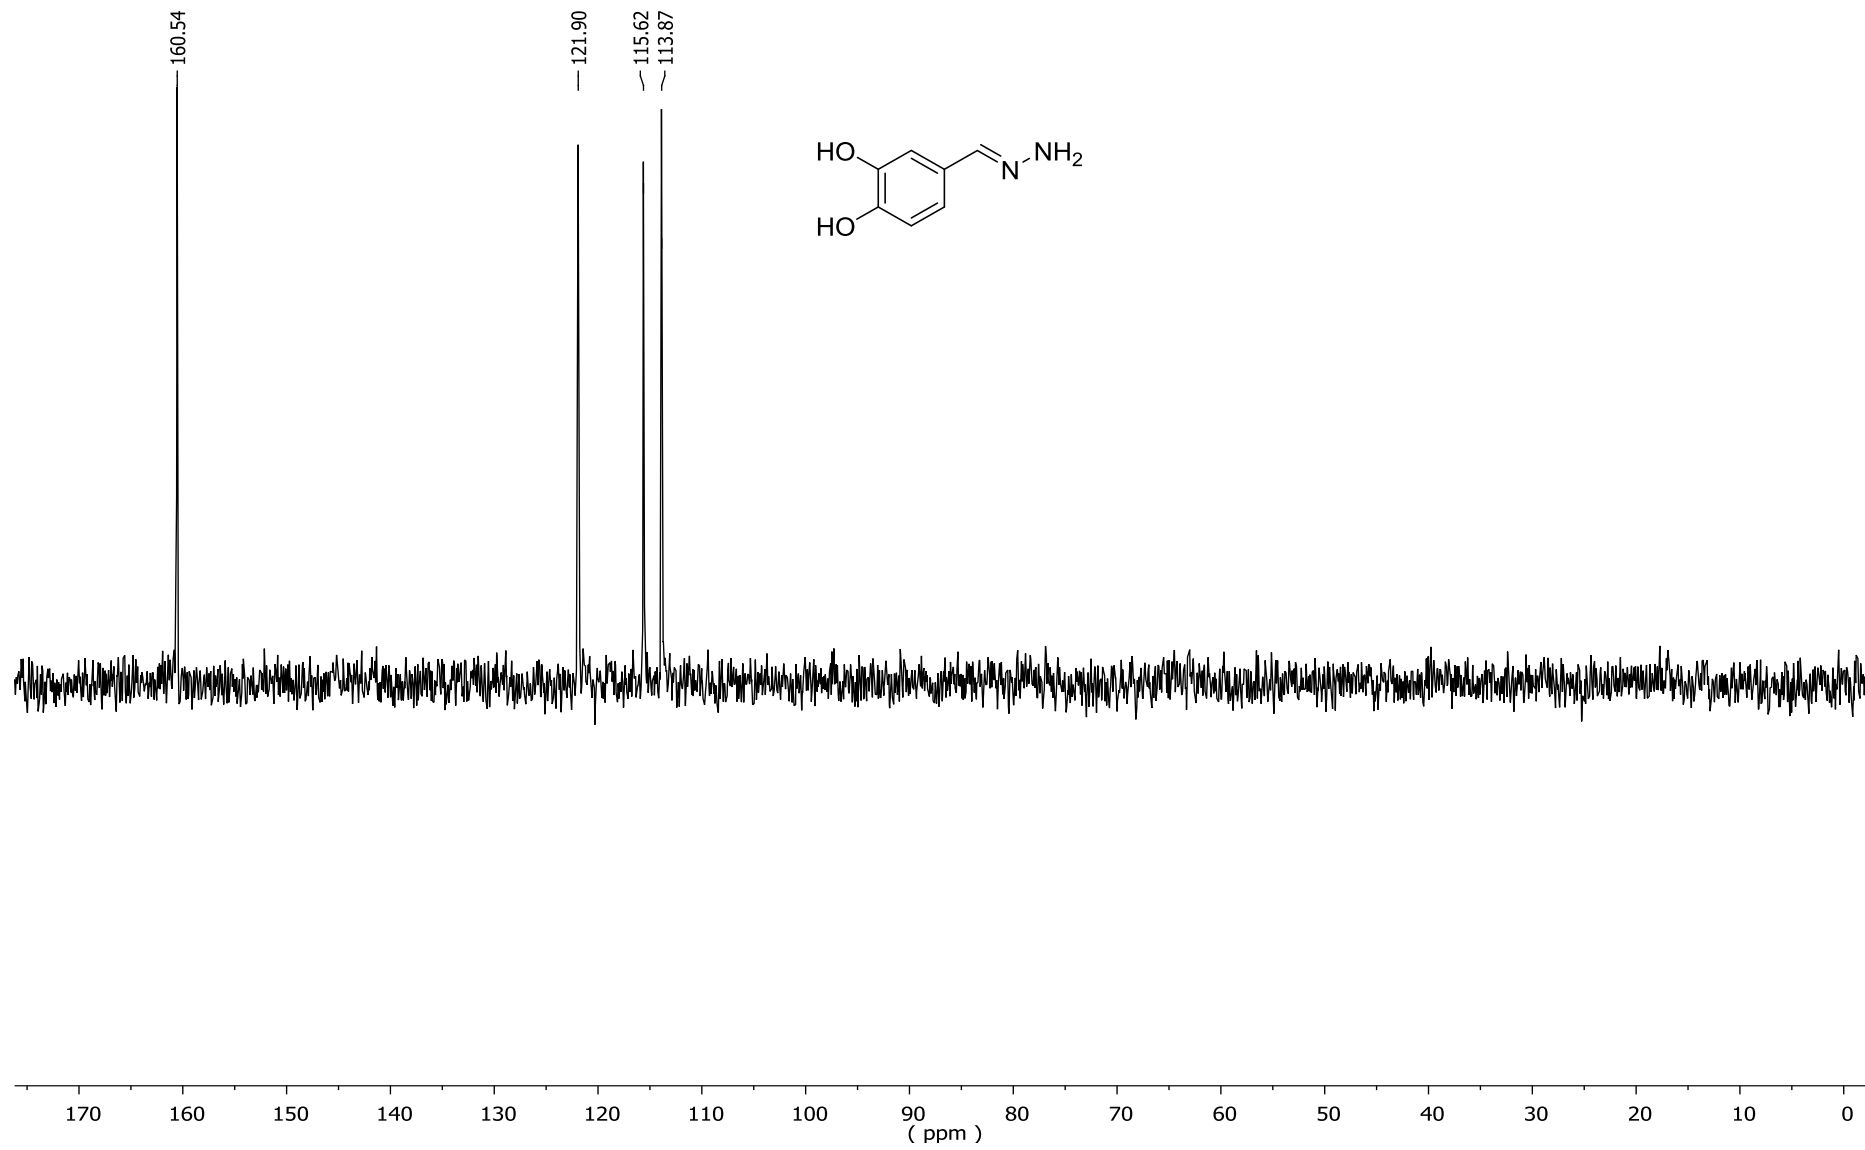

S40



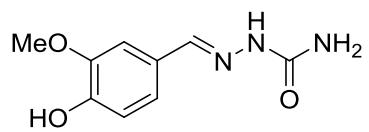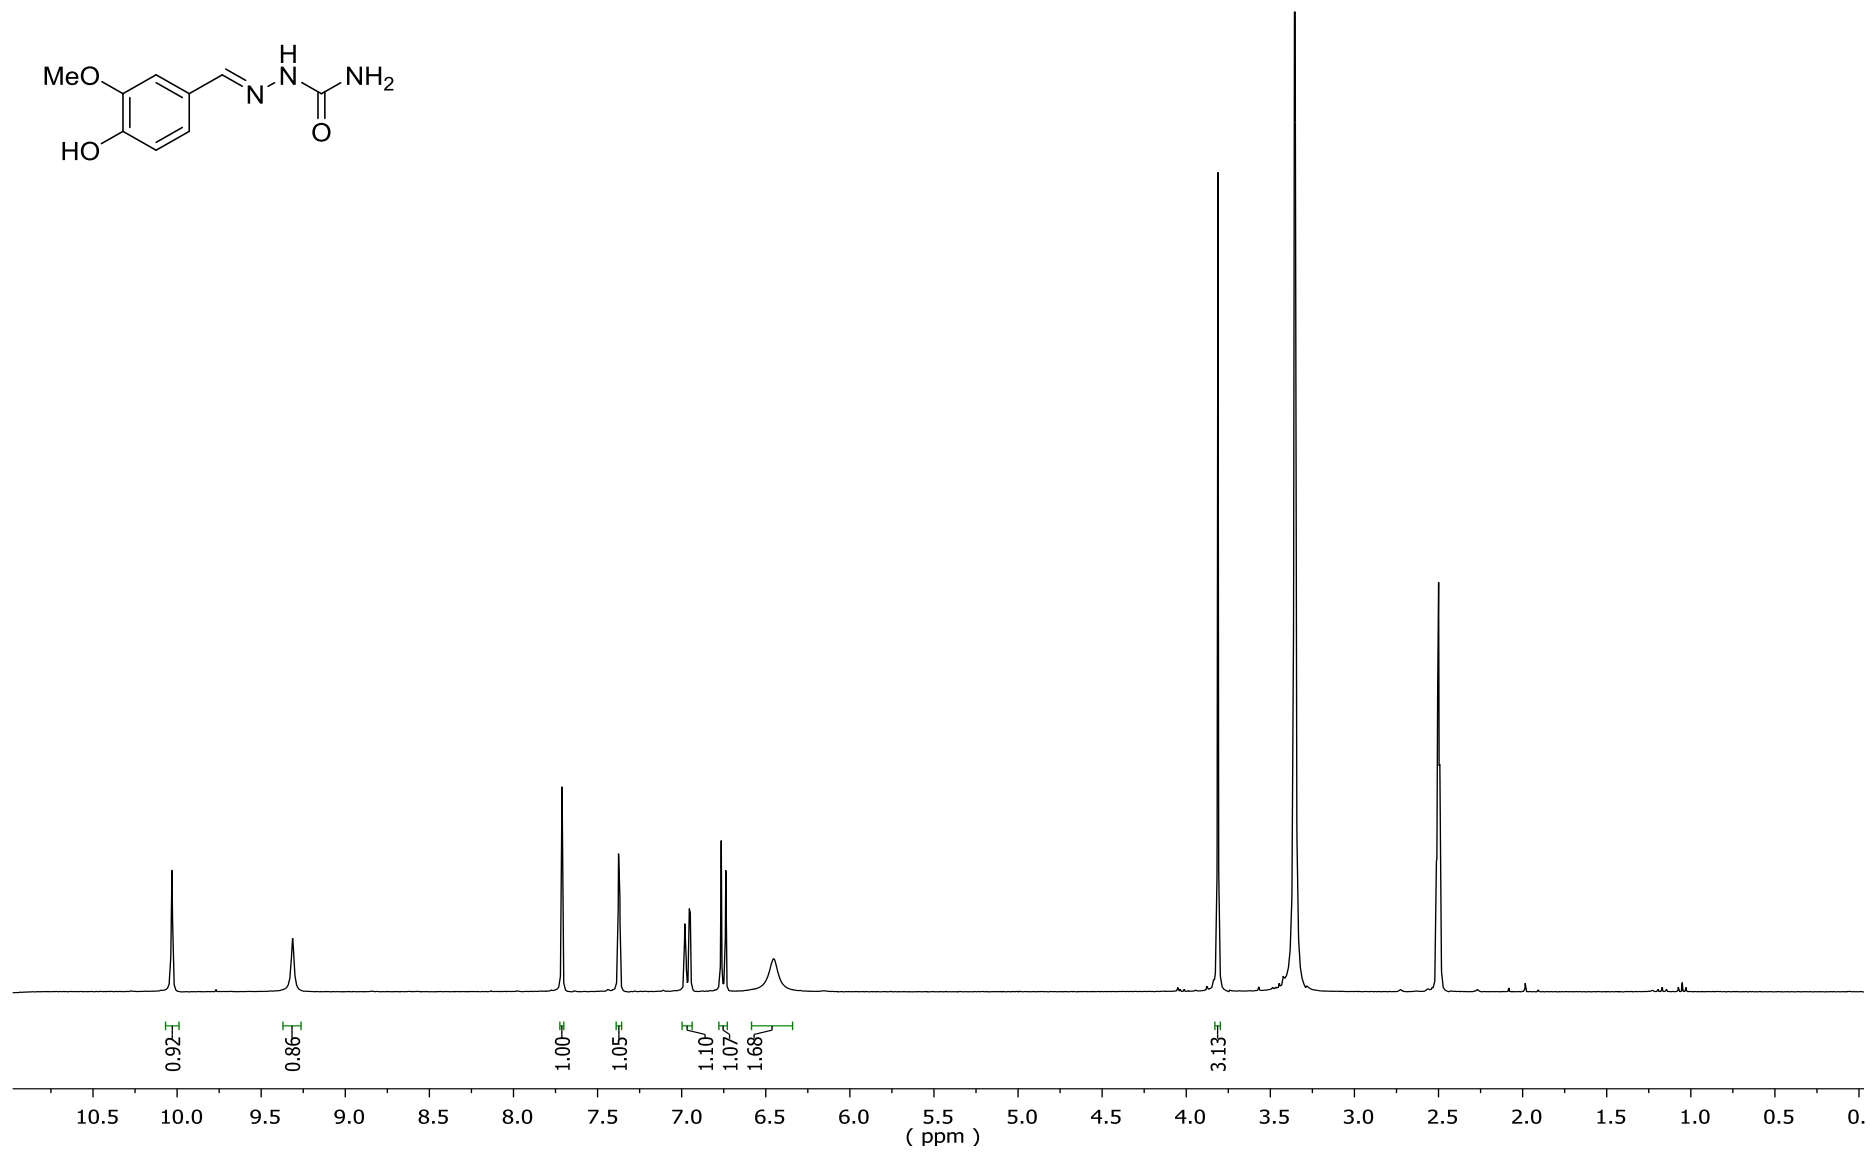

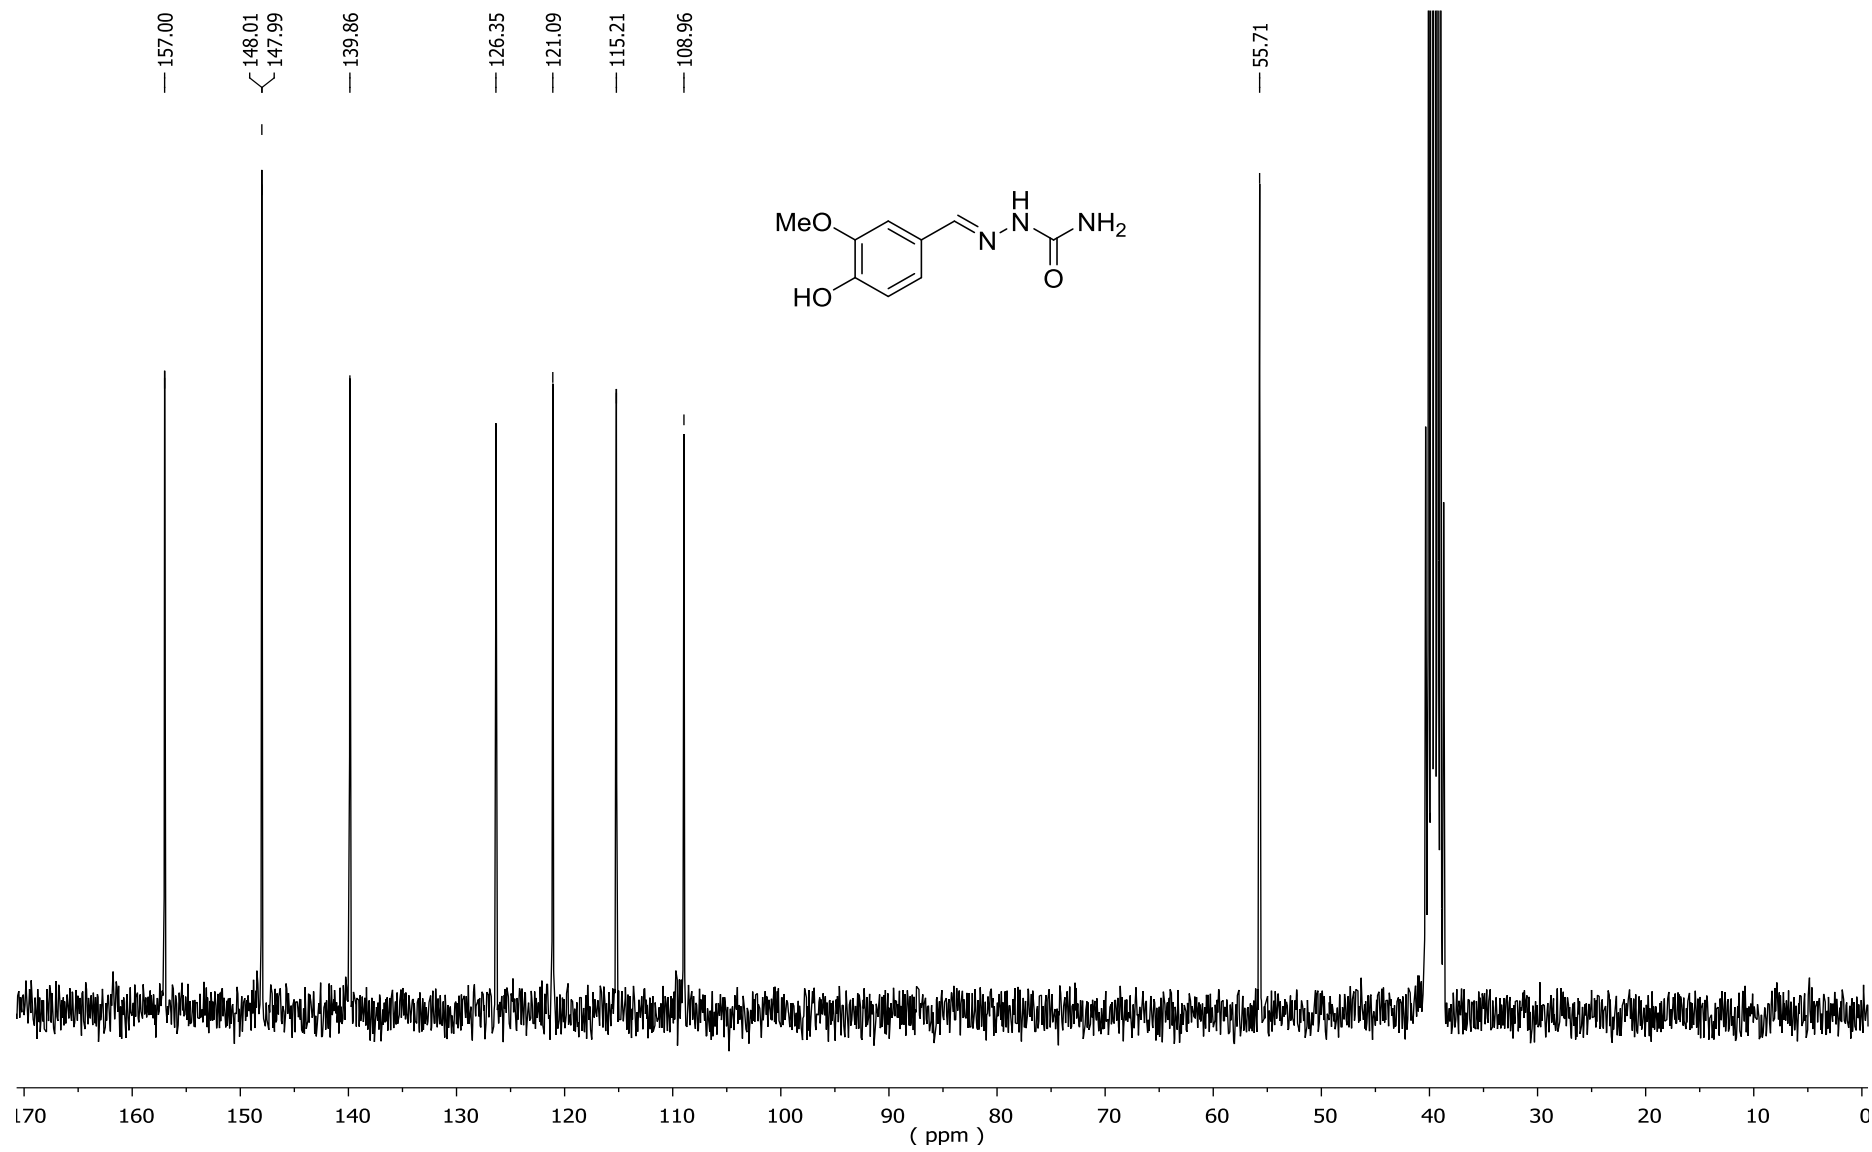

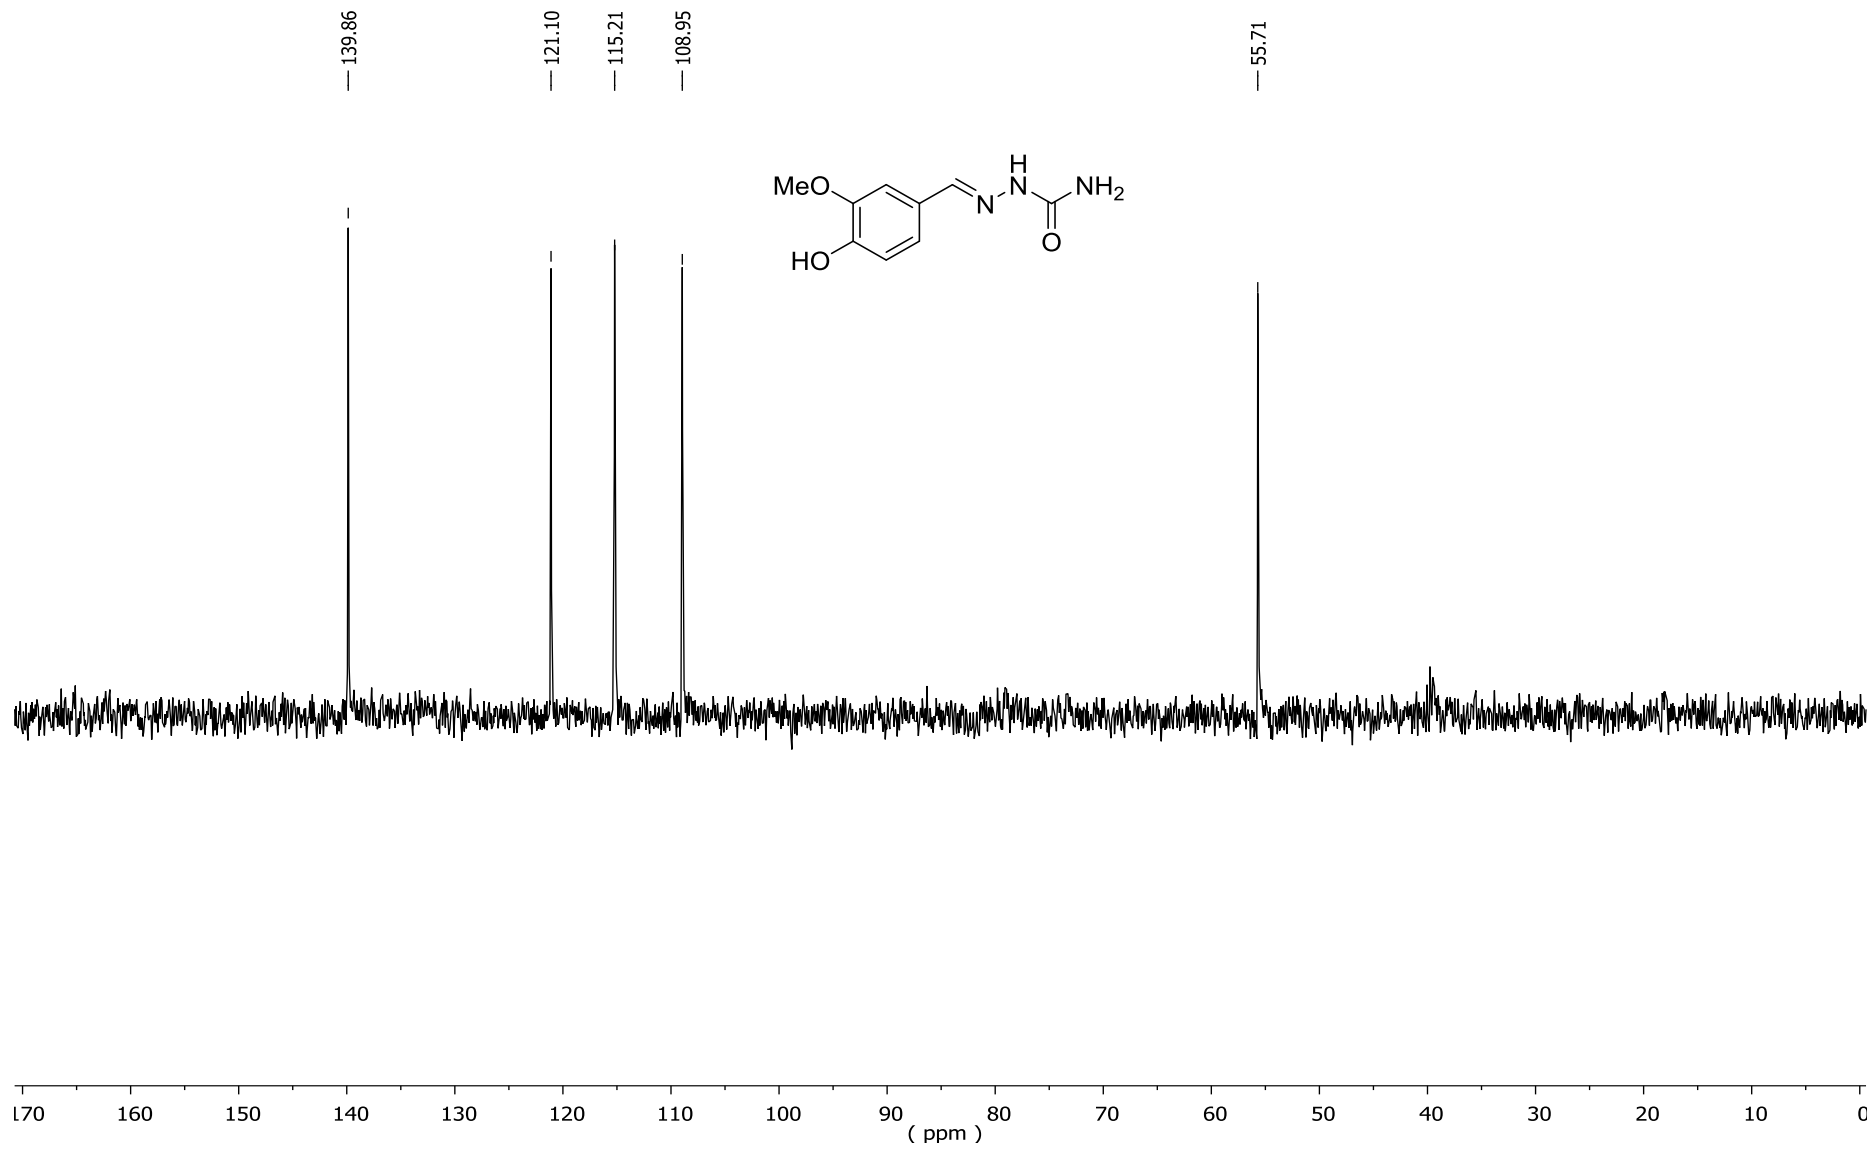

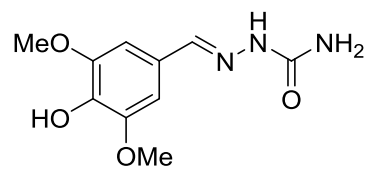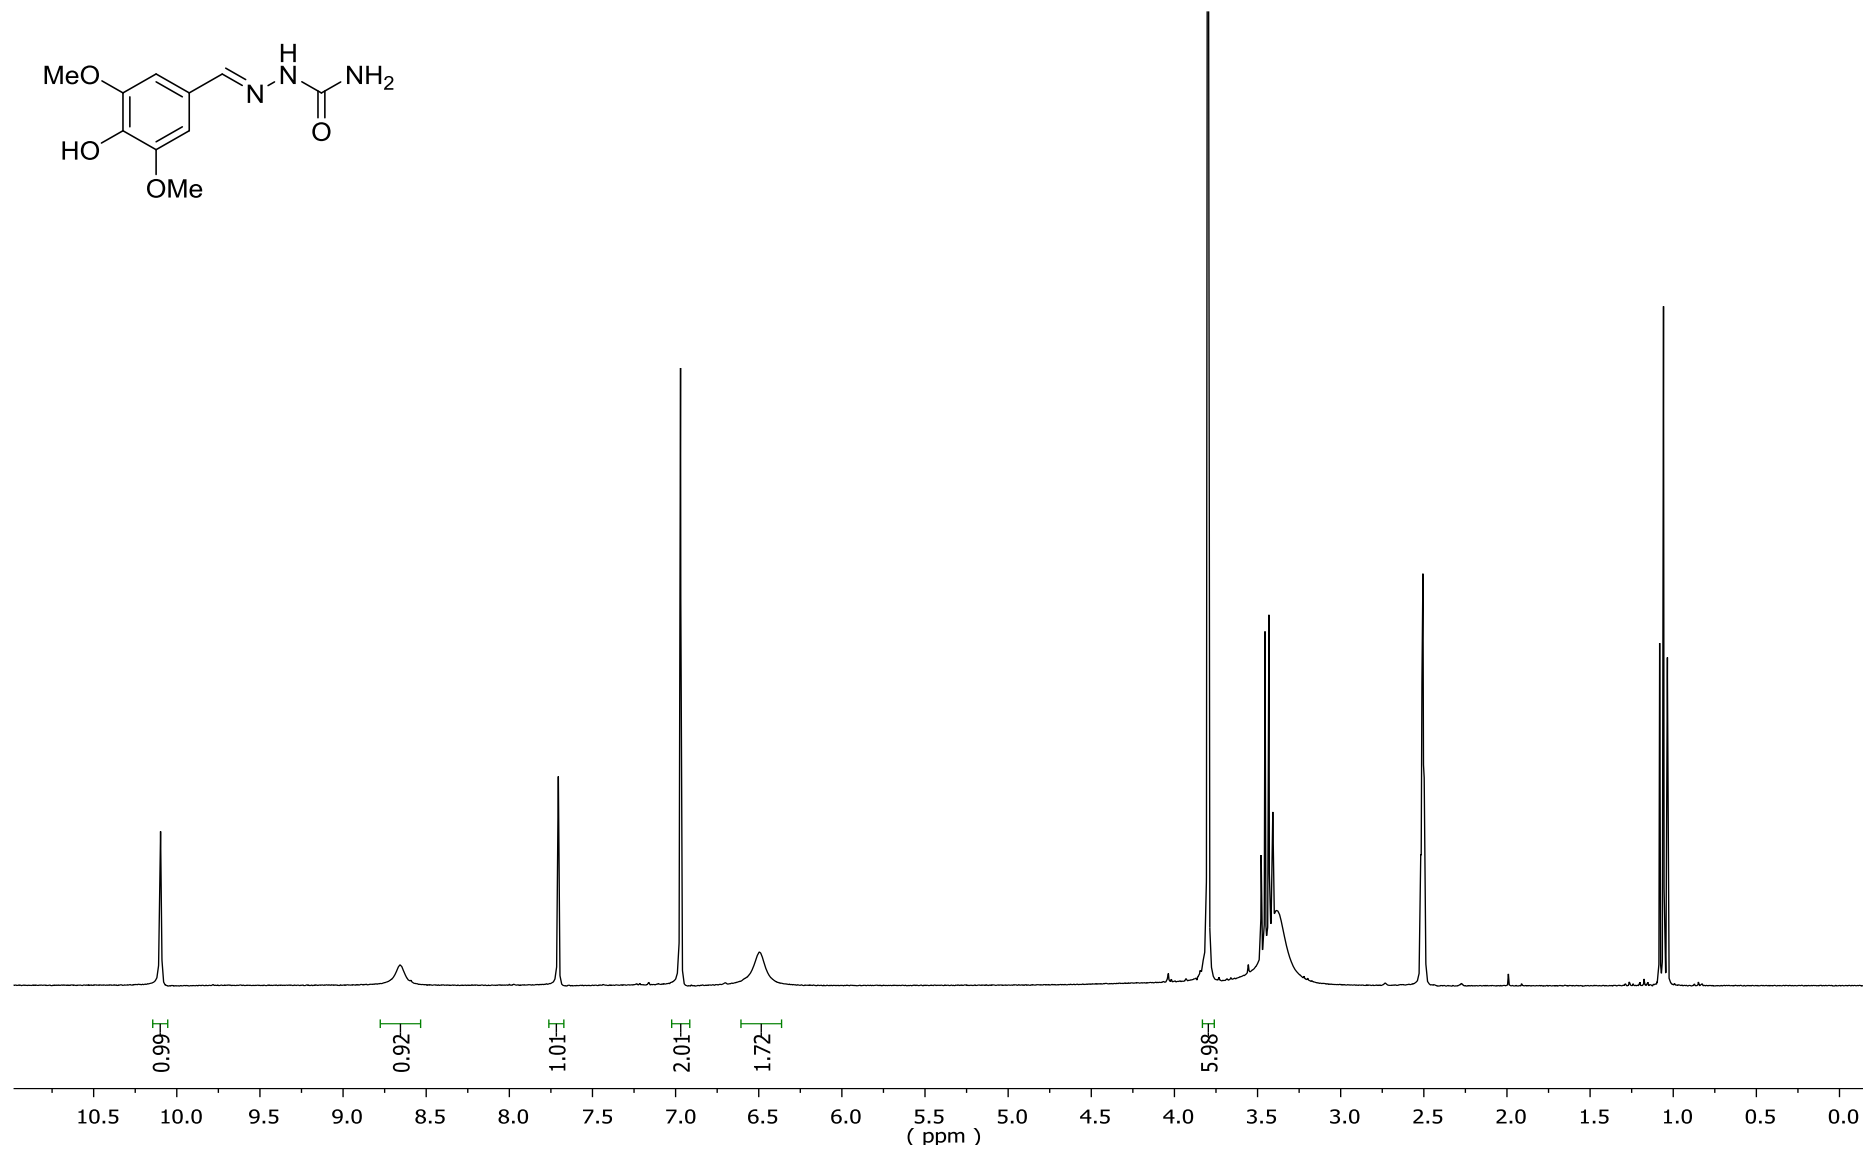

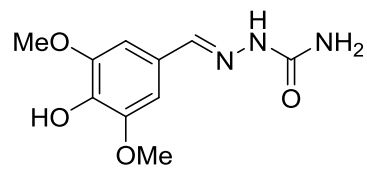

— 156.96

— 148.07

— 139.88

— 136.87

— 125.18

— 104.16

— 56.07

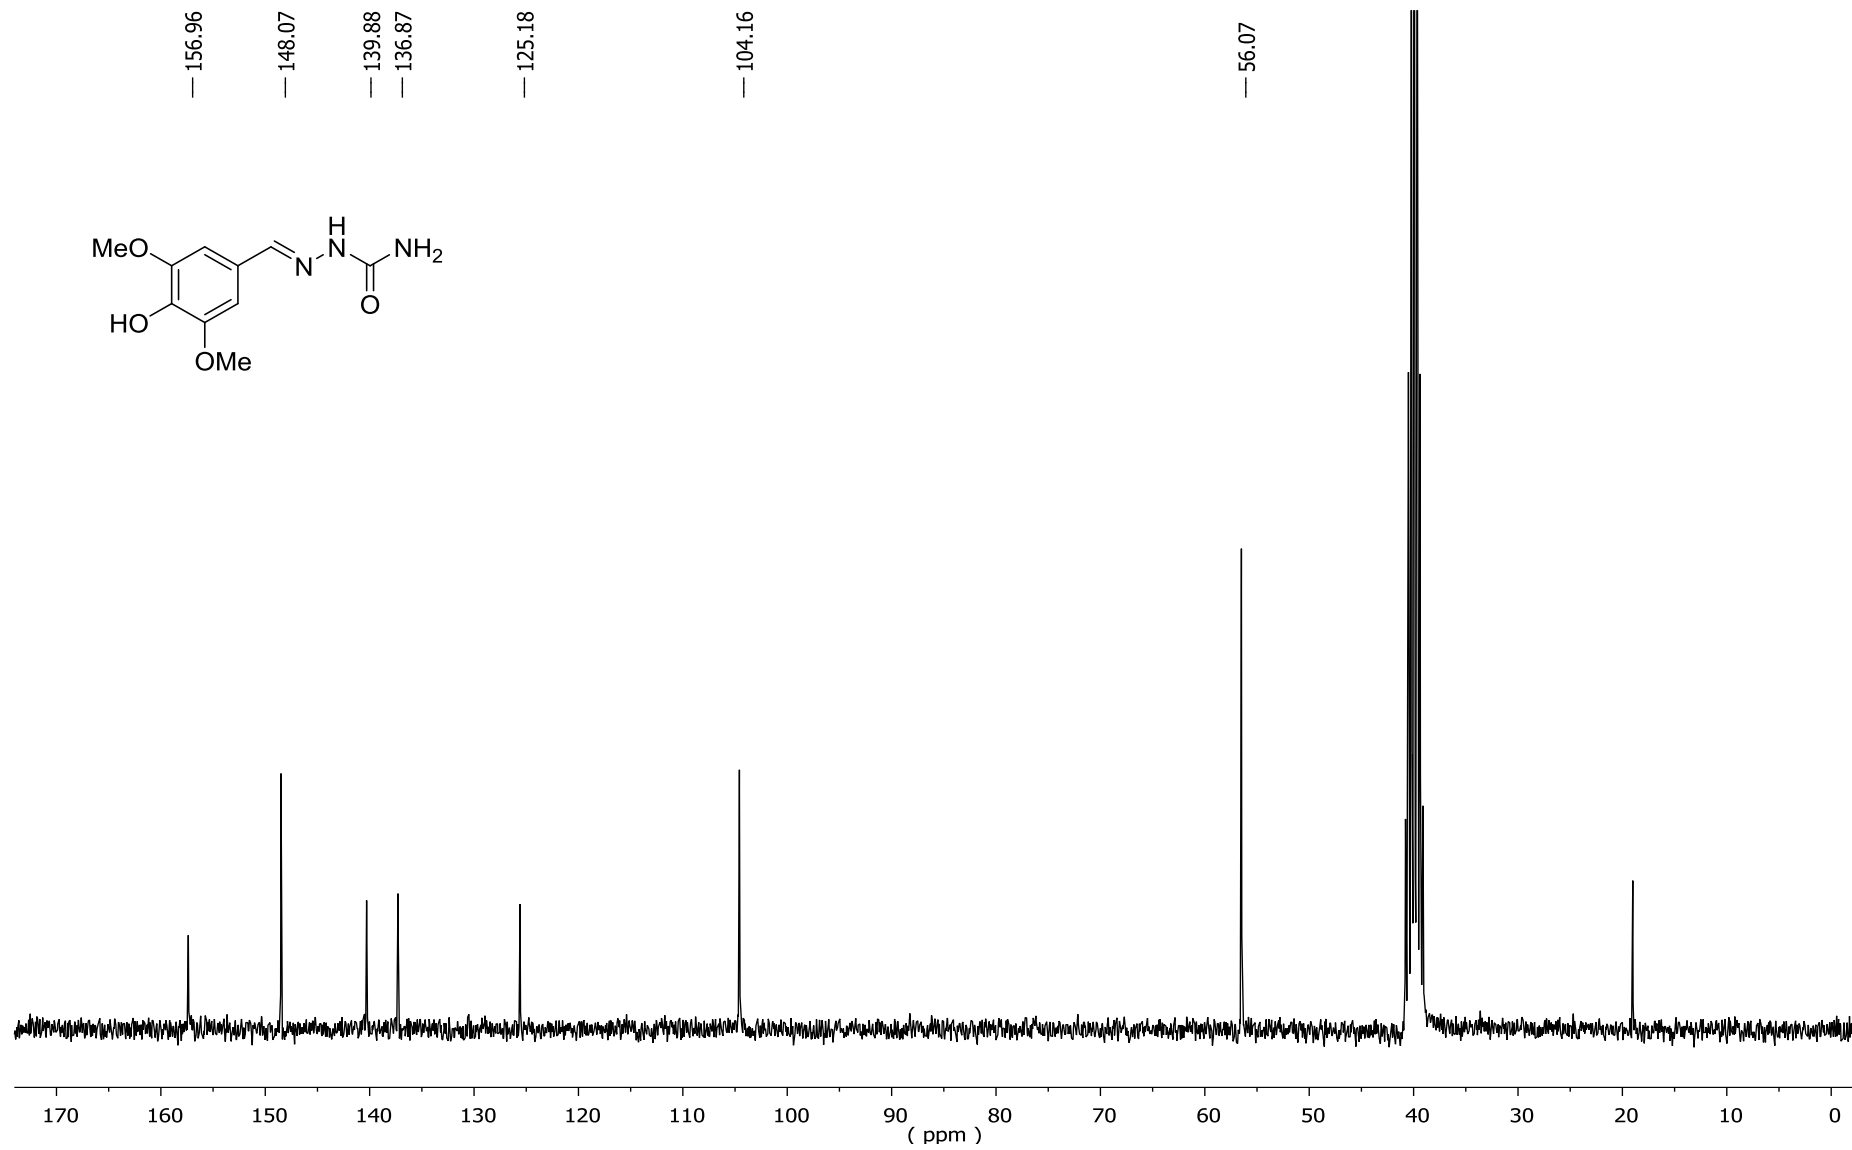

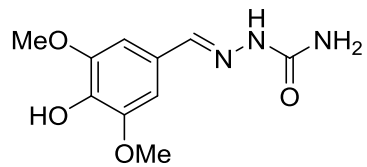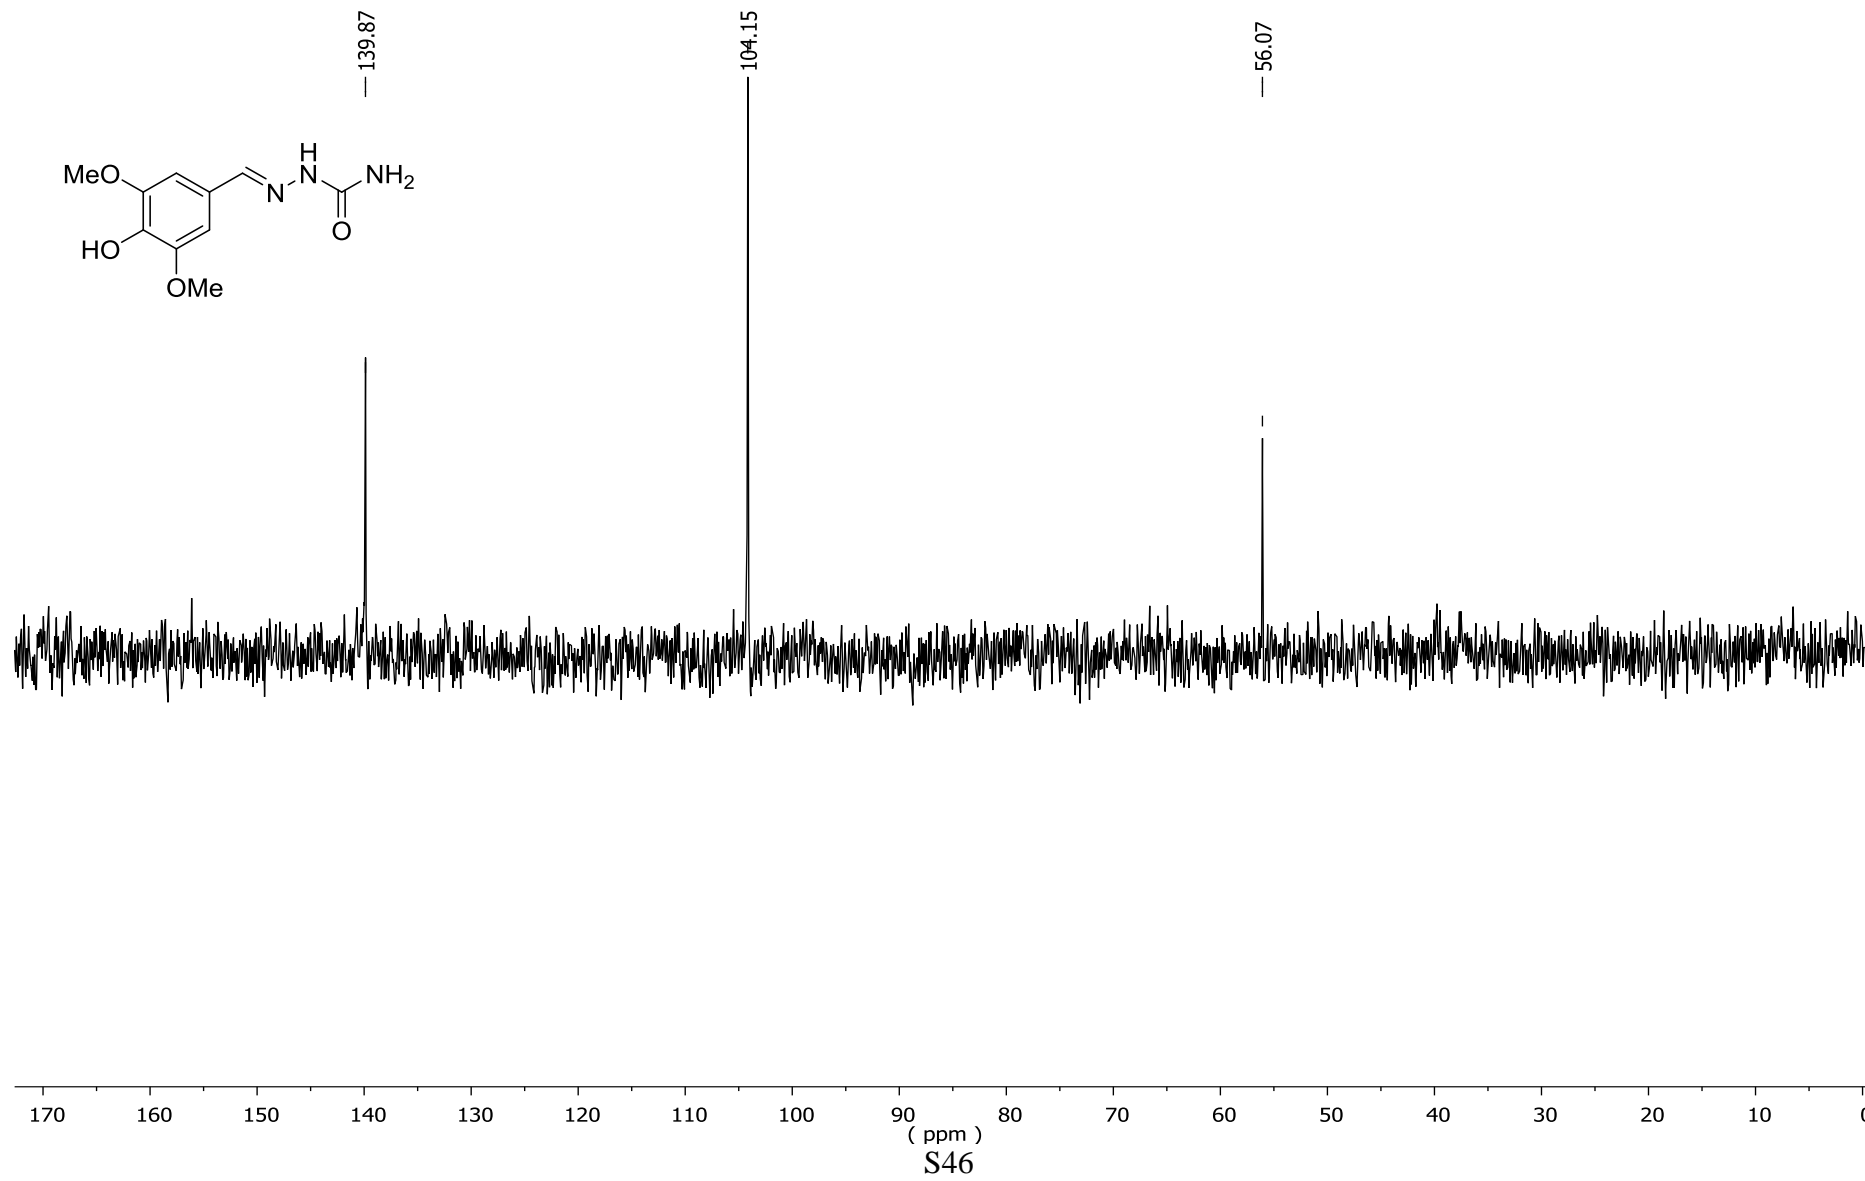

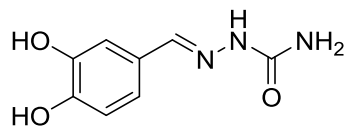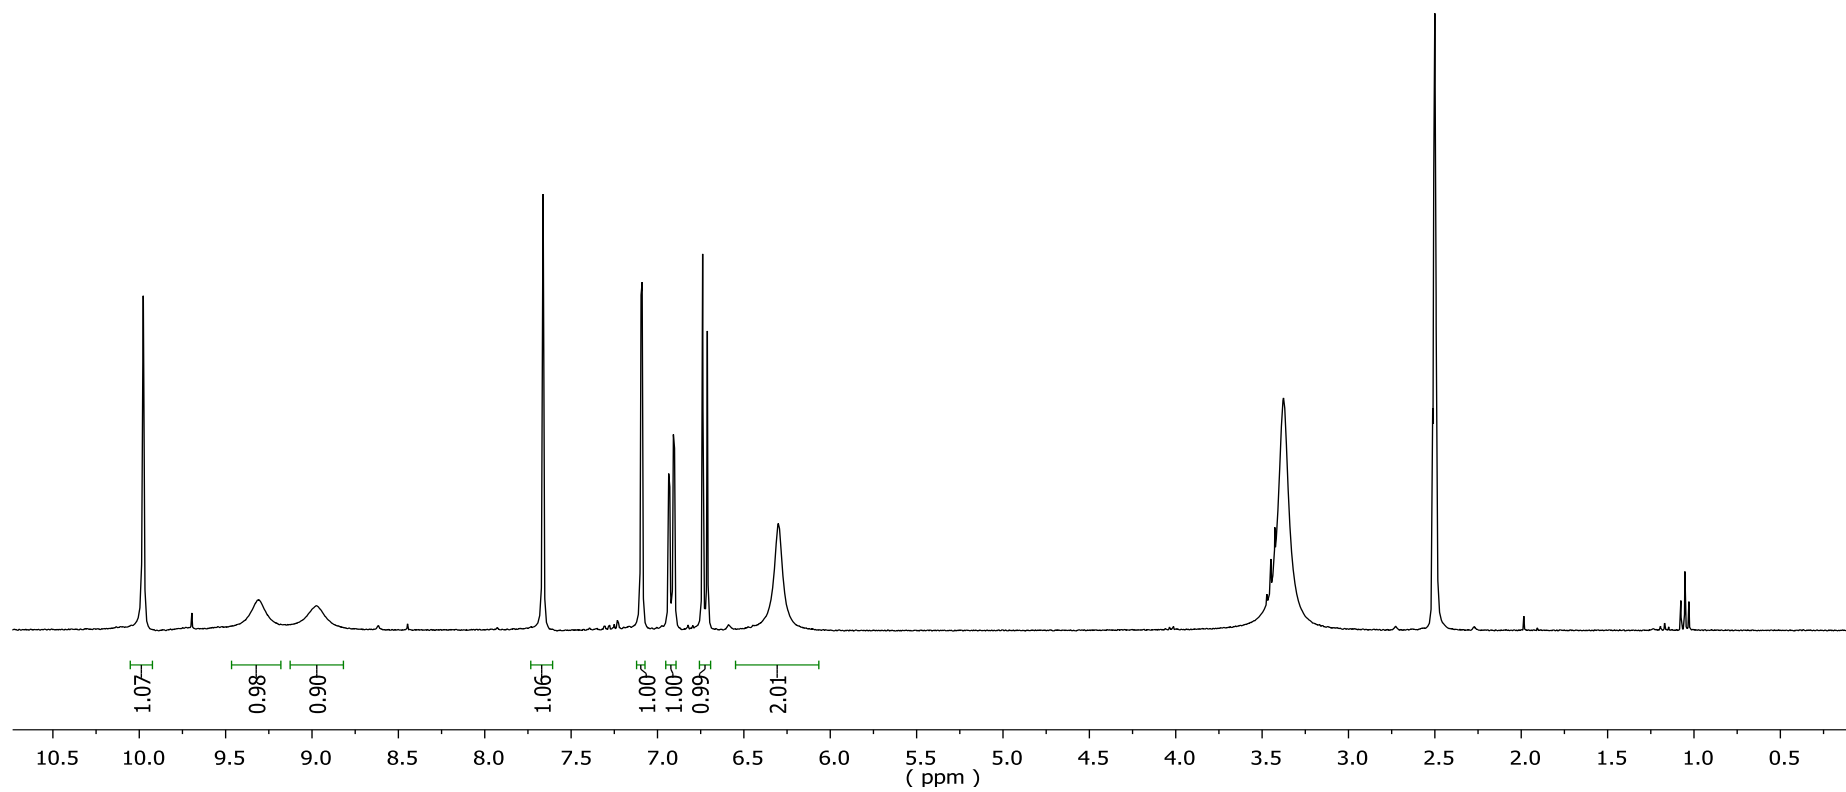

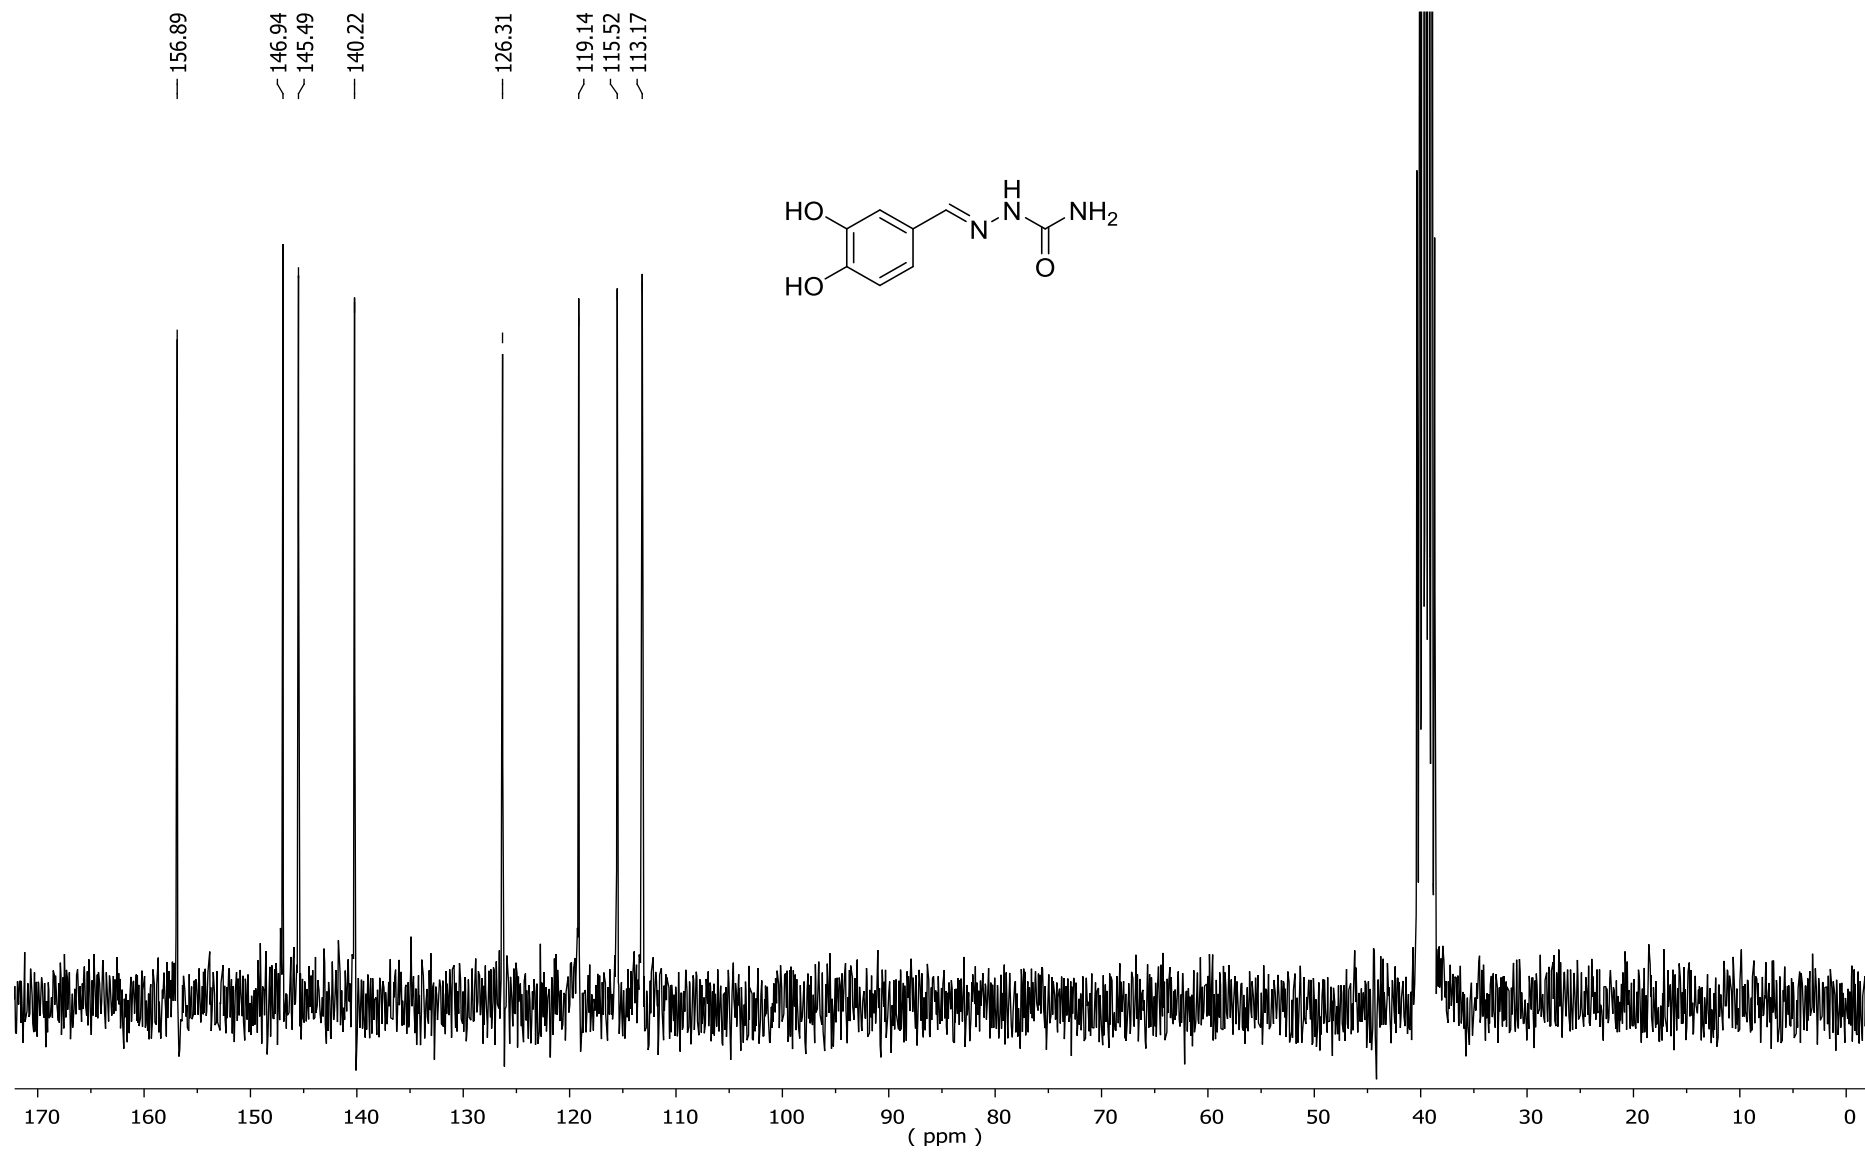



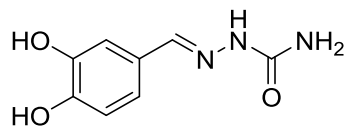

— 140.22  
~ 119.15  
~ 115.52  
~ 113.18

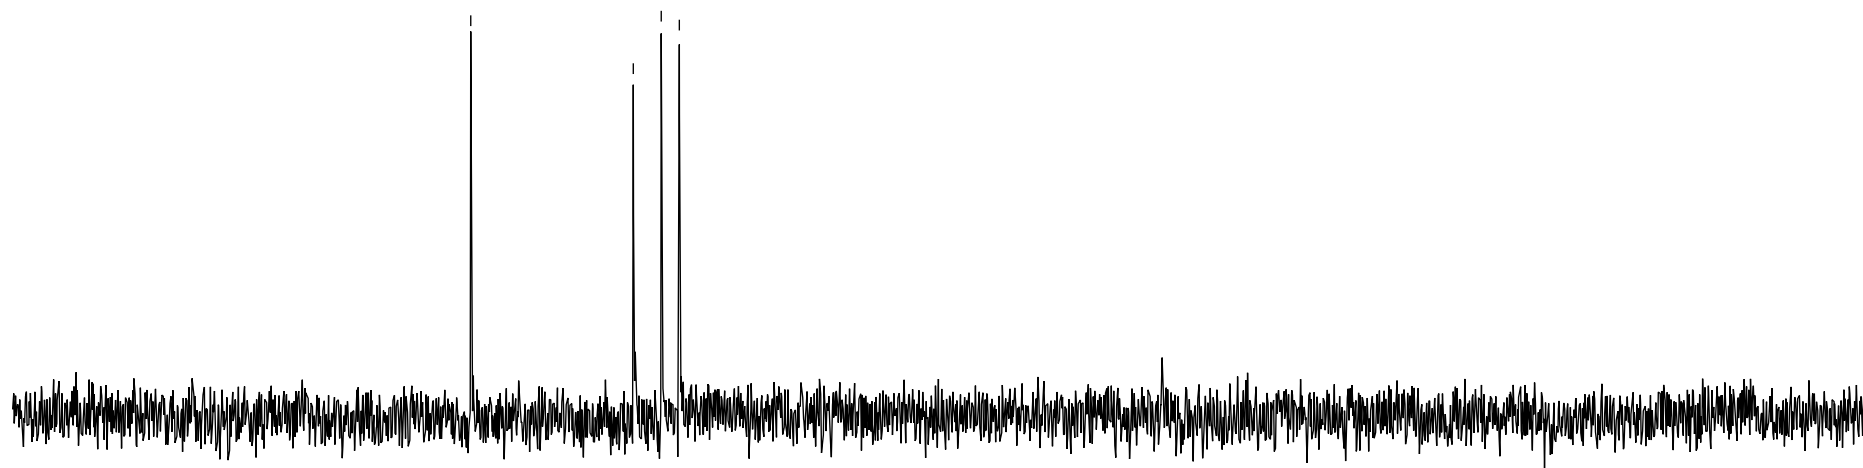

190 180 170 160 150 140 130 120 110 100 90 80 70 60 50 40 30 20 10 0 -10 -20 -30 -4  
( ppm )

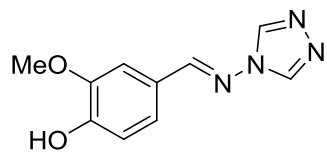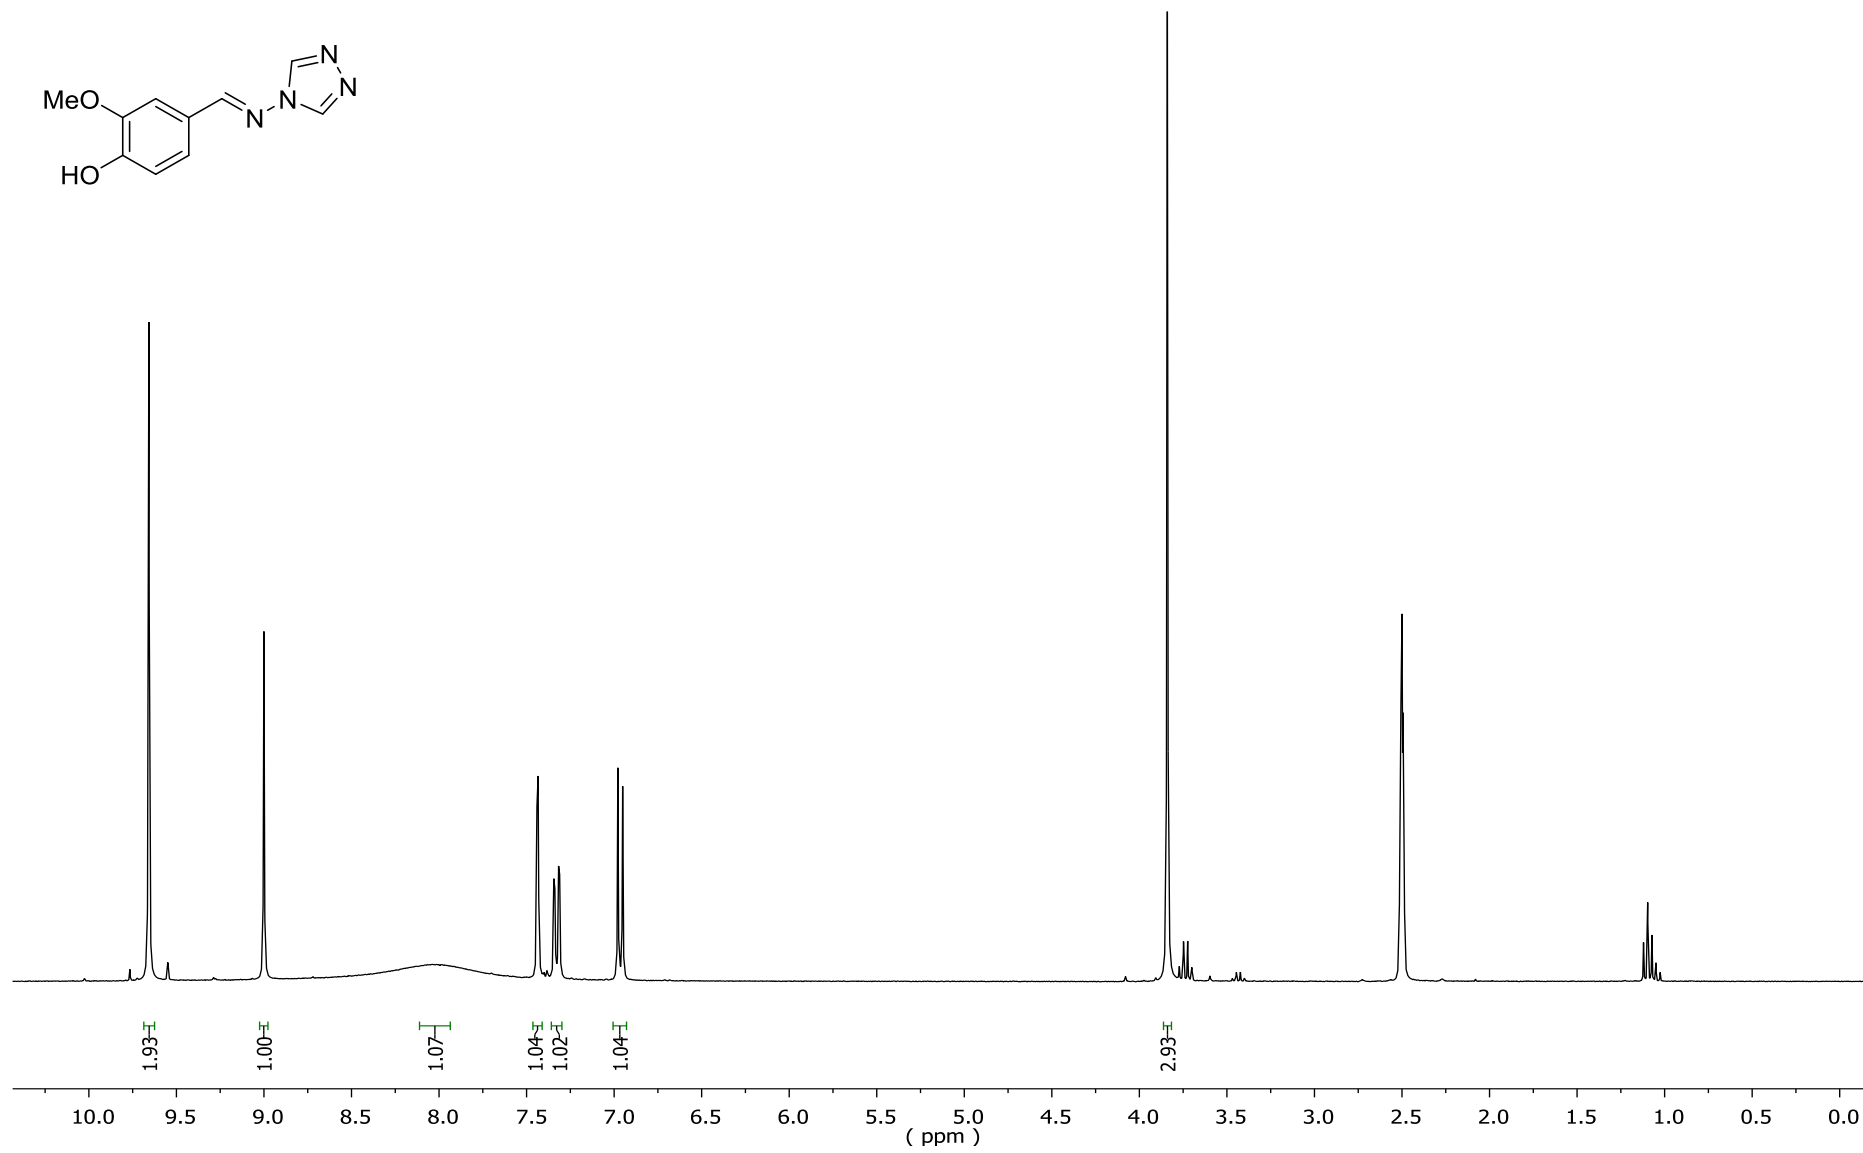

S50

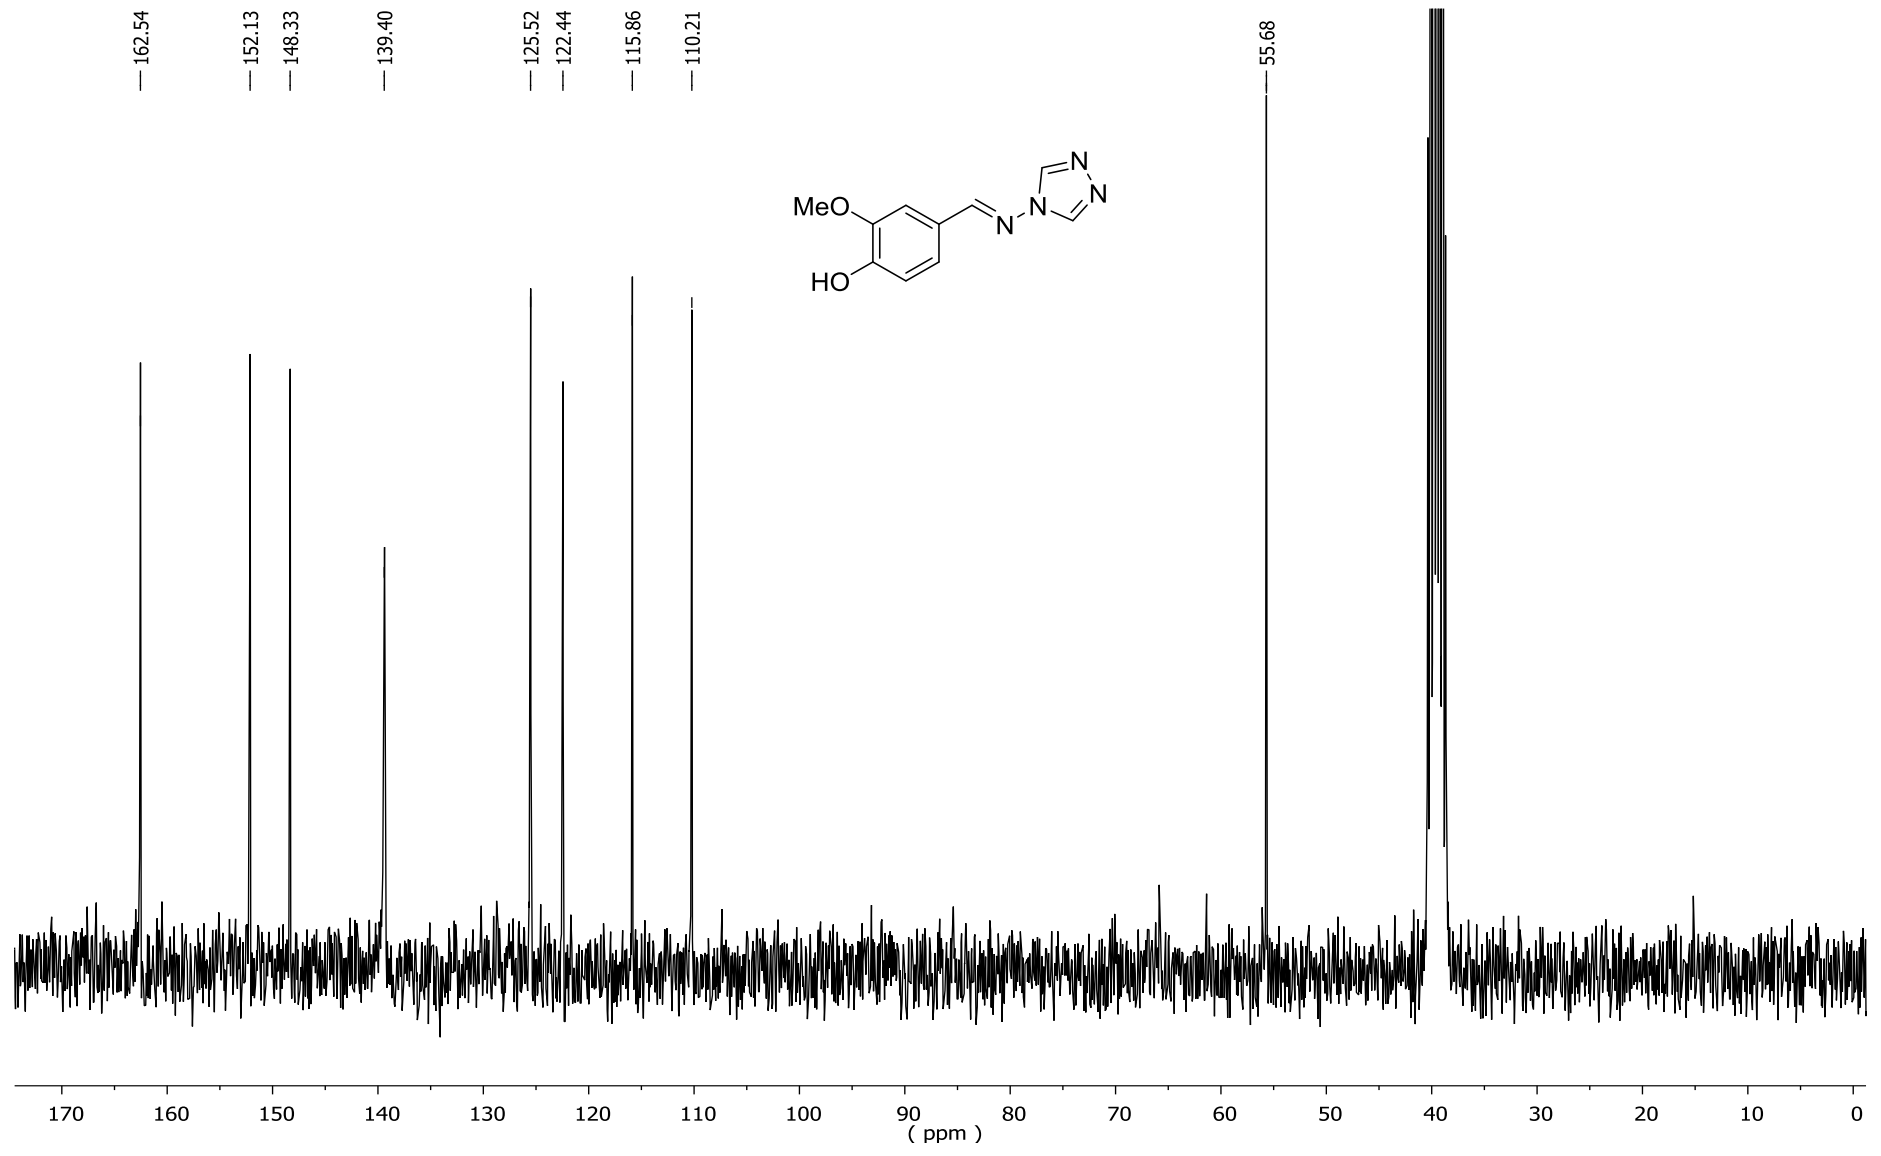

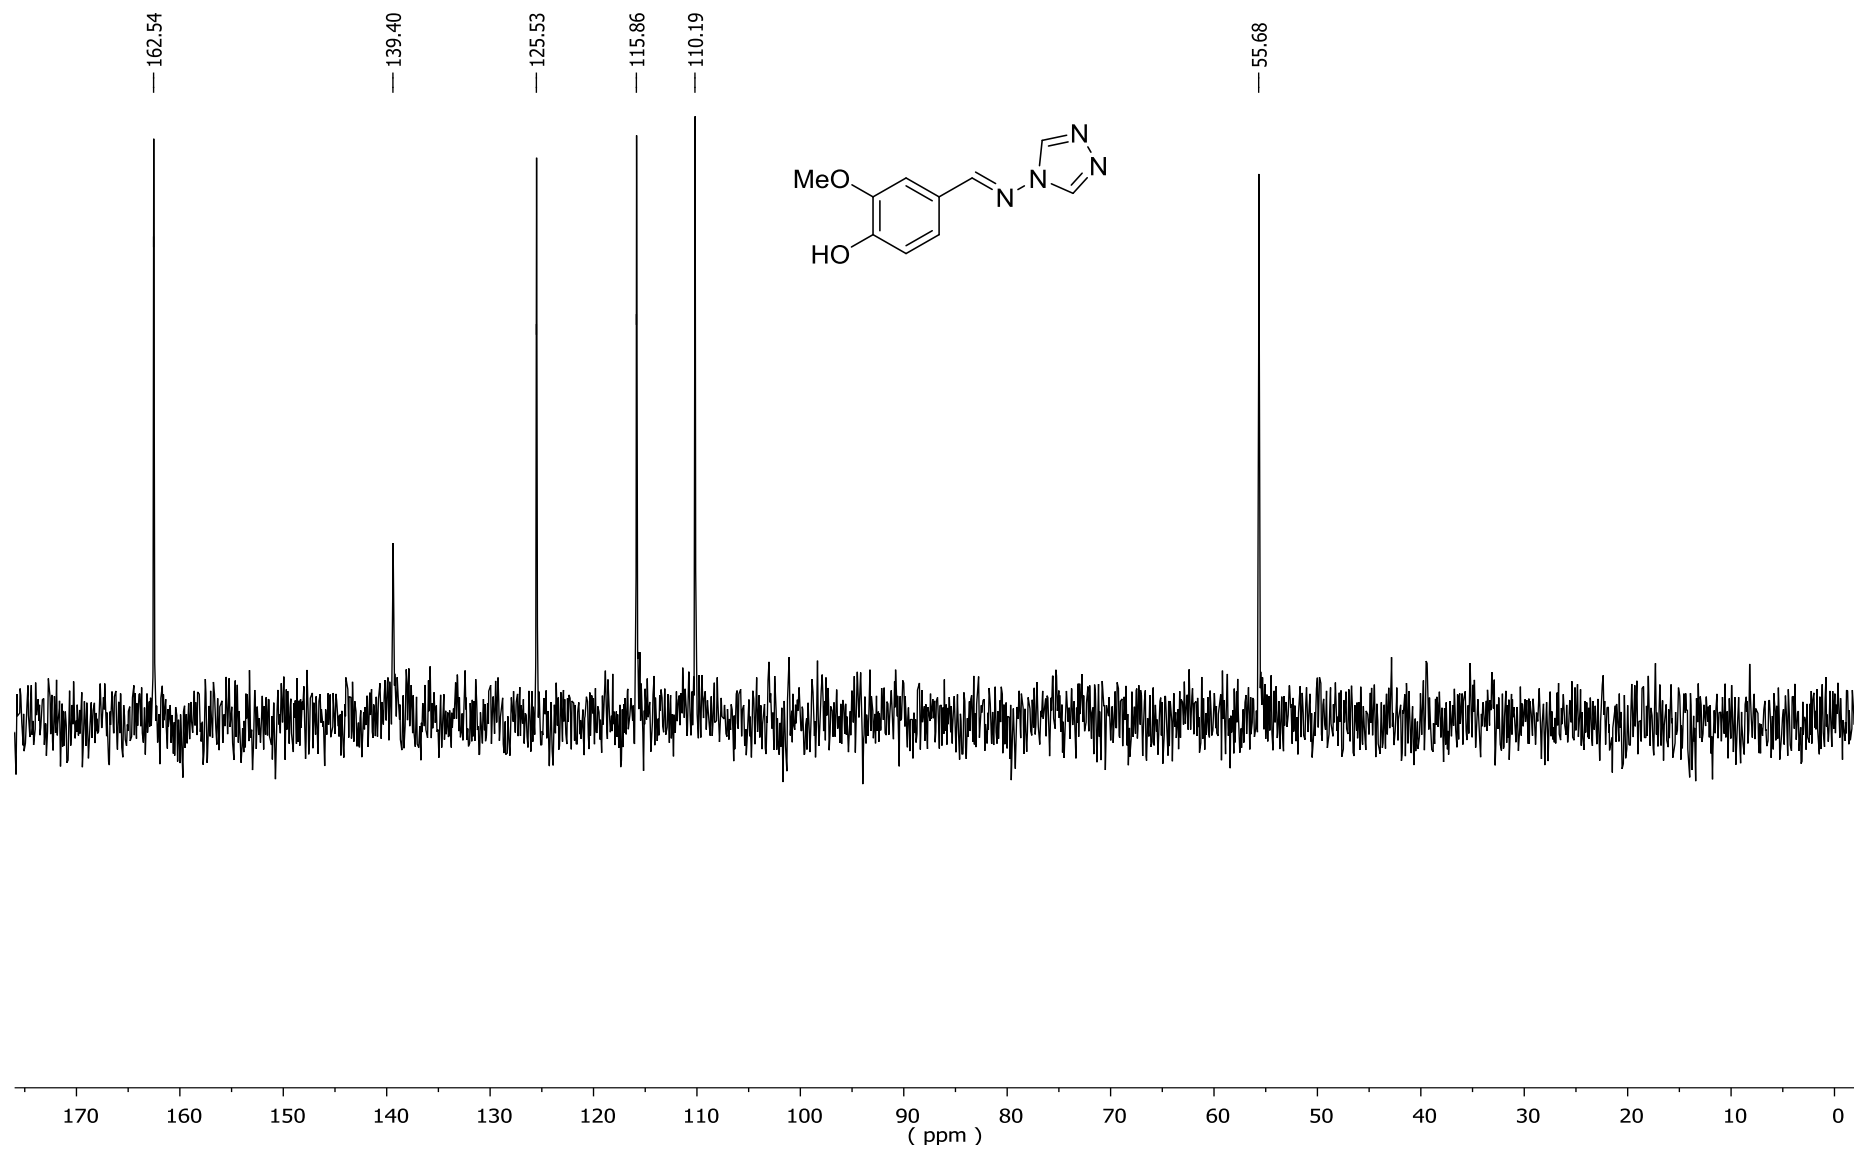

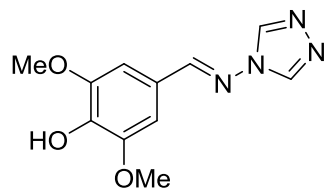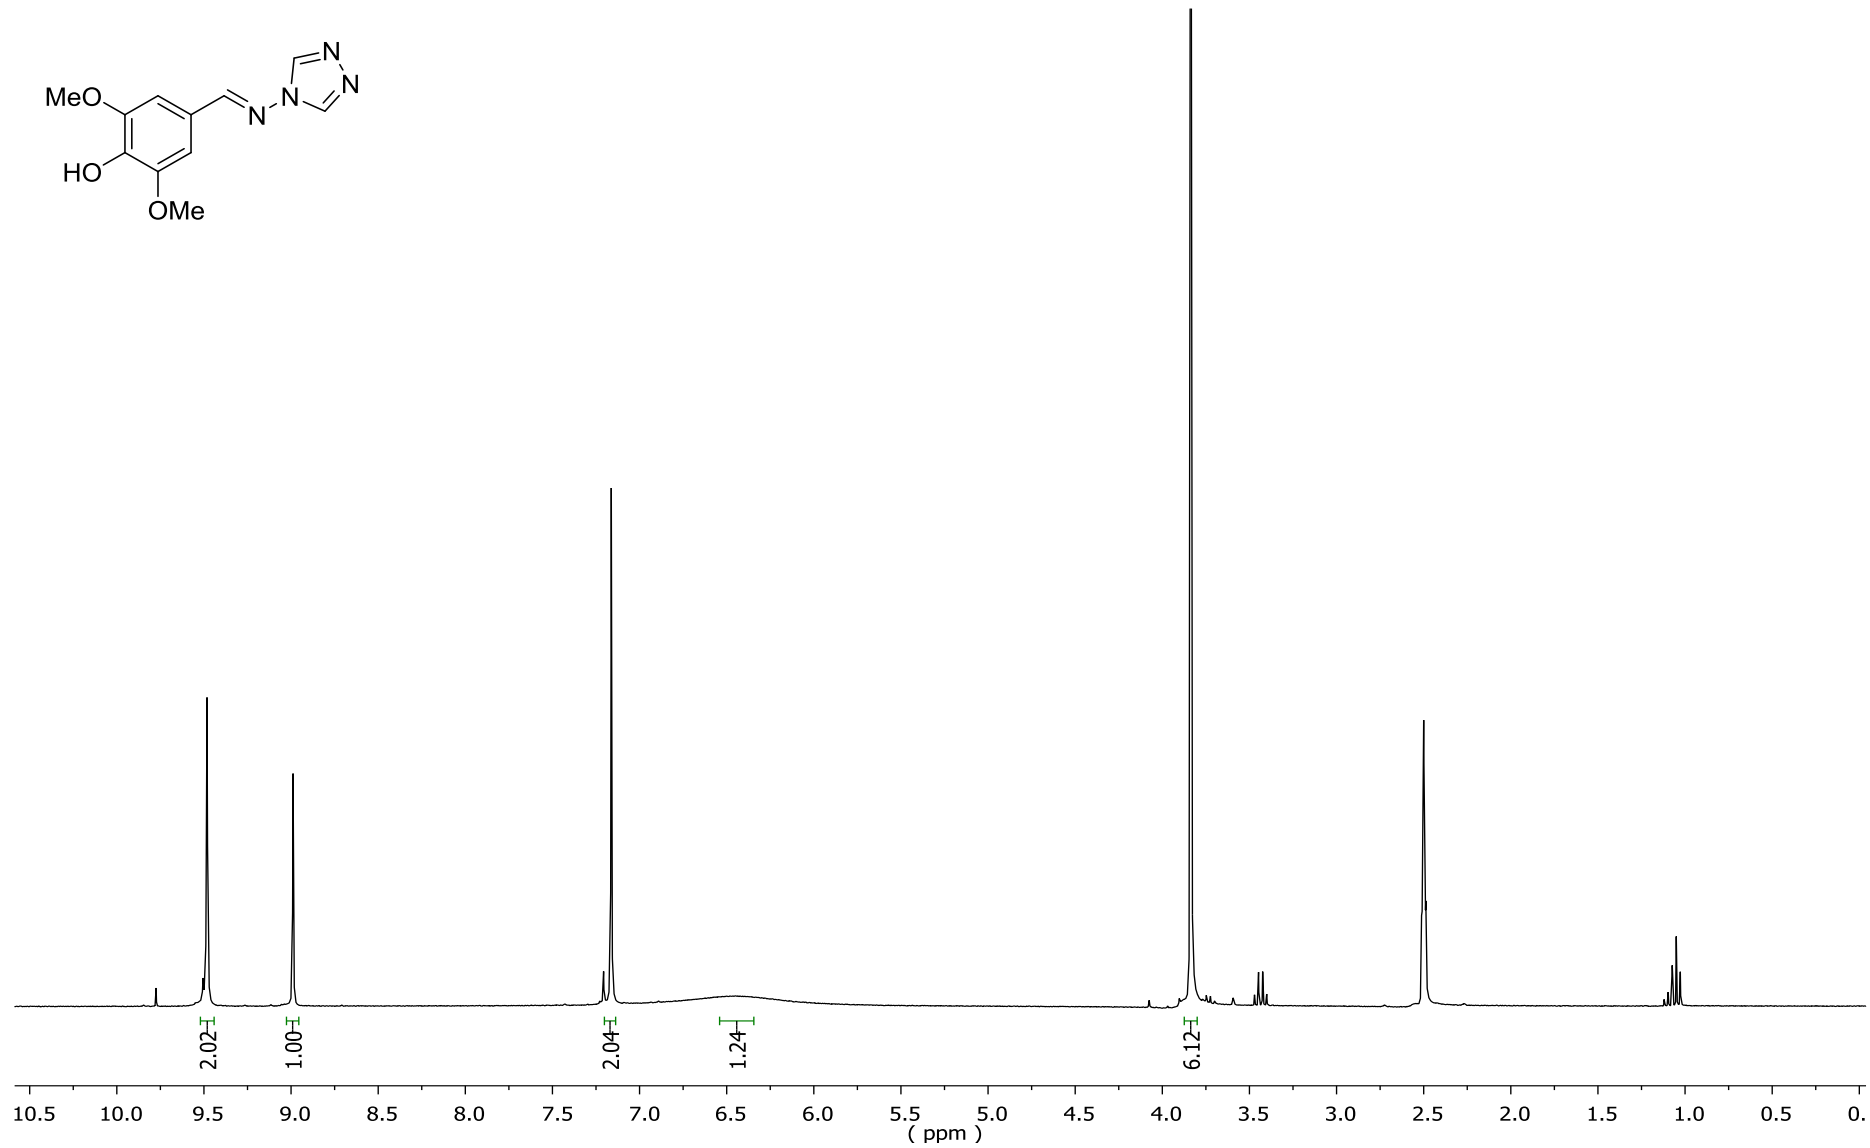

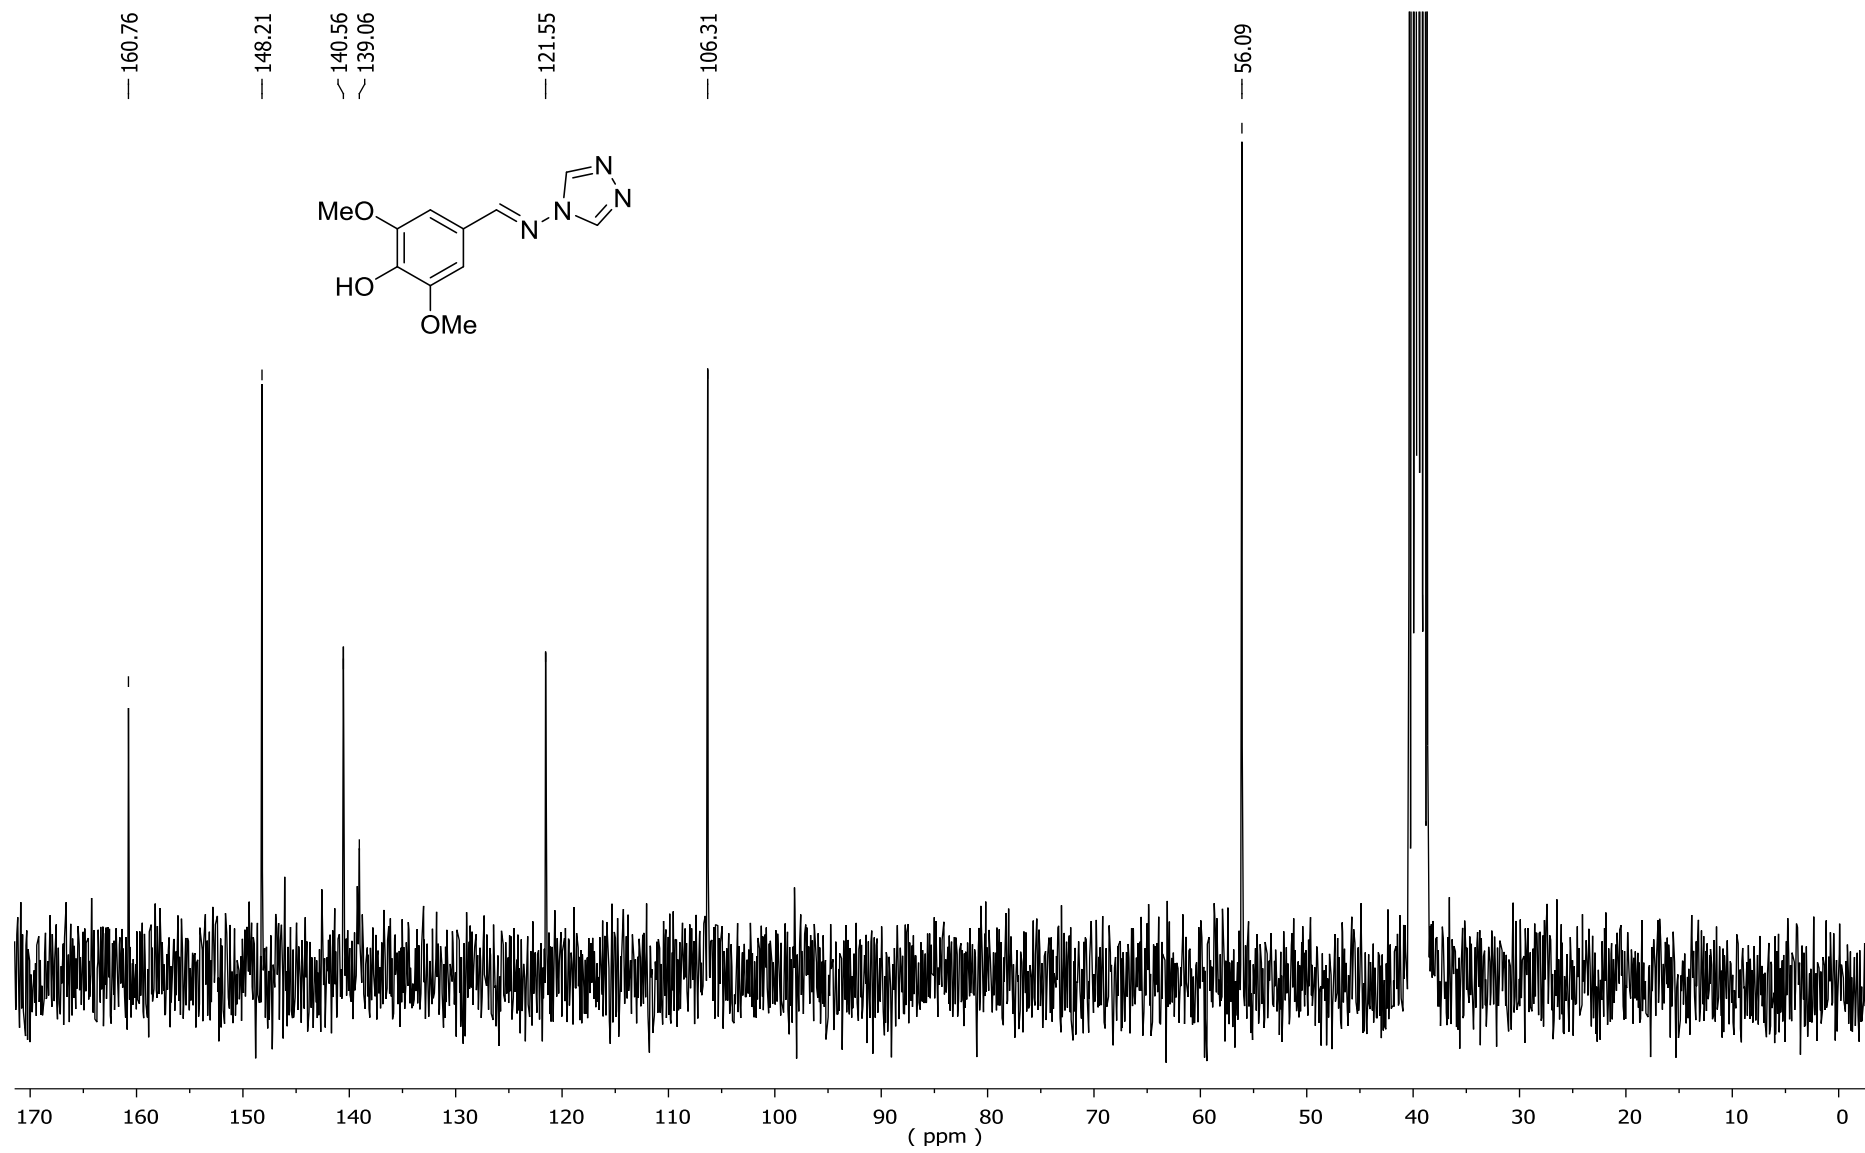

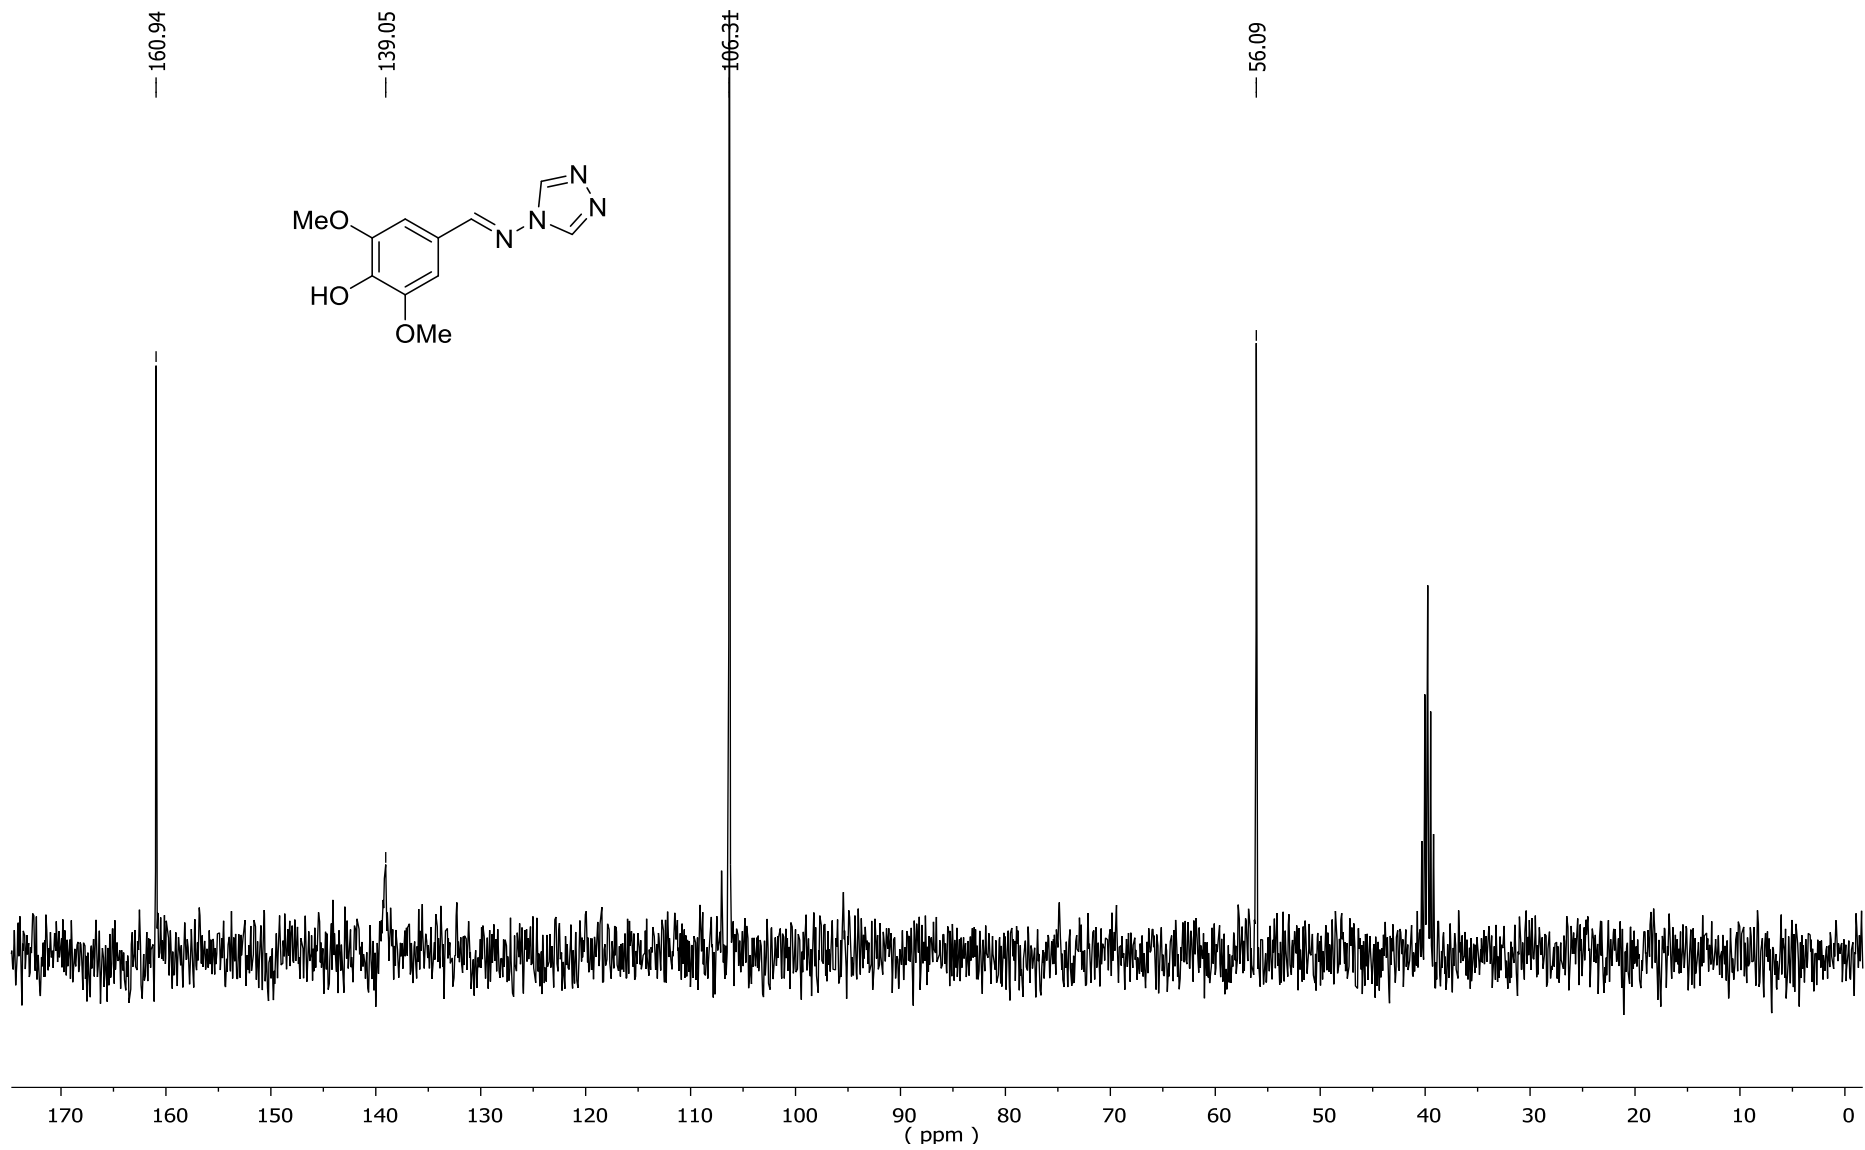

S55

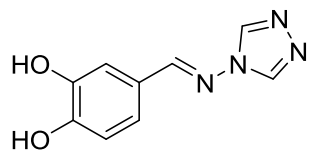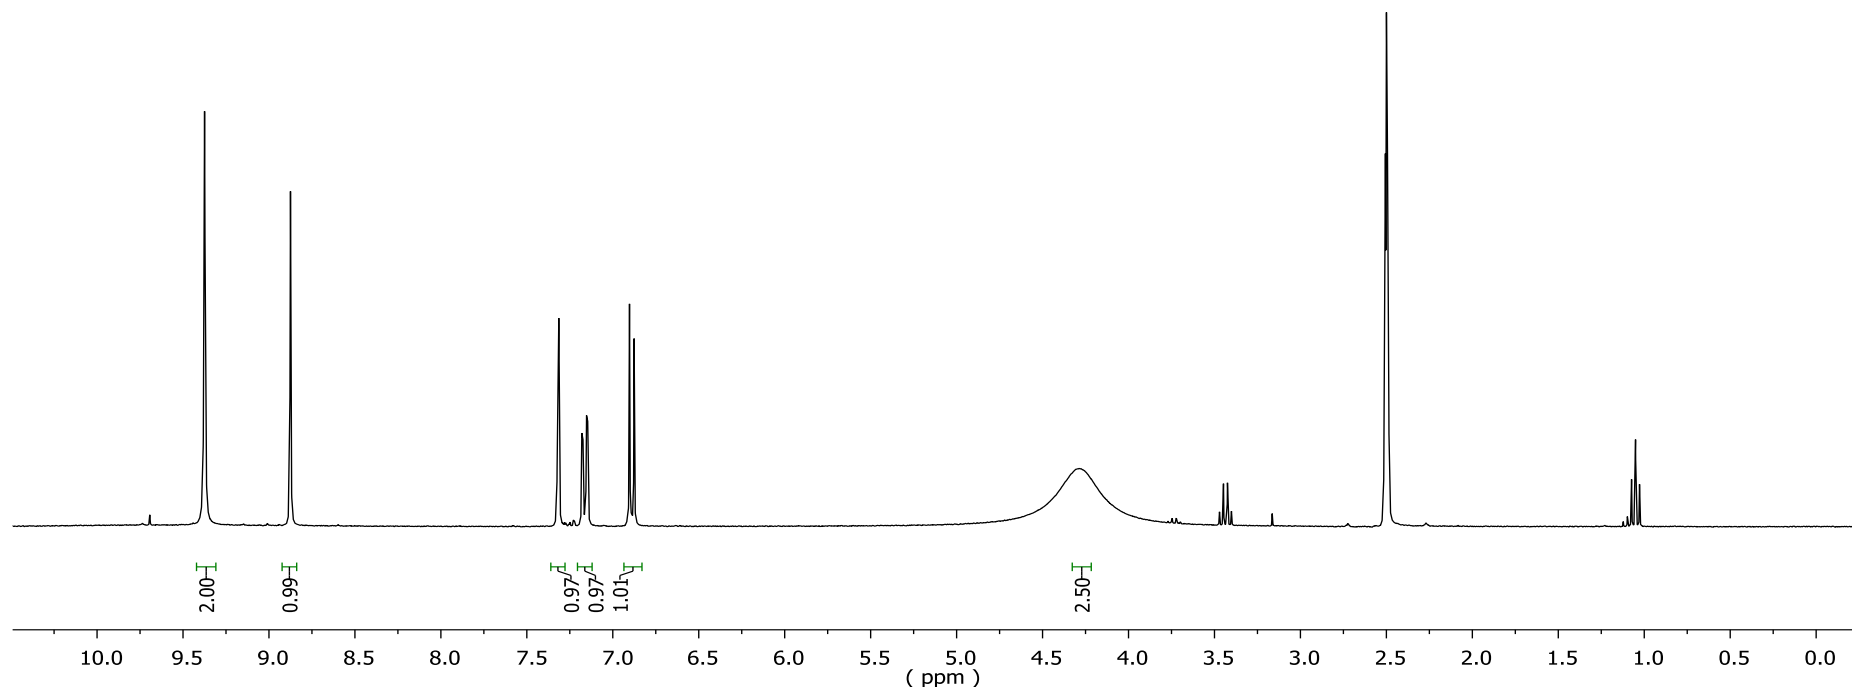

S56



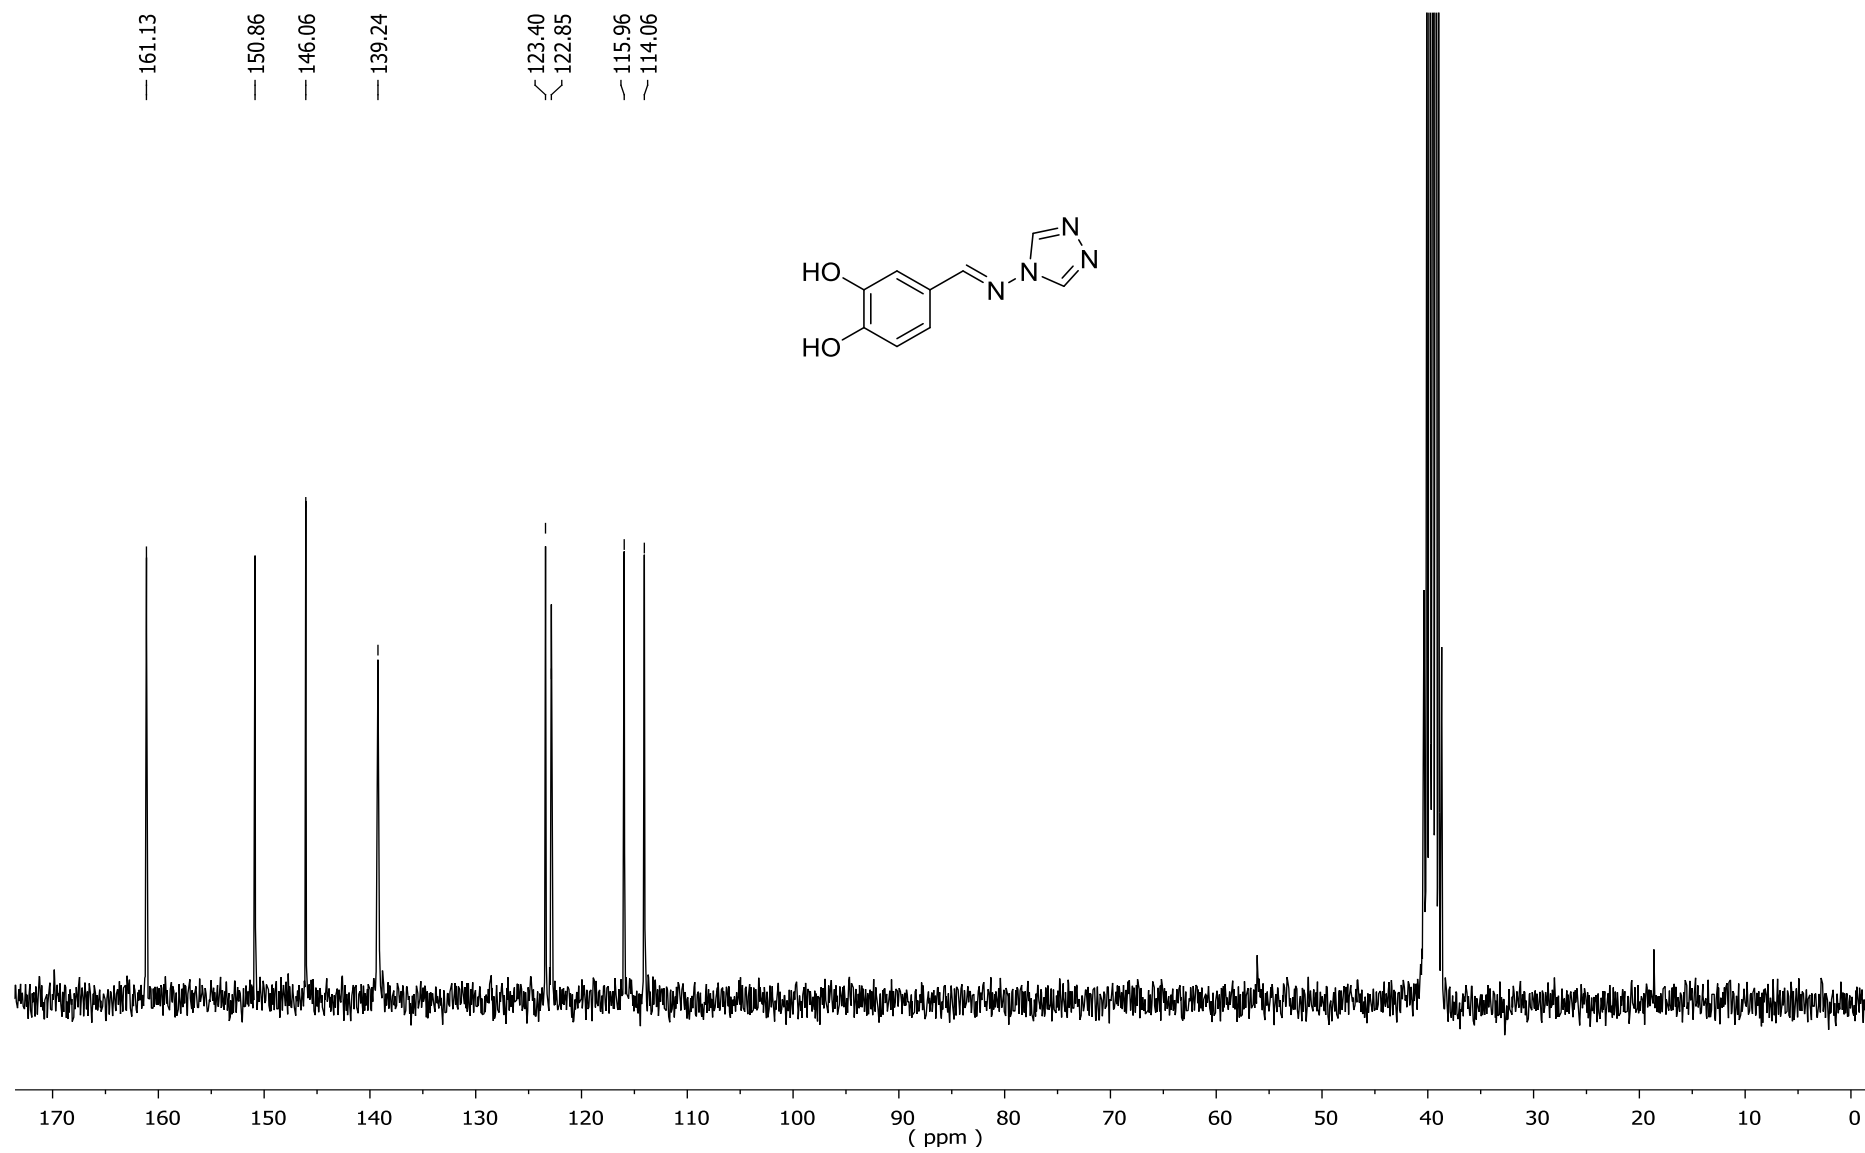

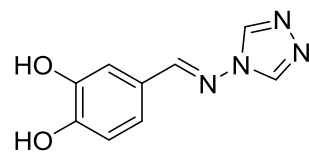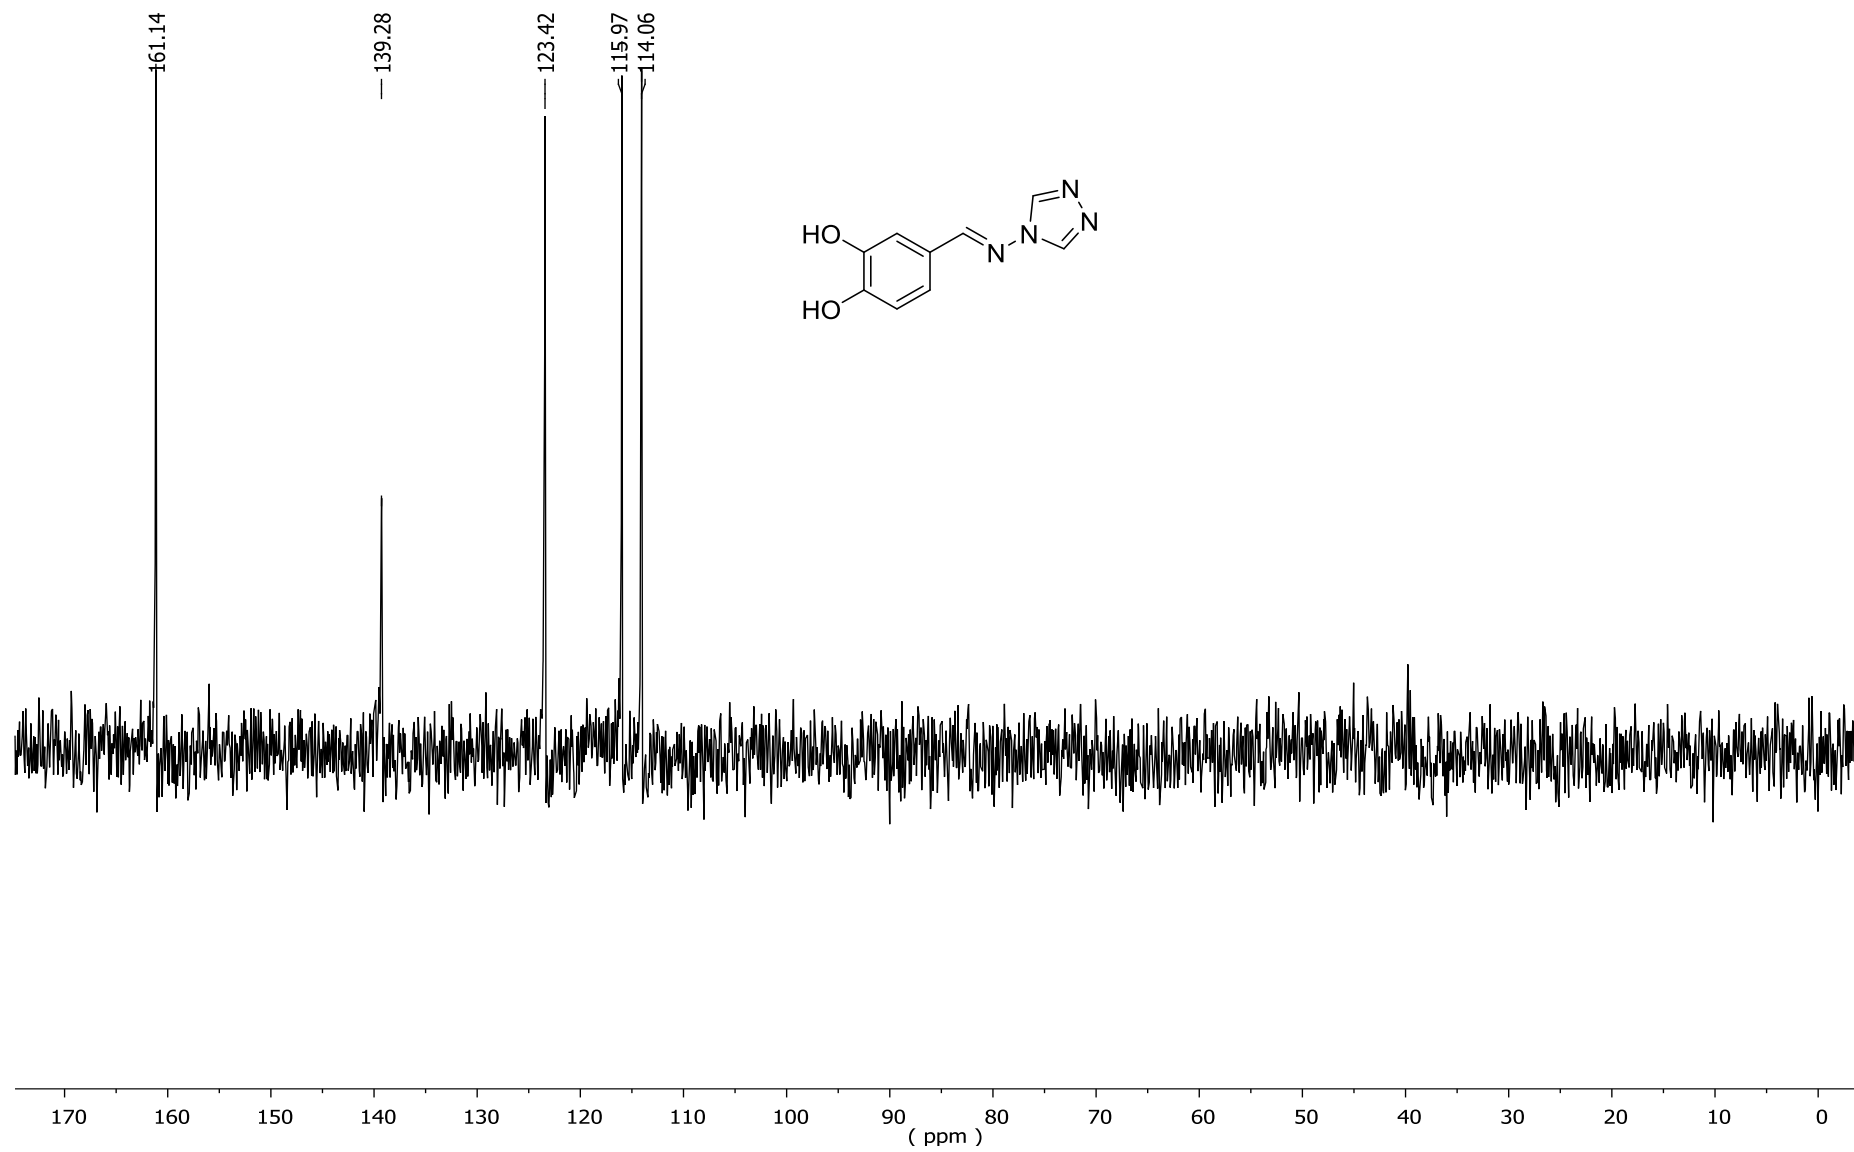

S58

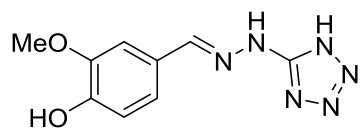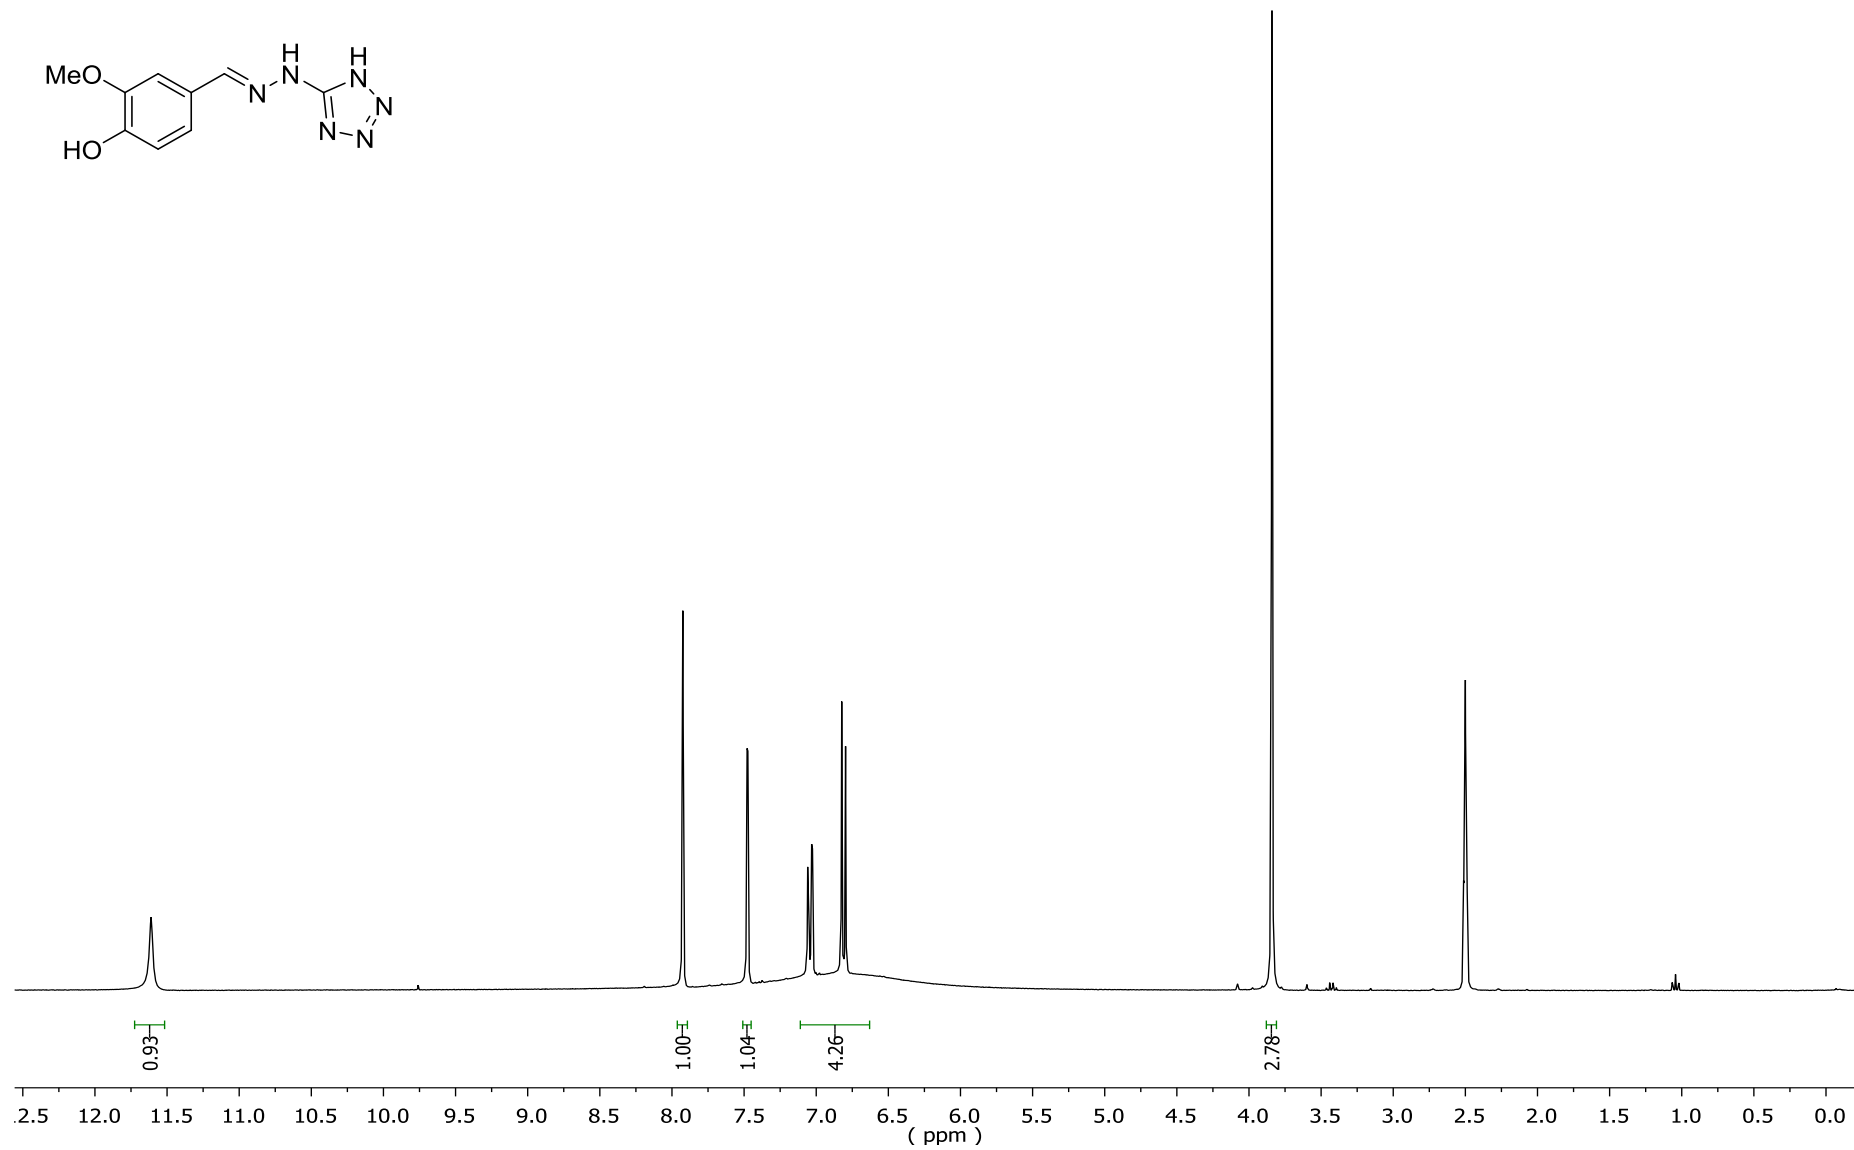

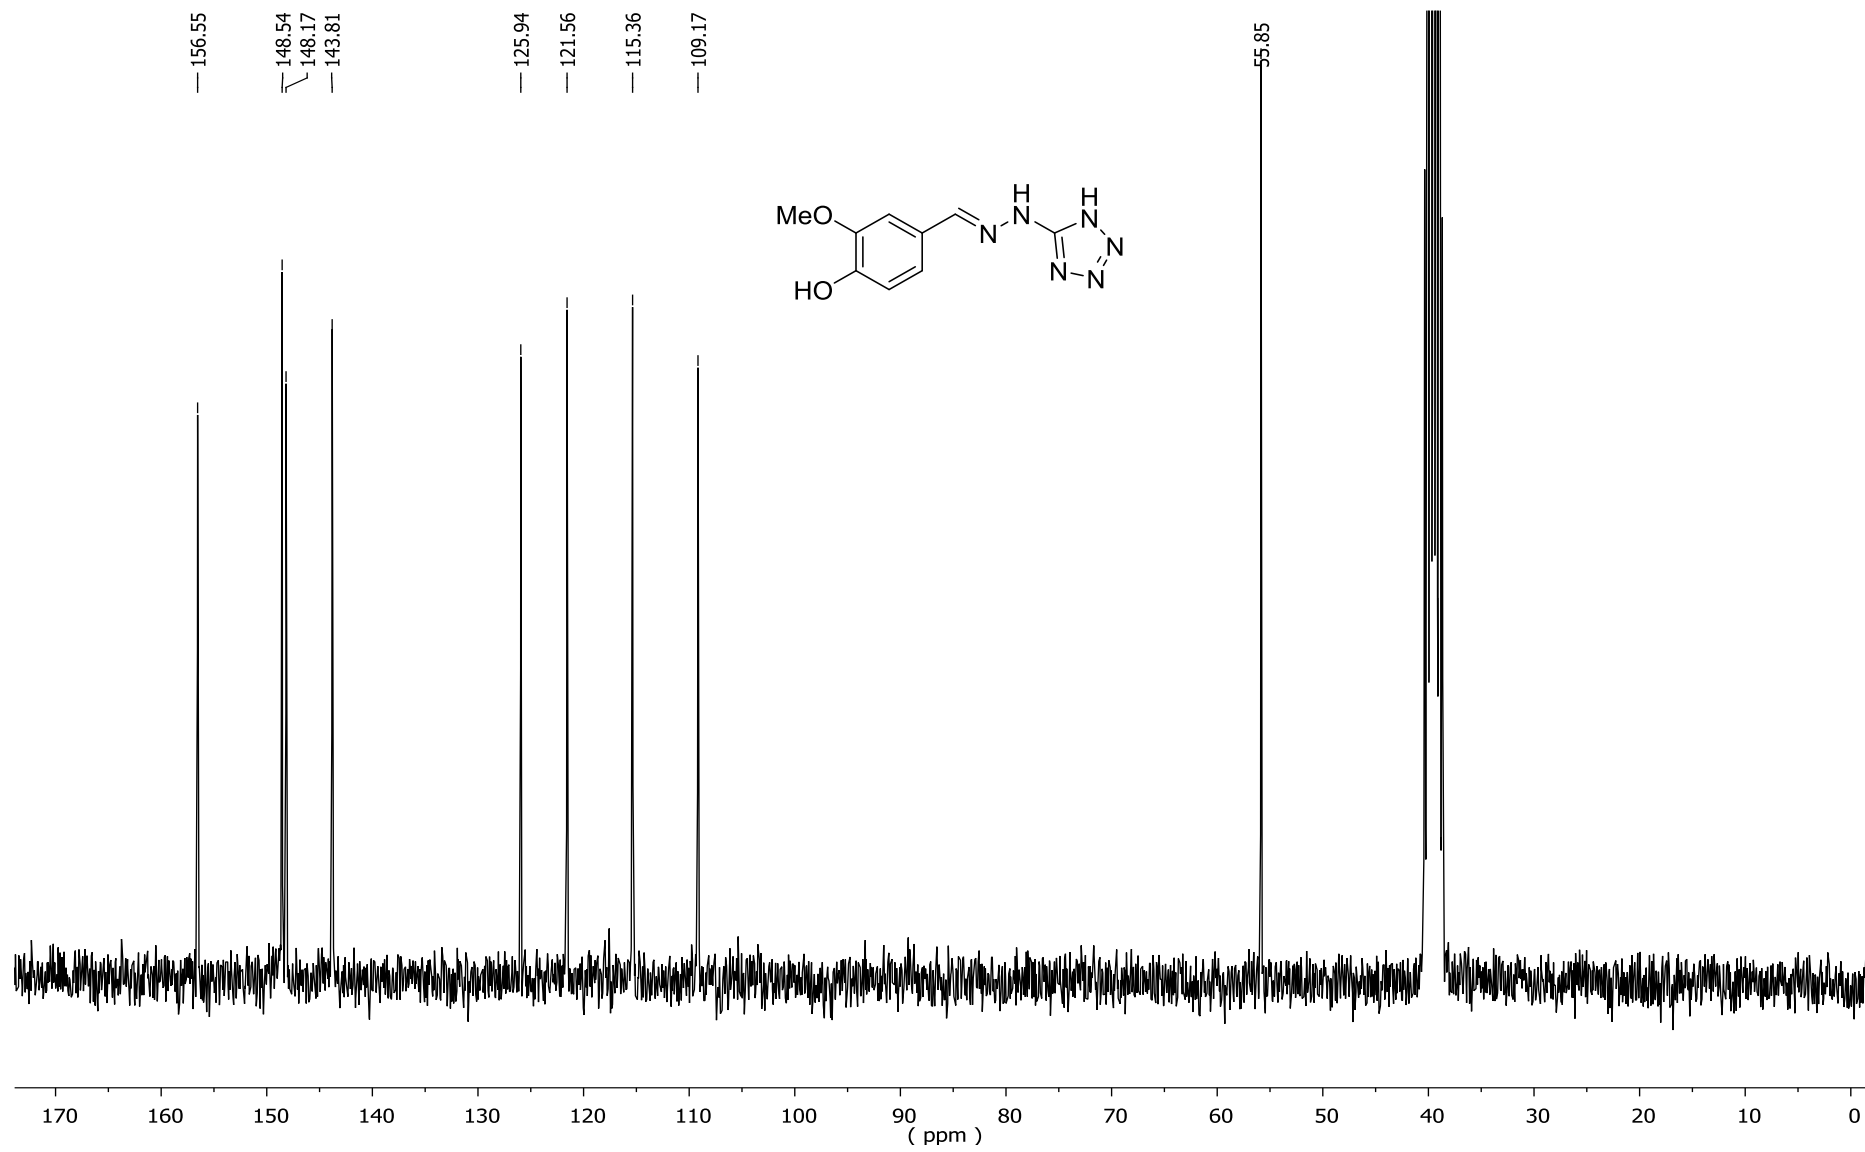

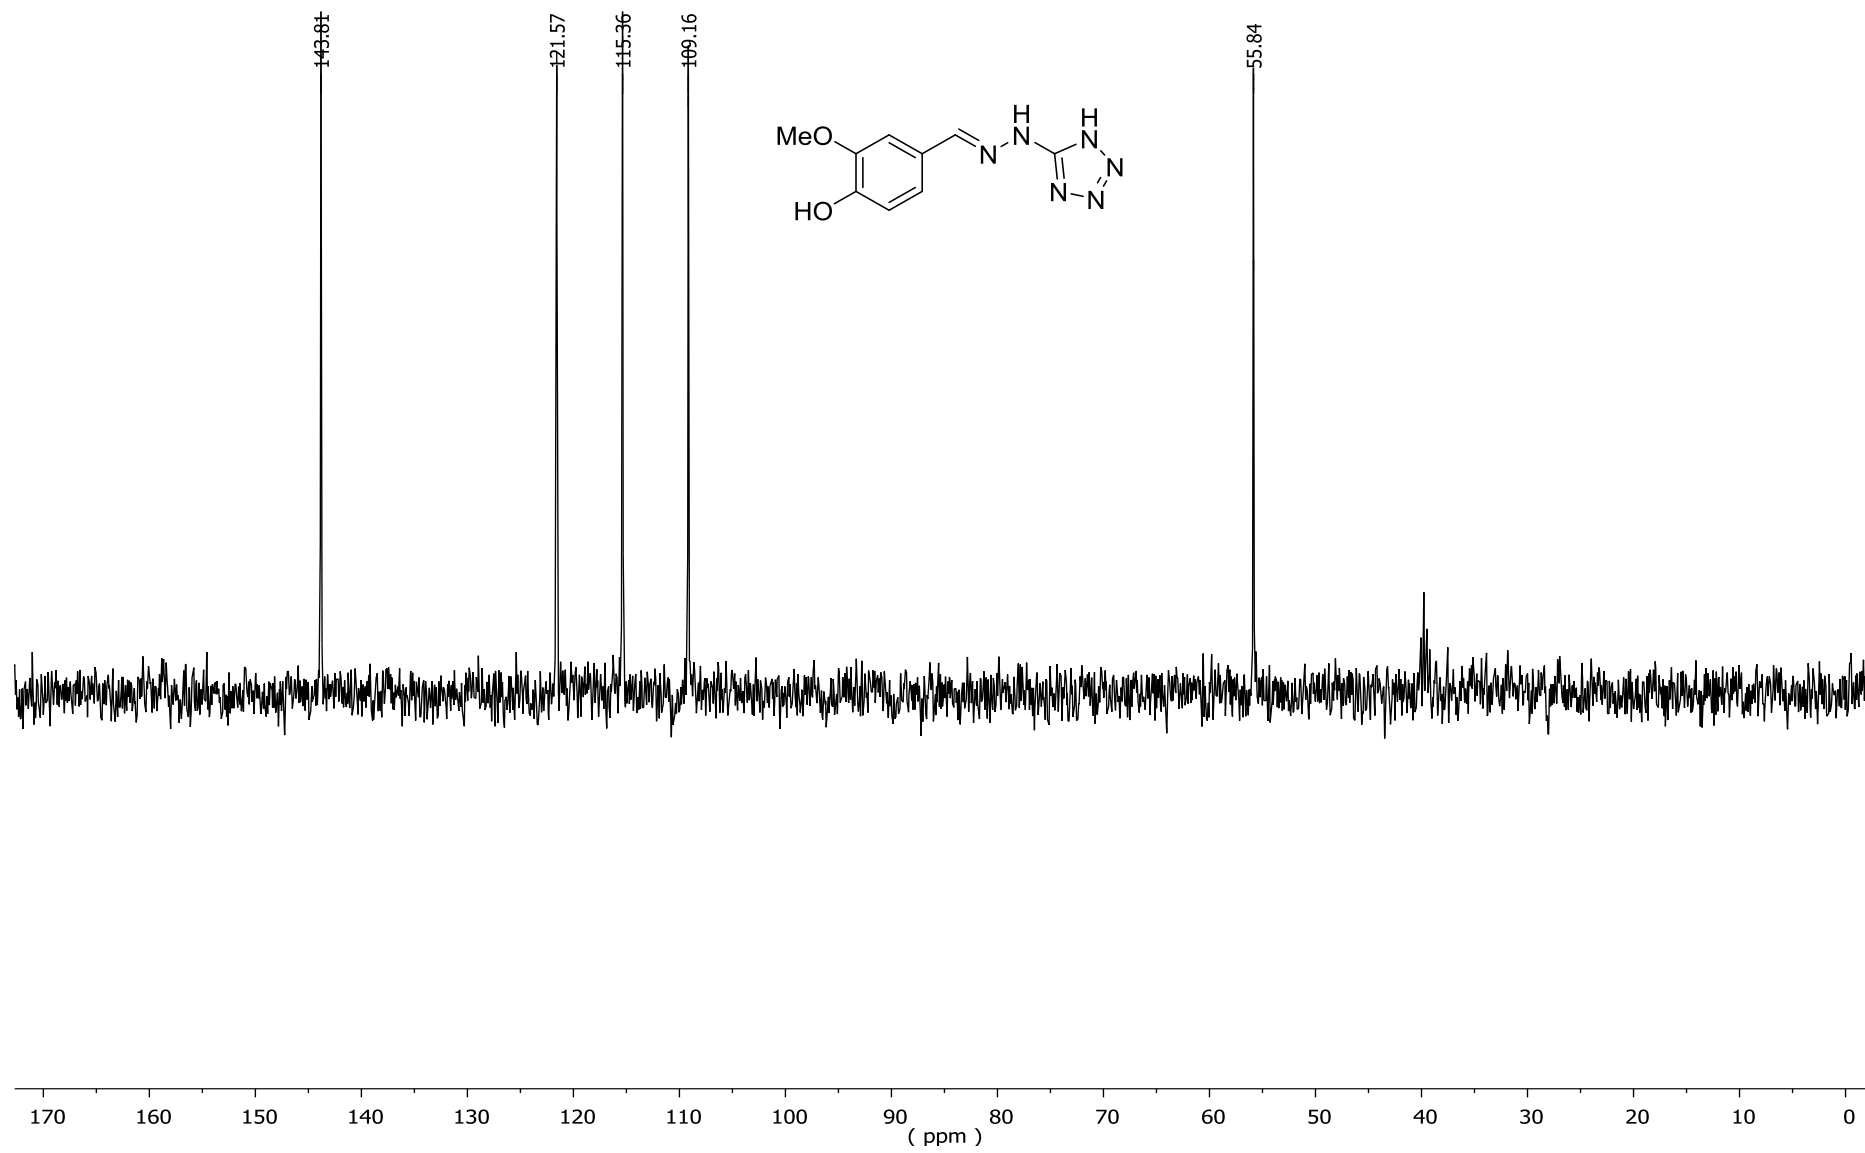

S61

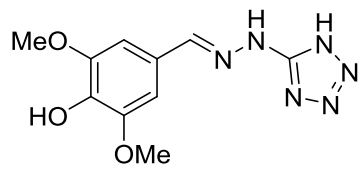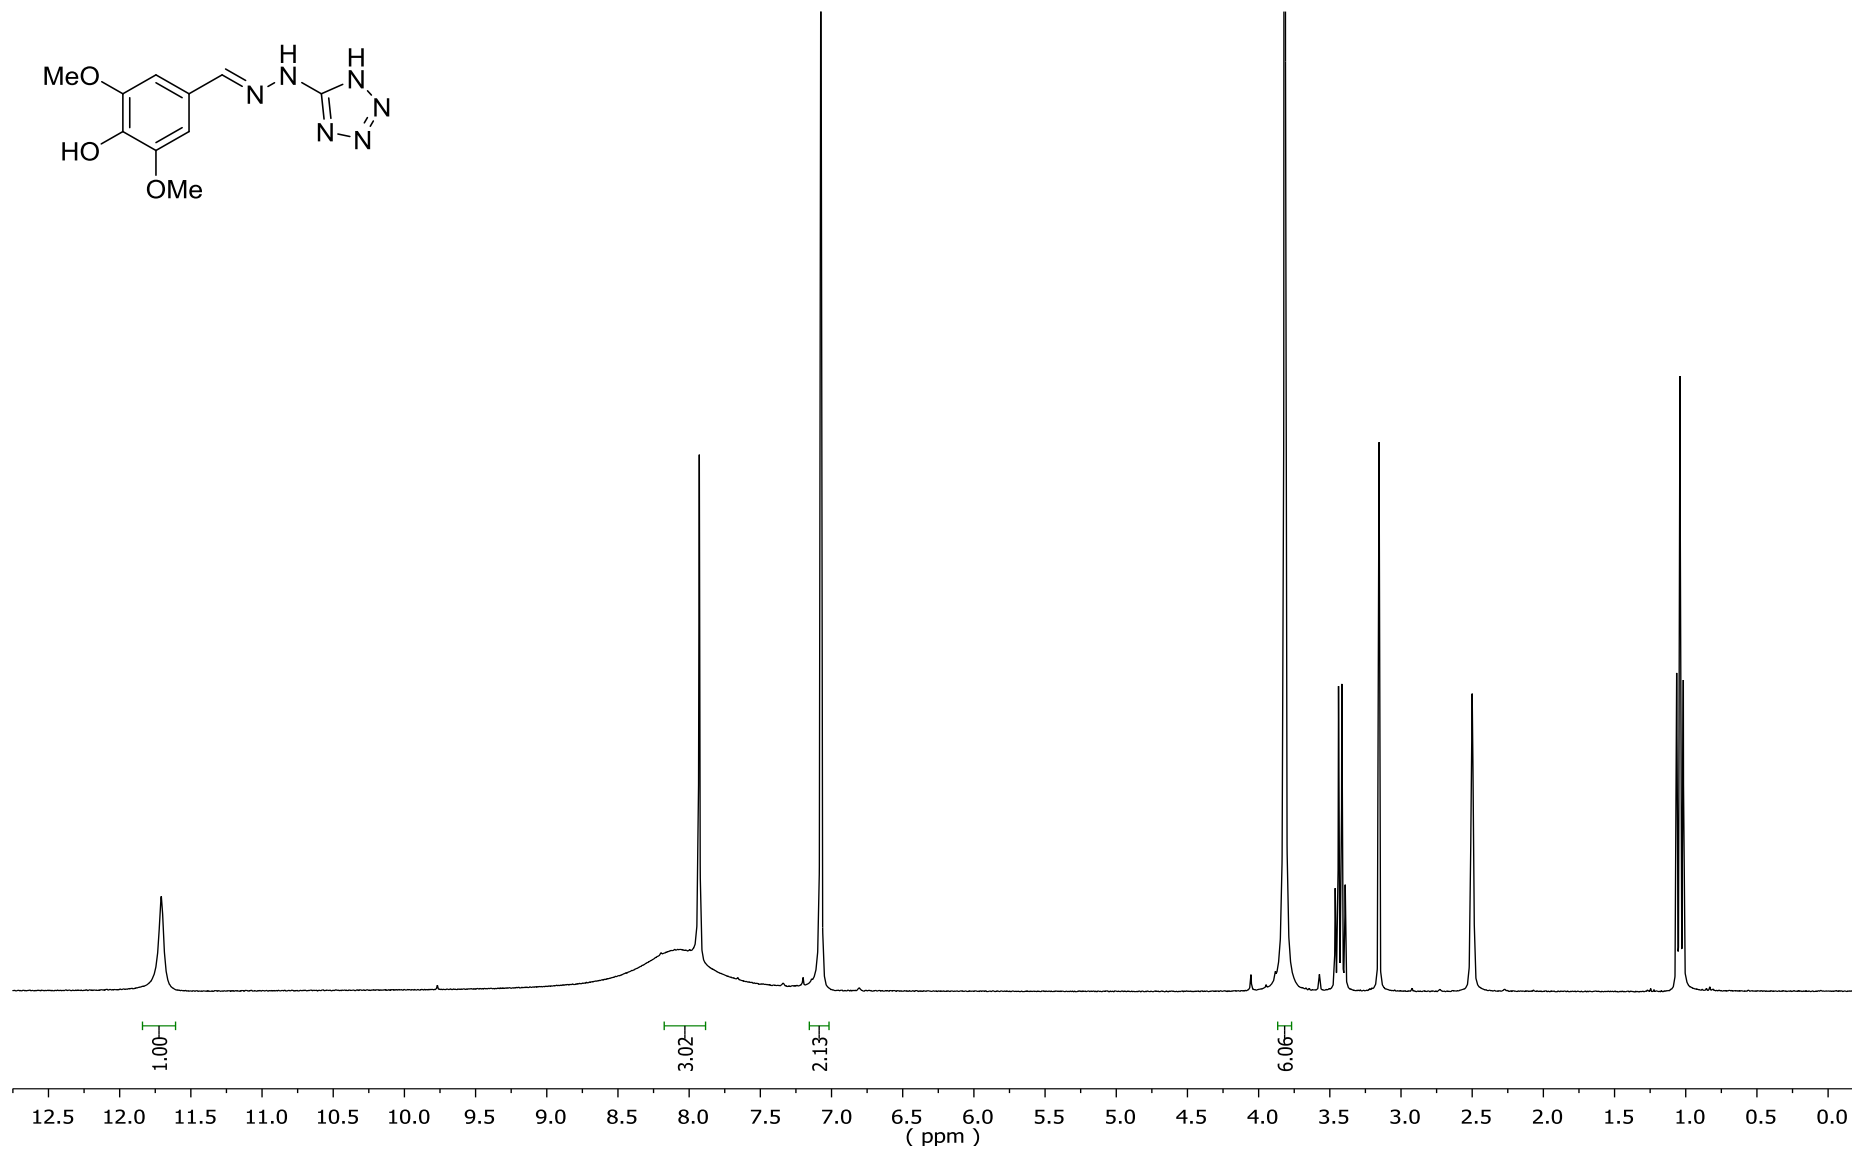

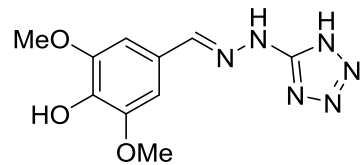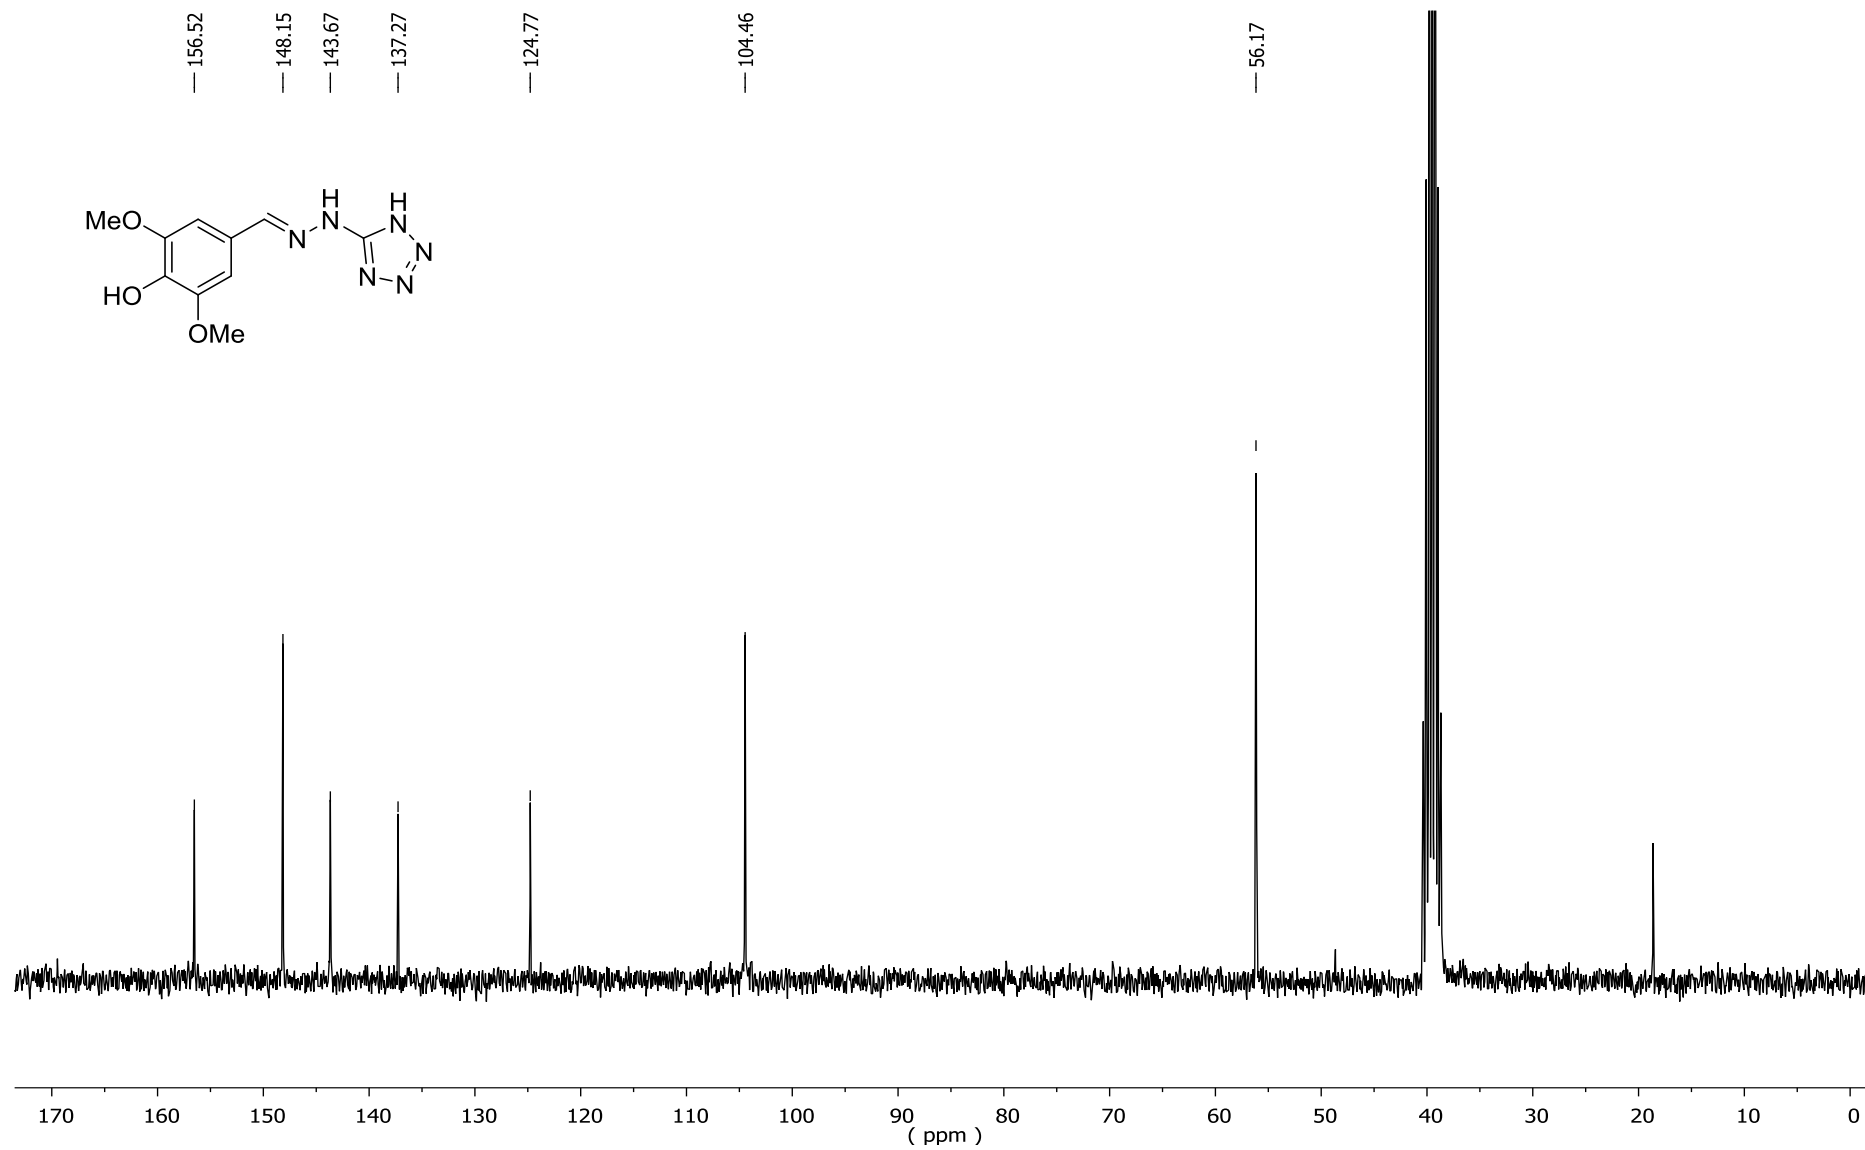

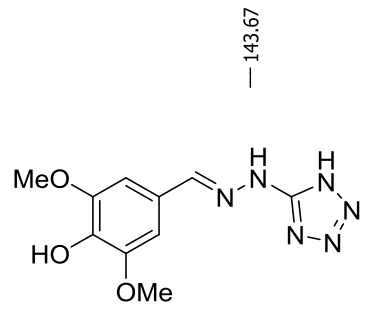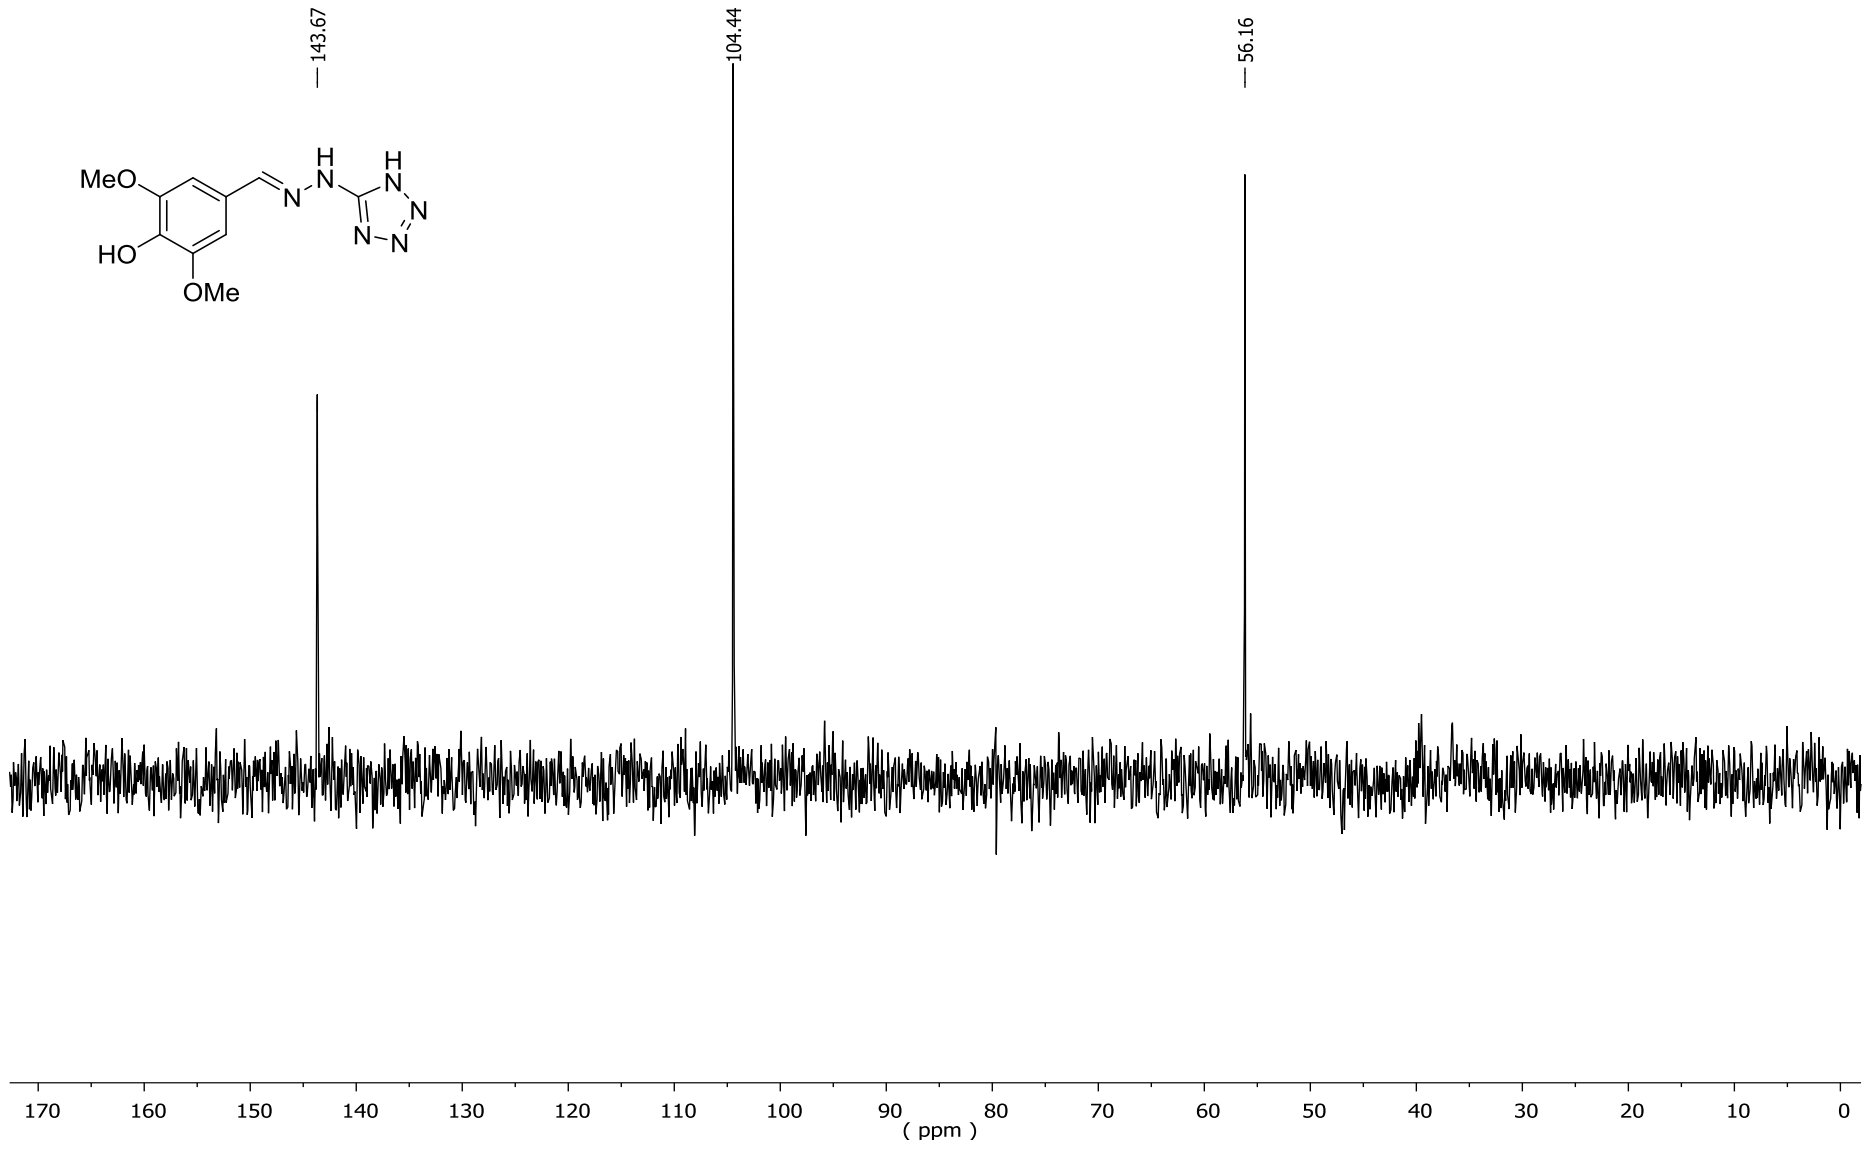



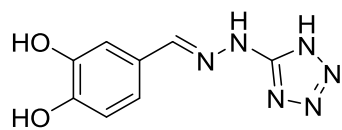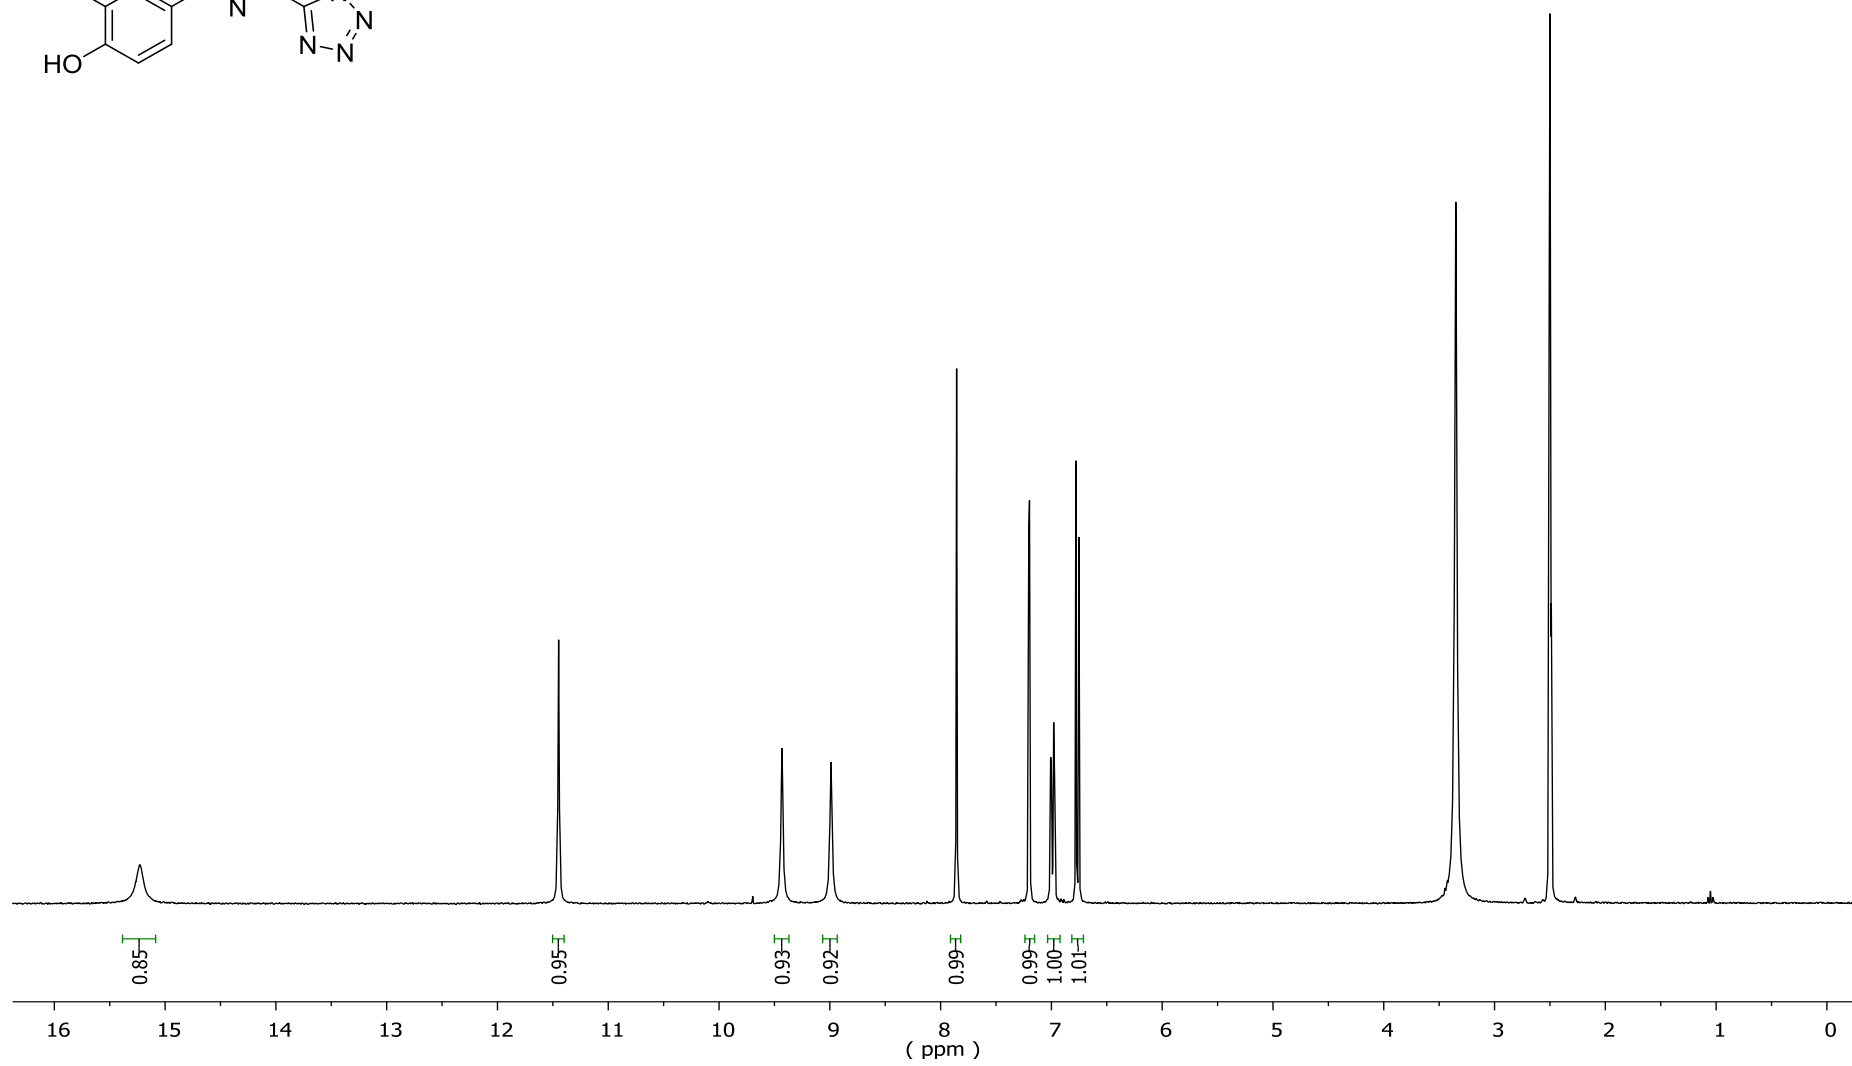

S65

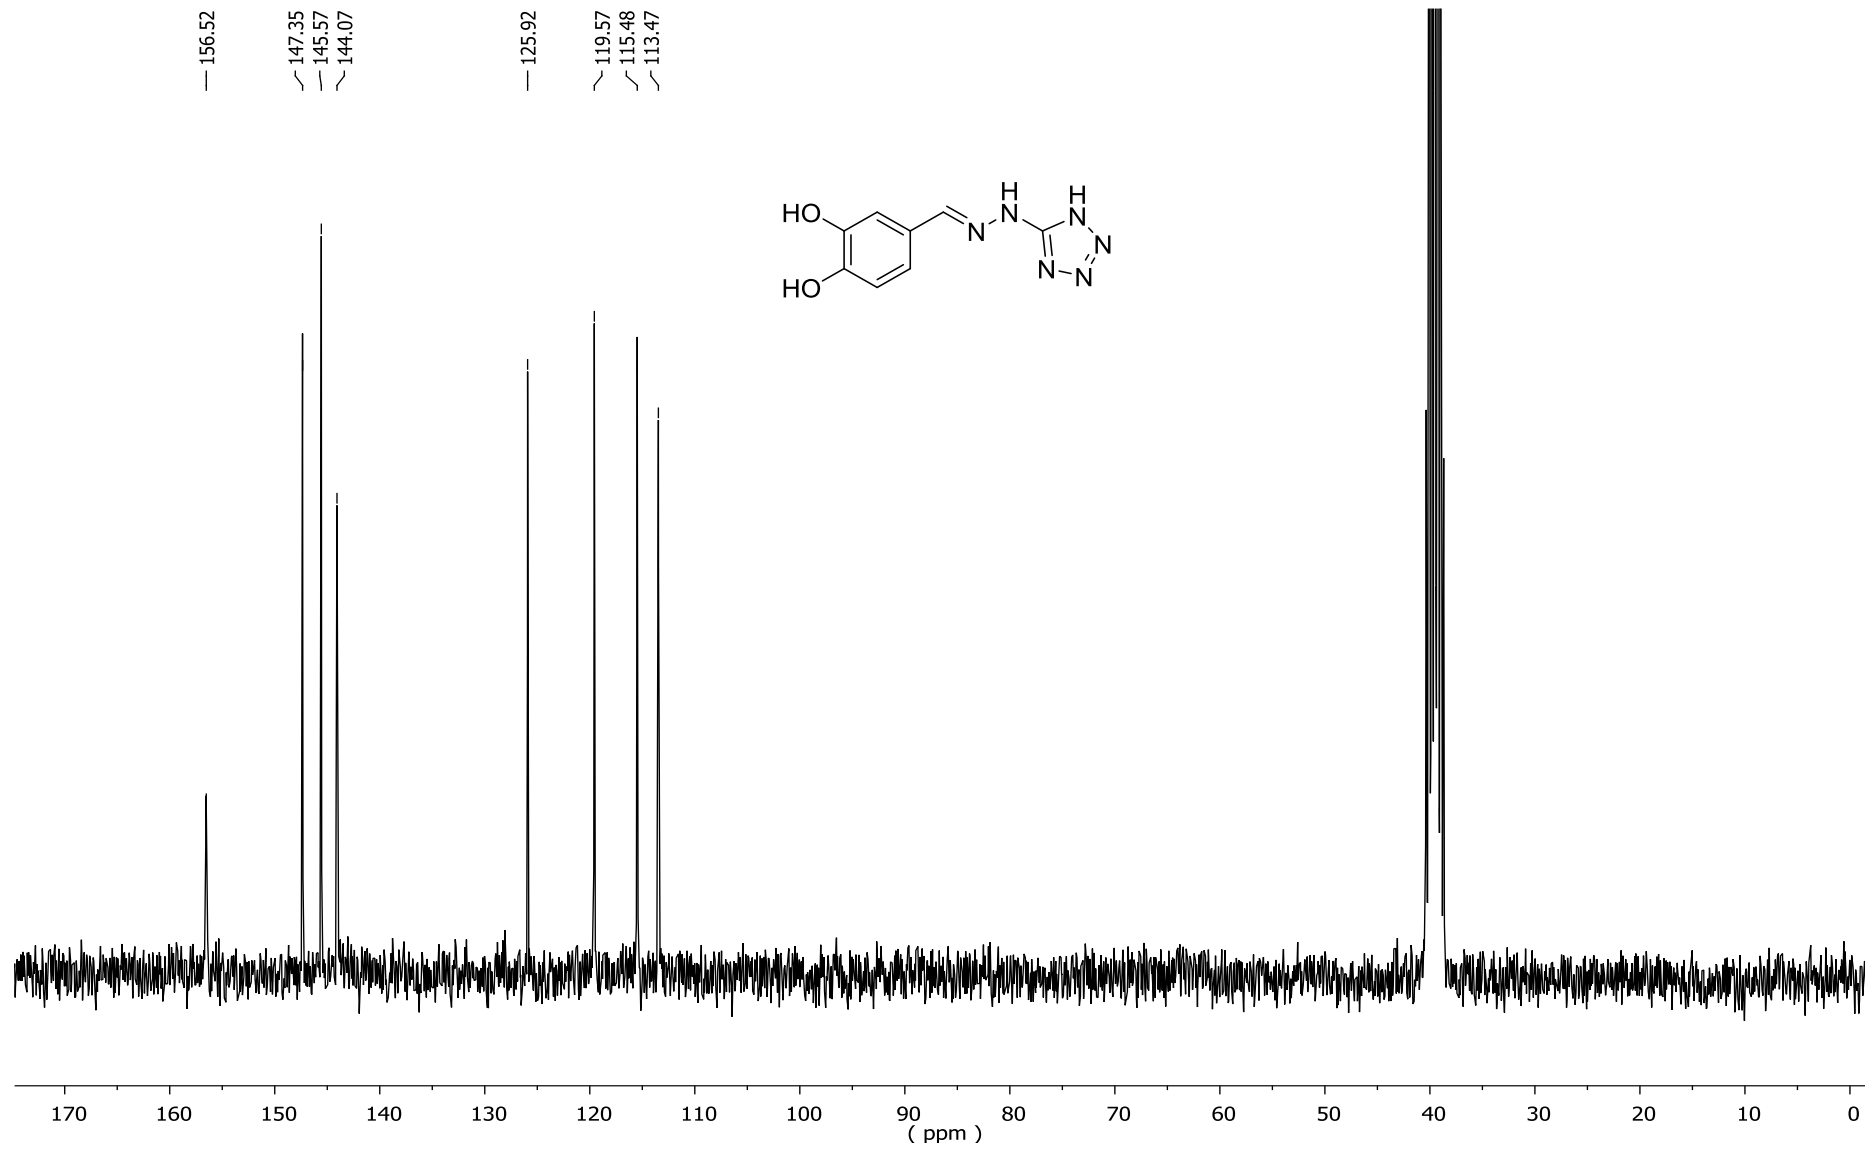

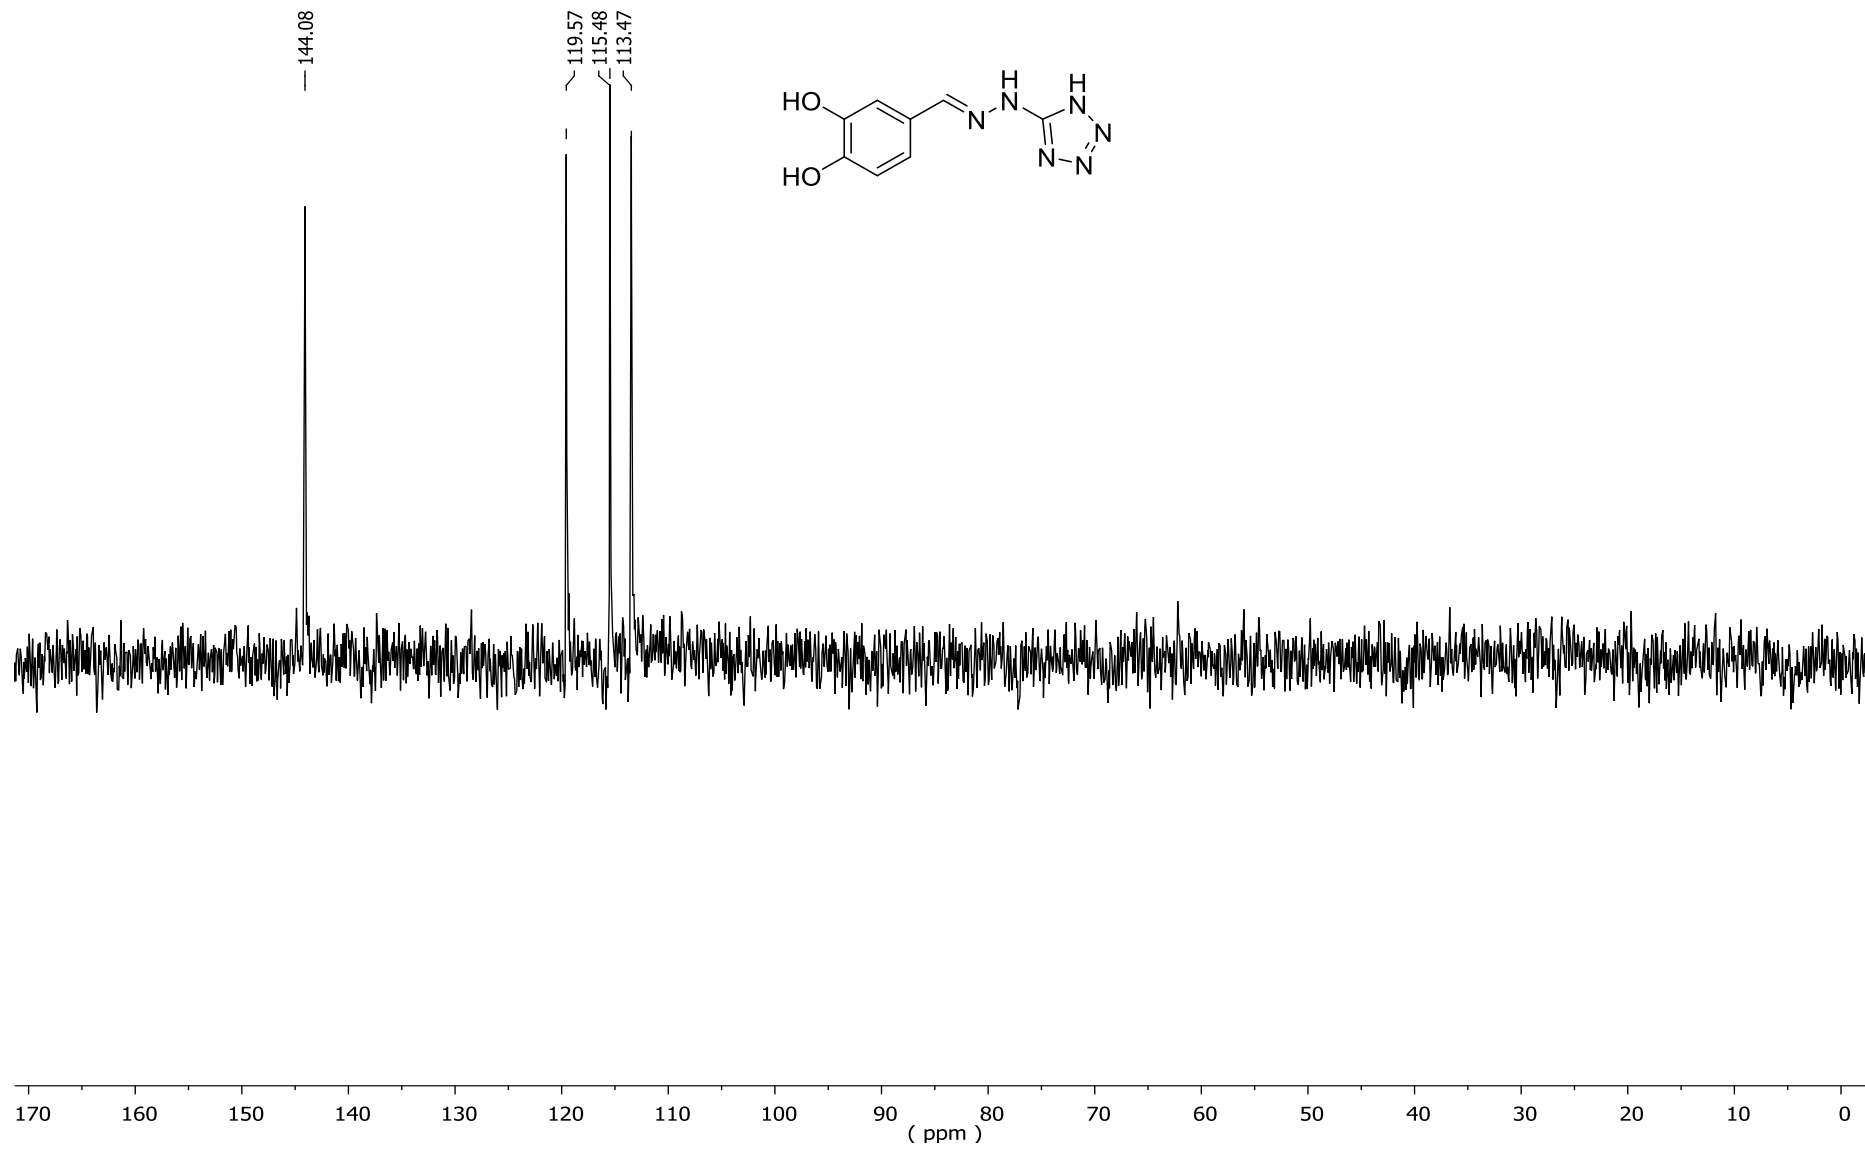

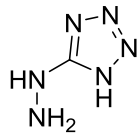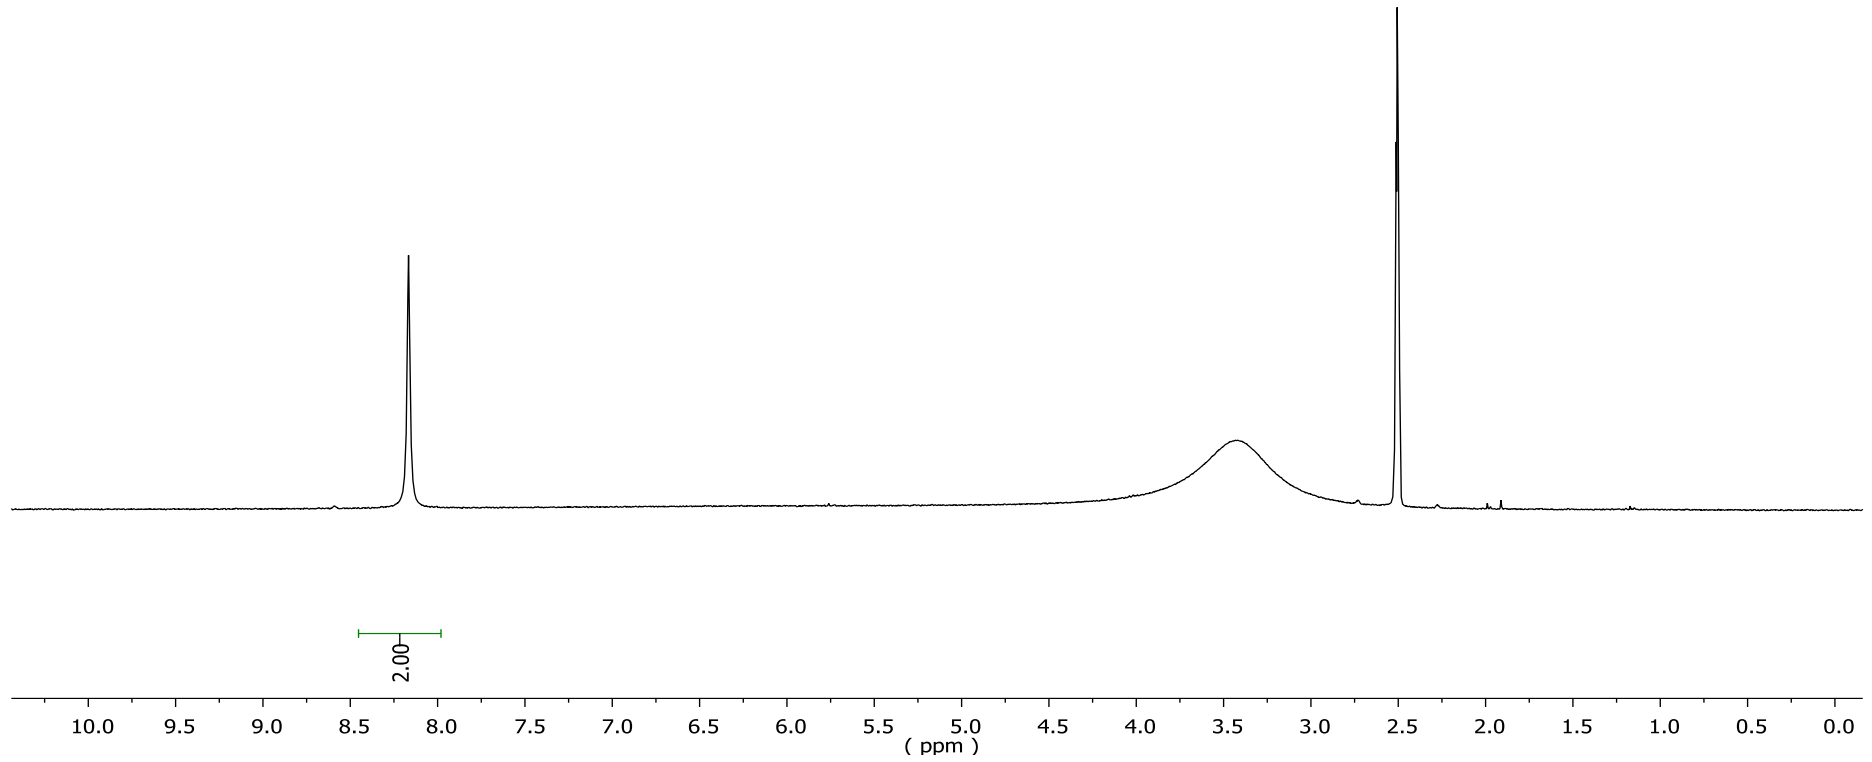

S68

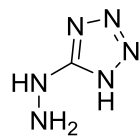

— 161.36

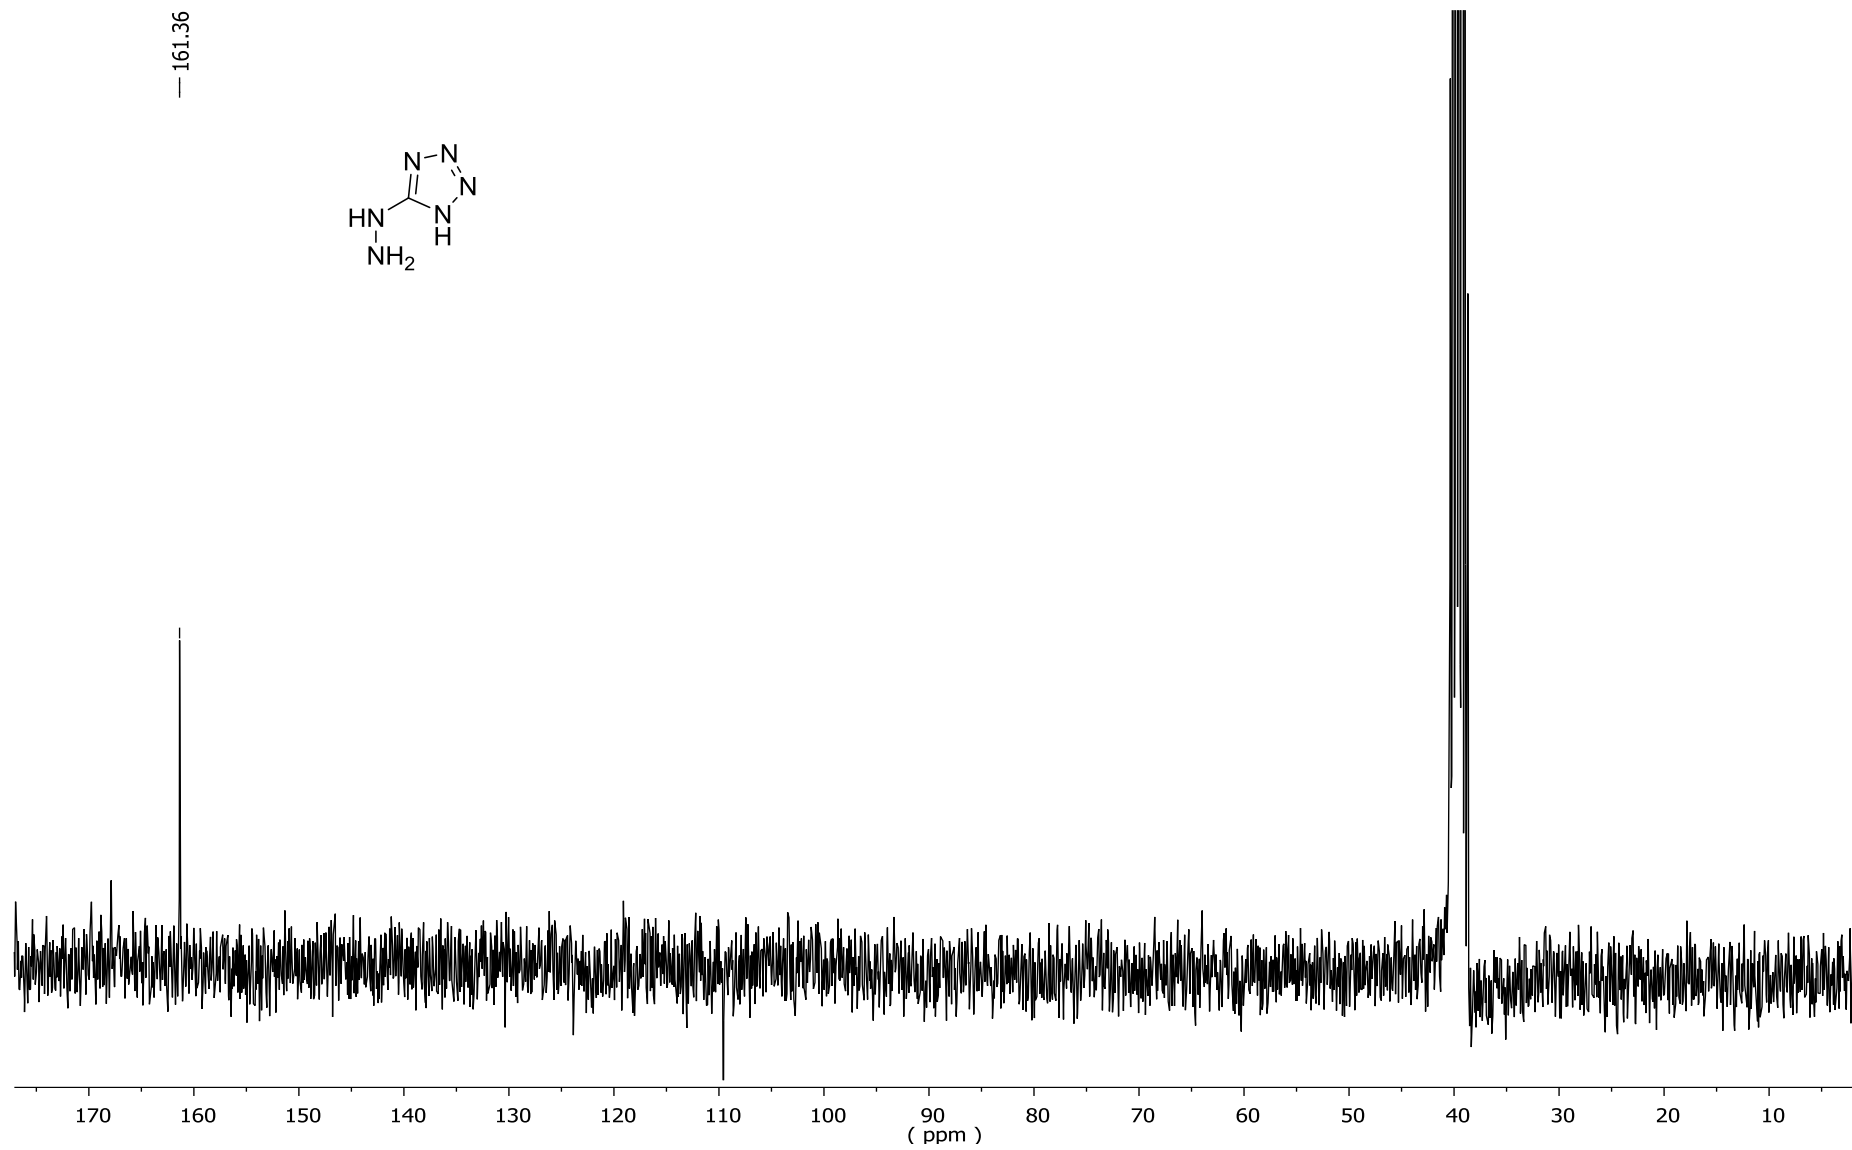

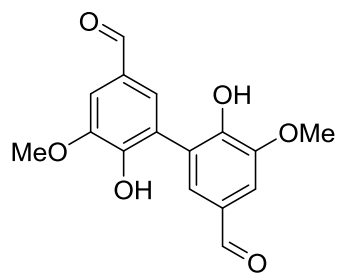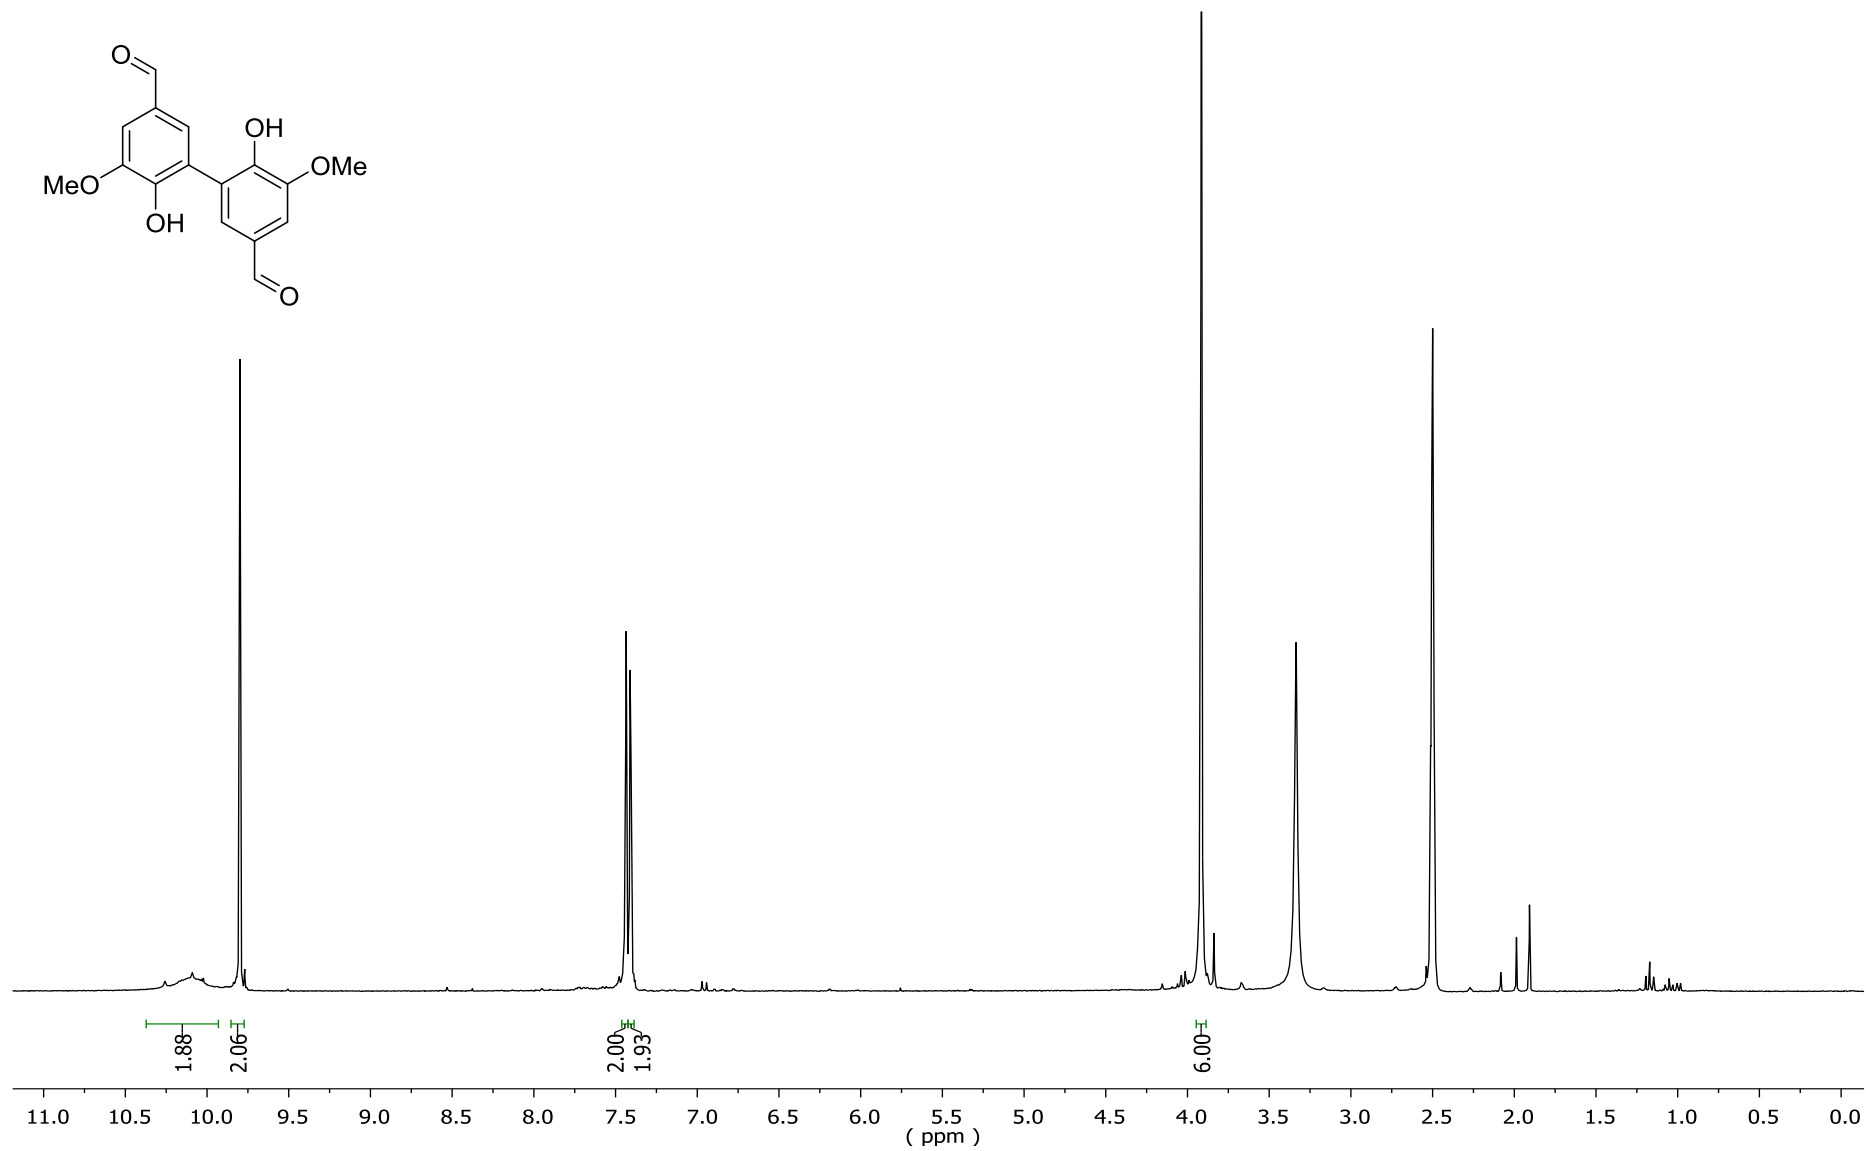

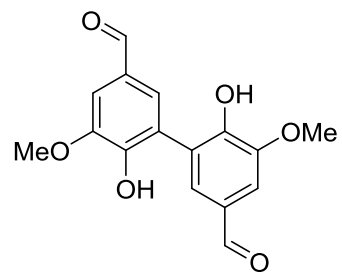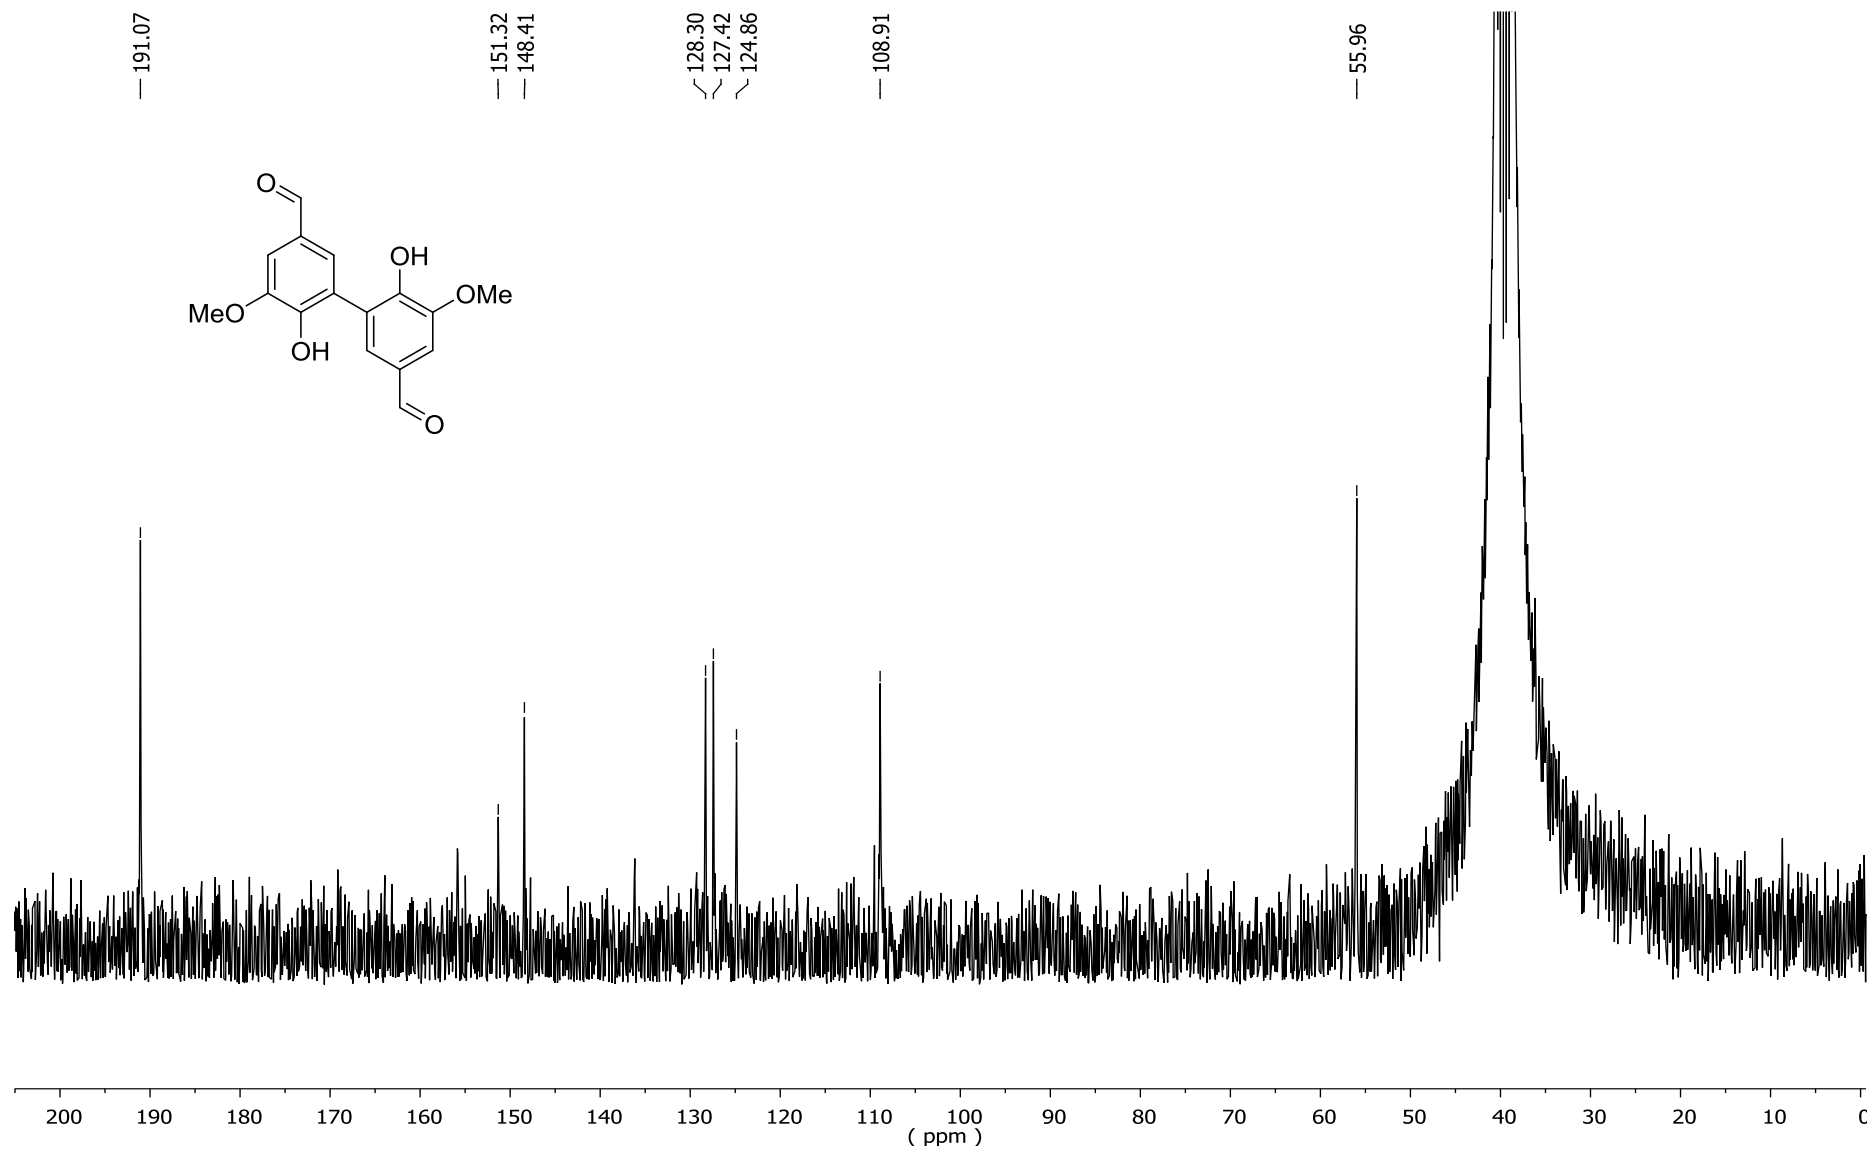

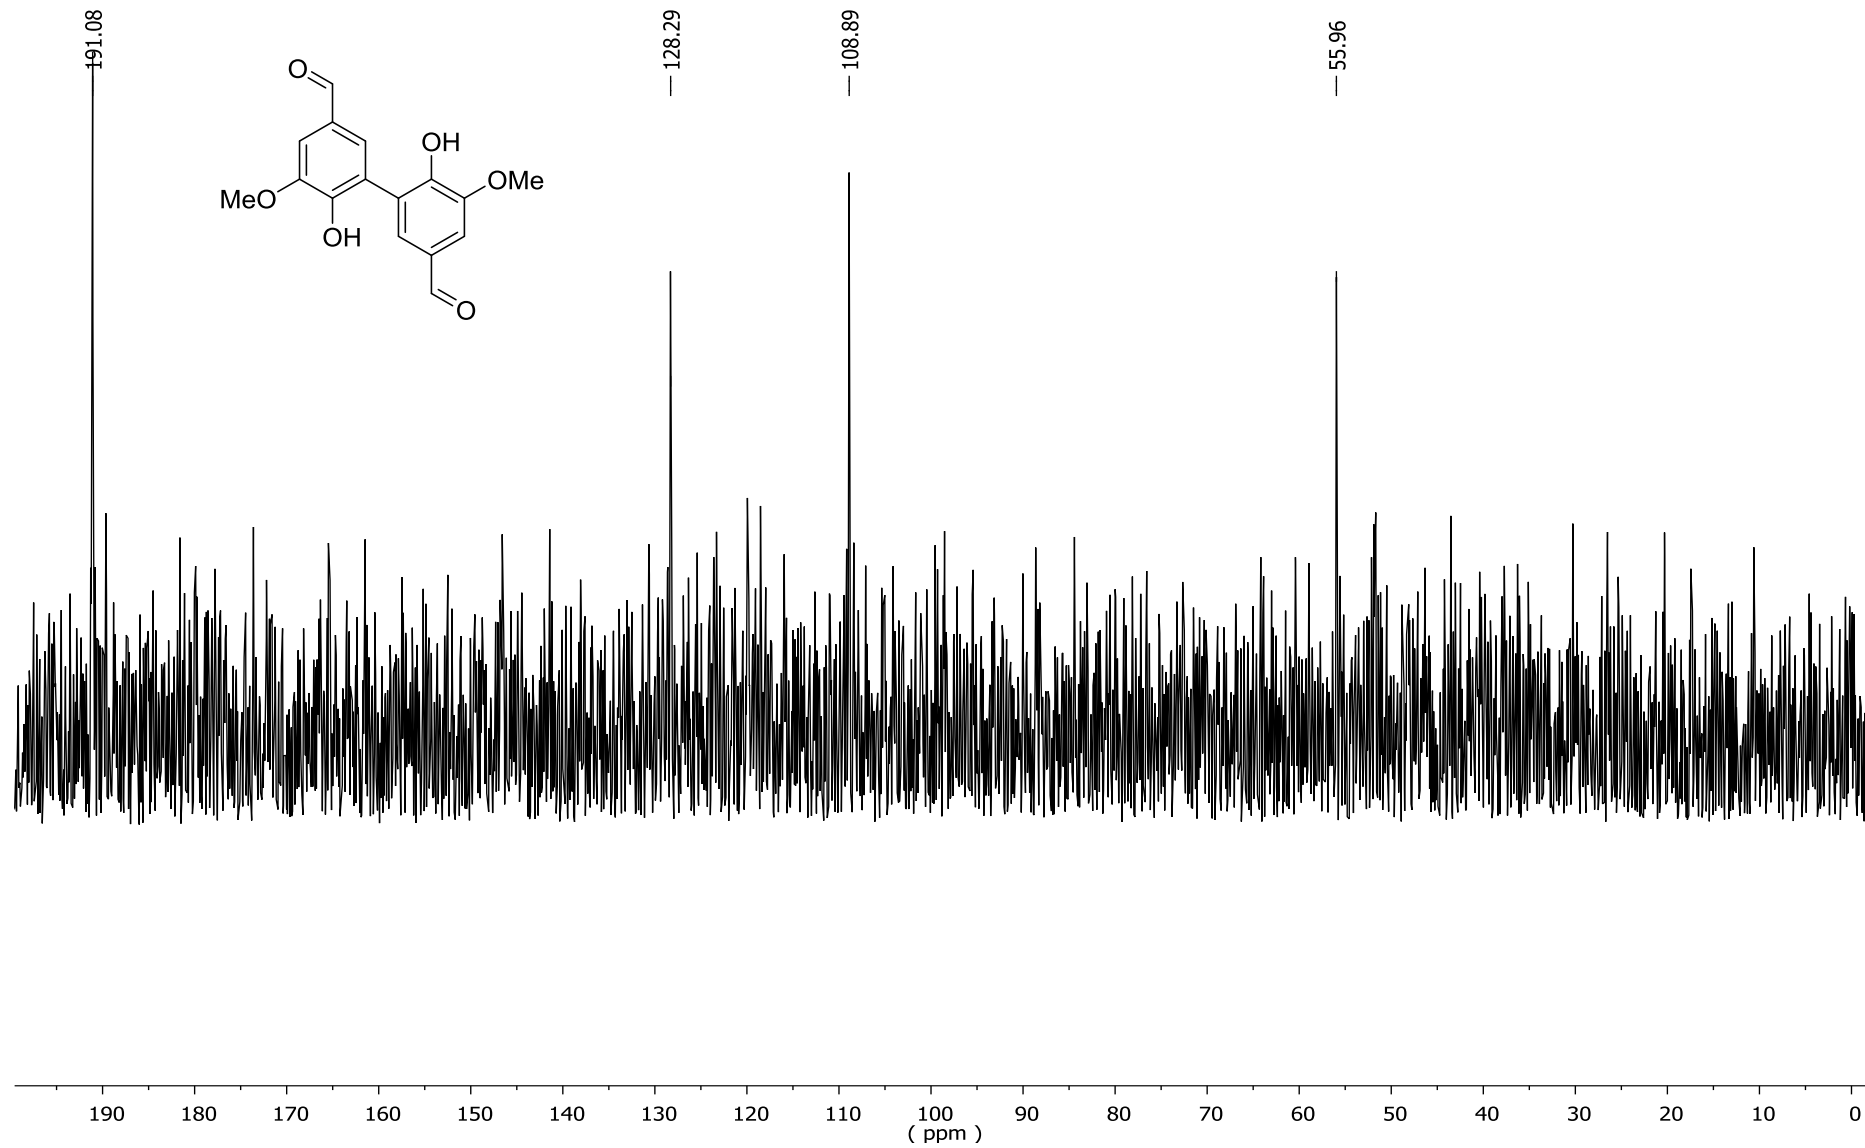



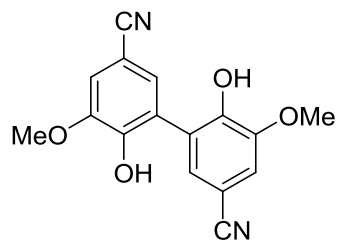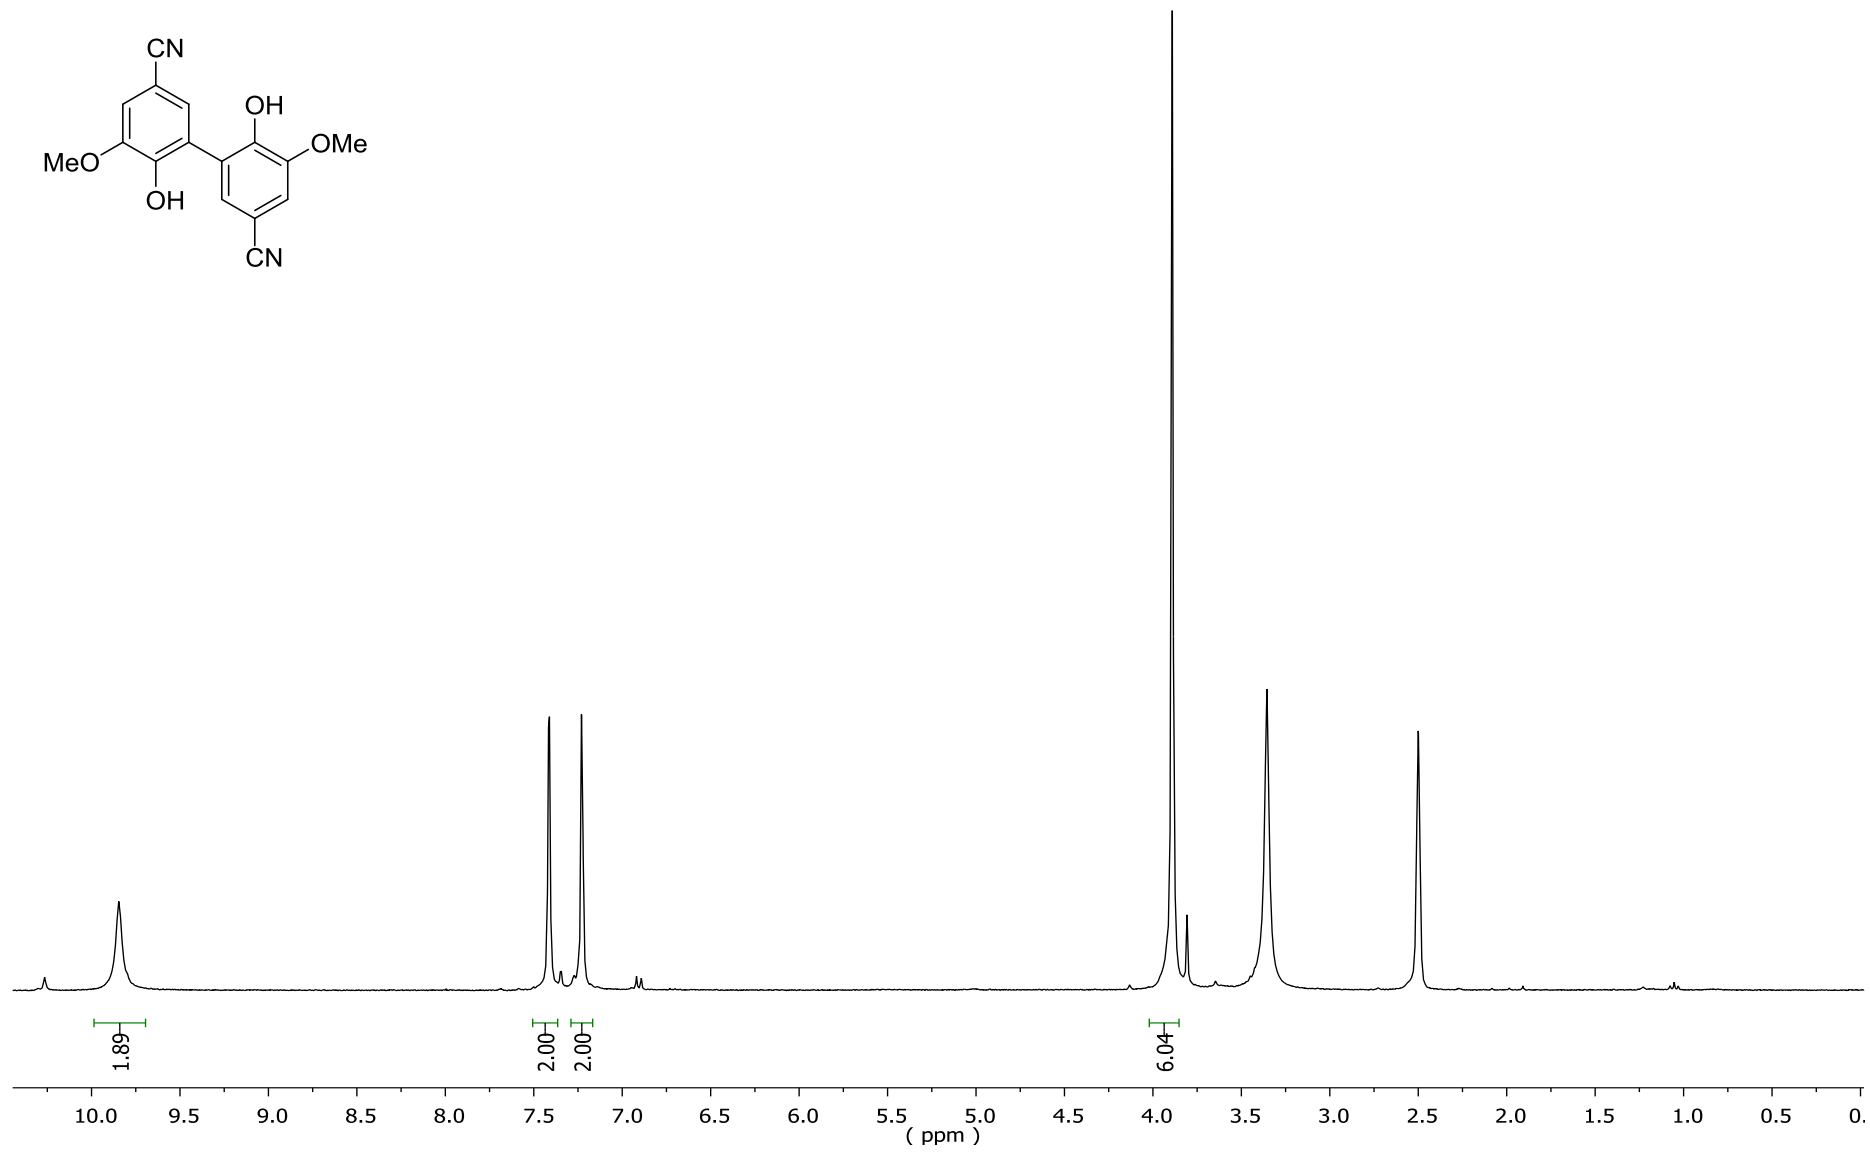

S73

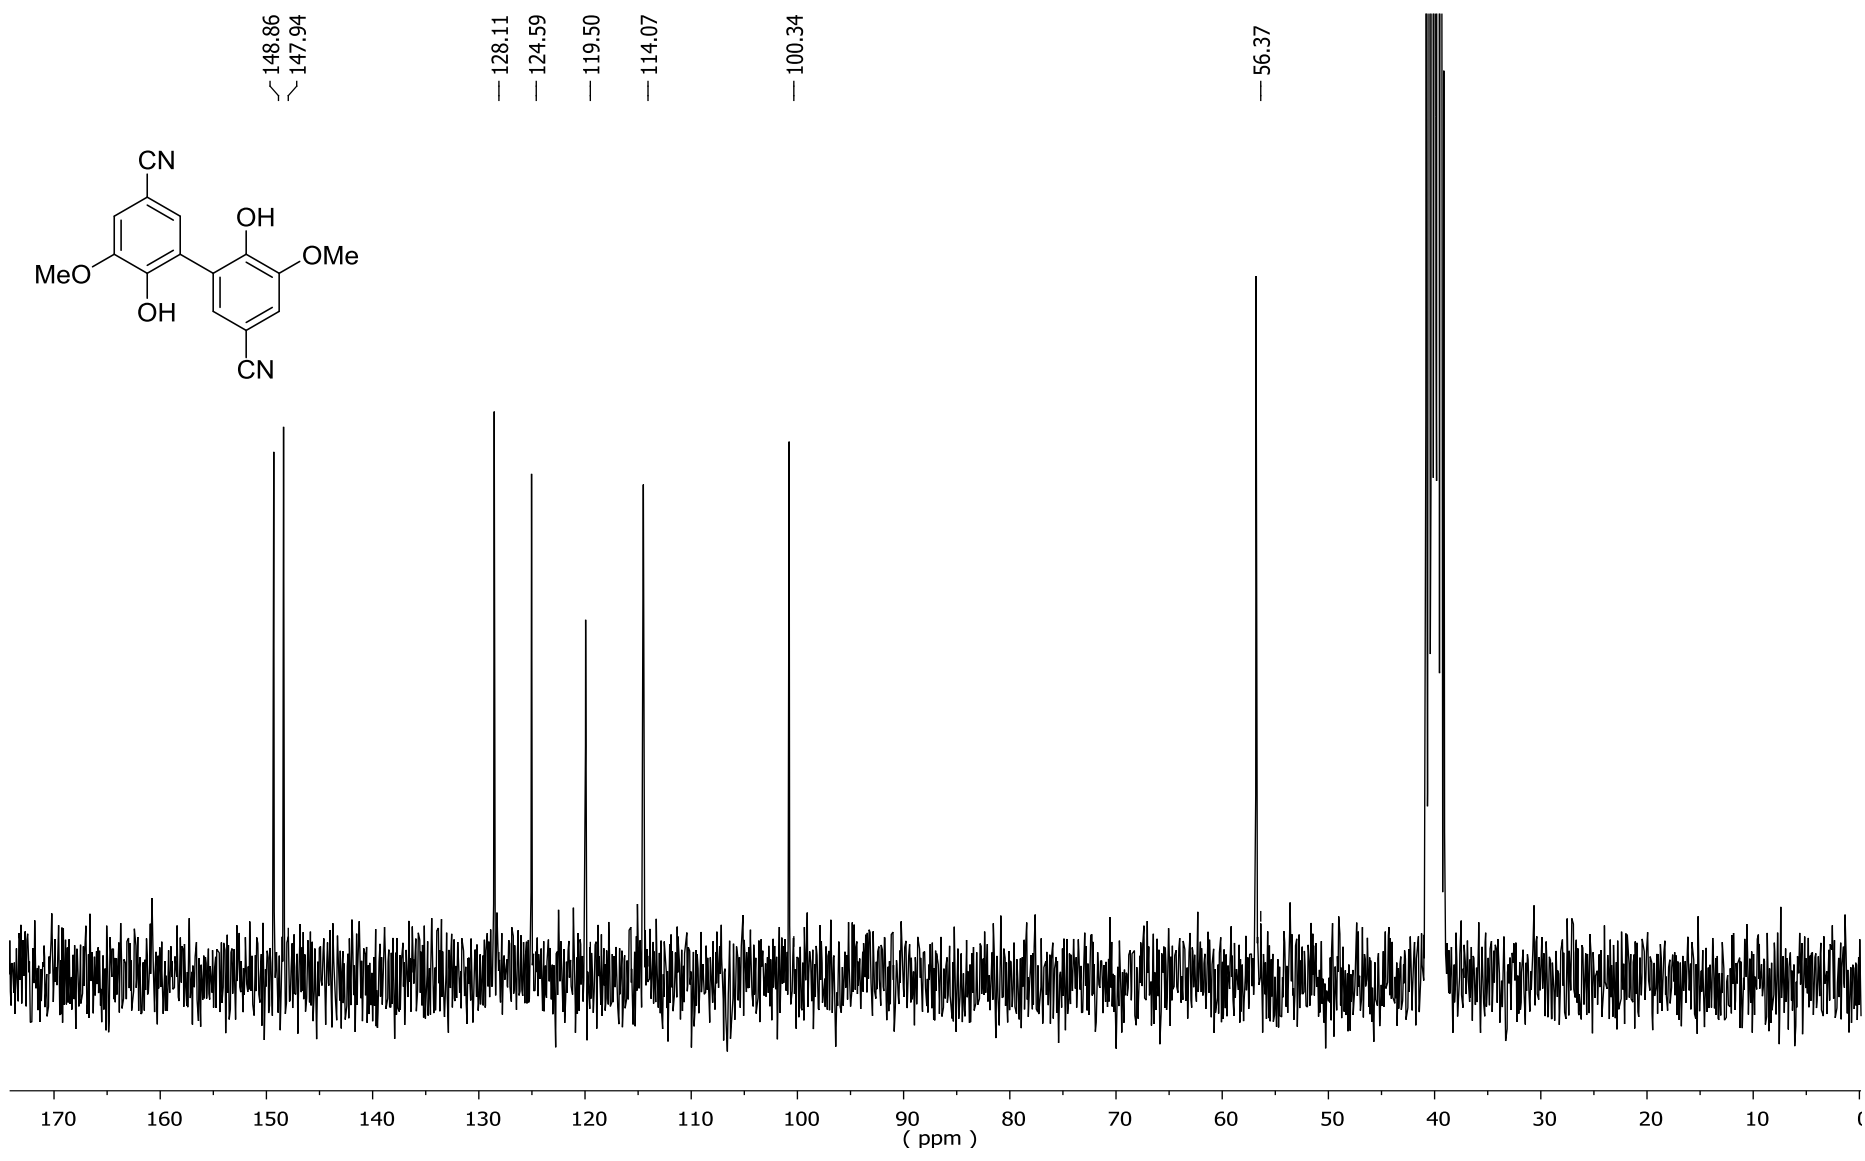

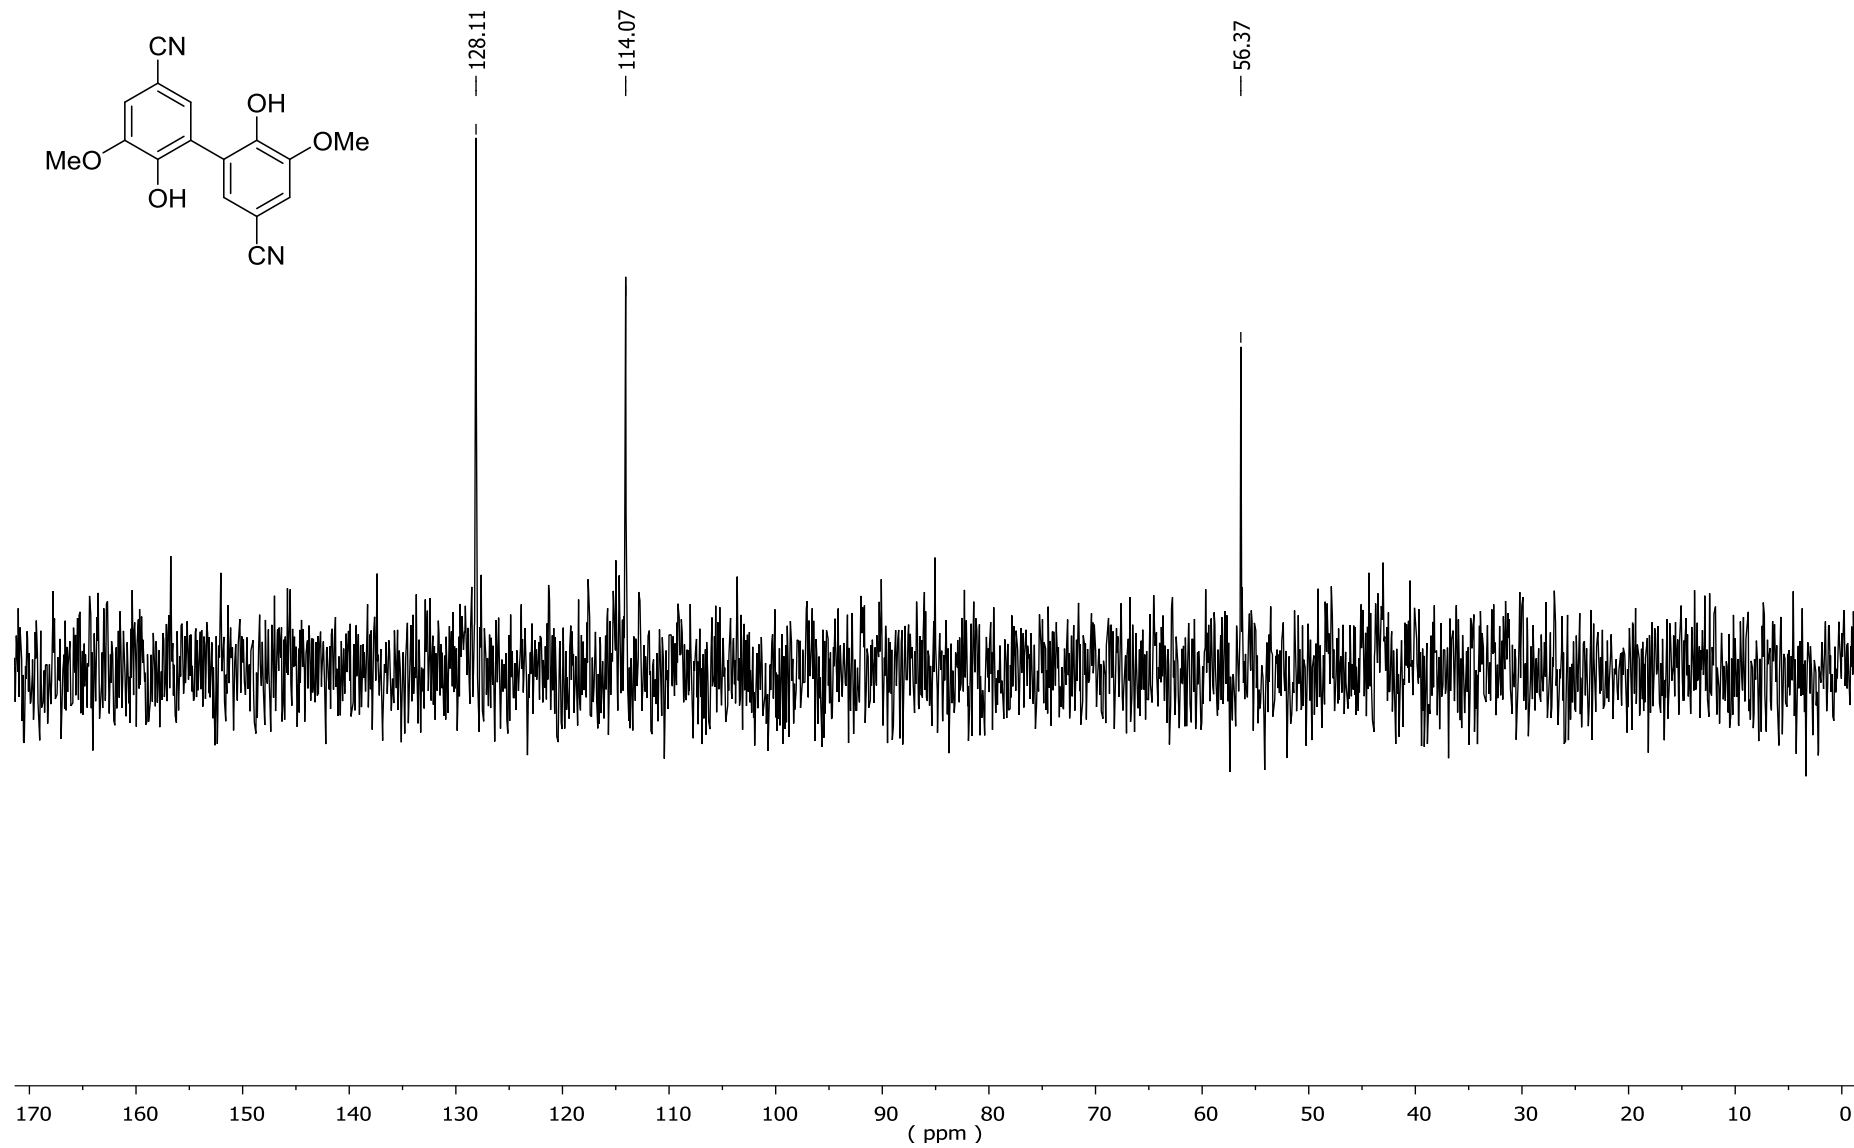

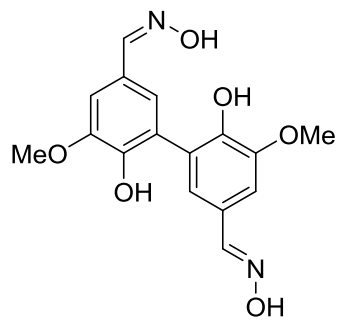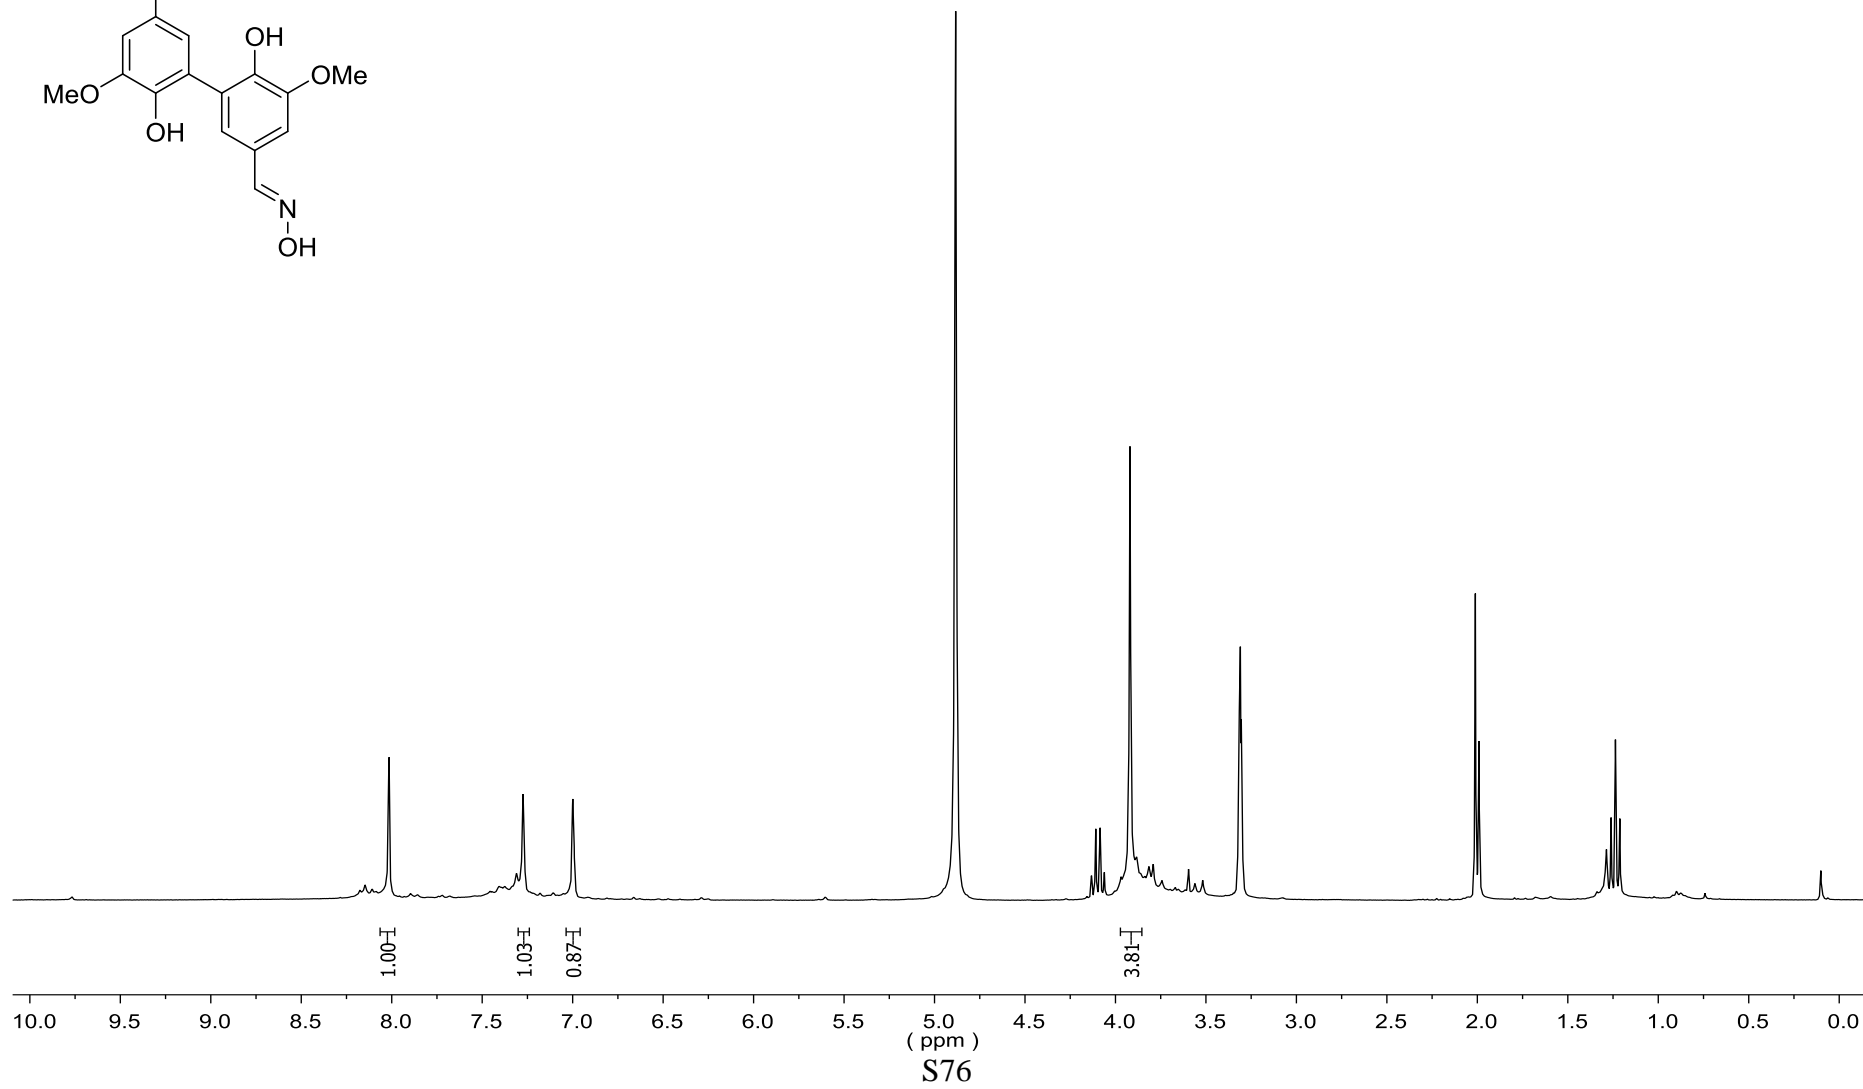

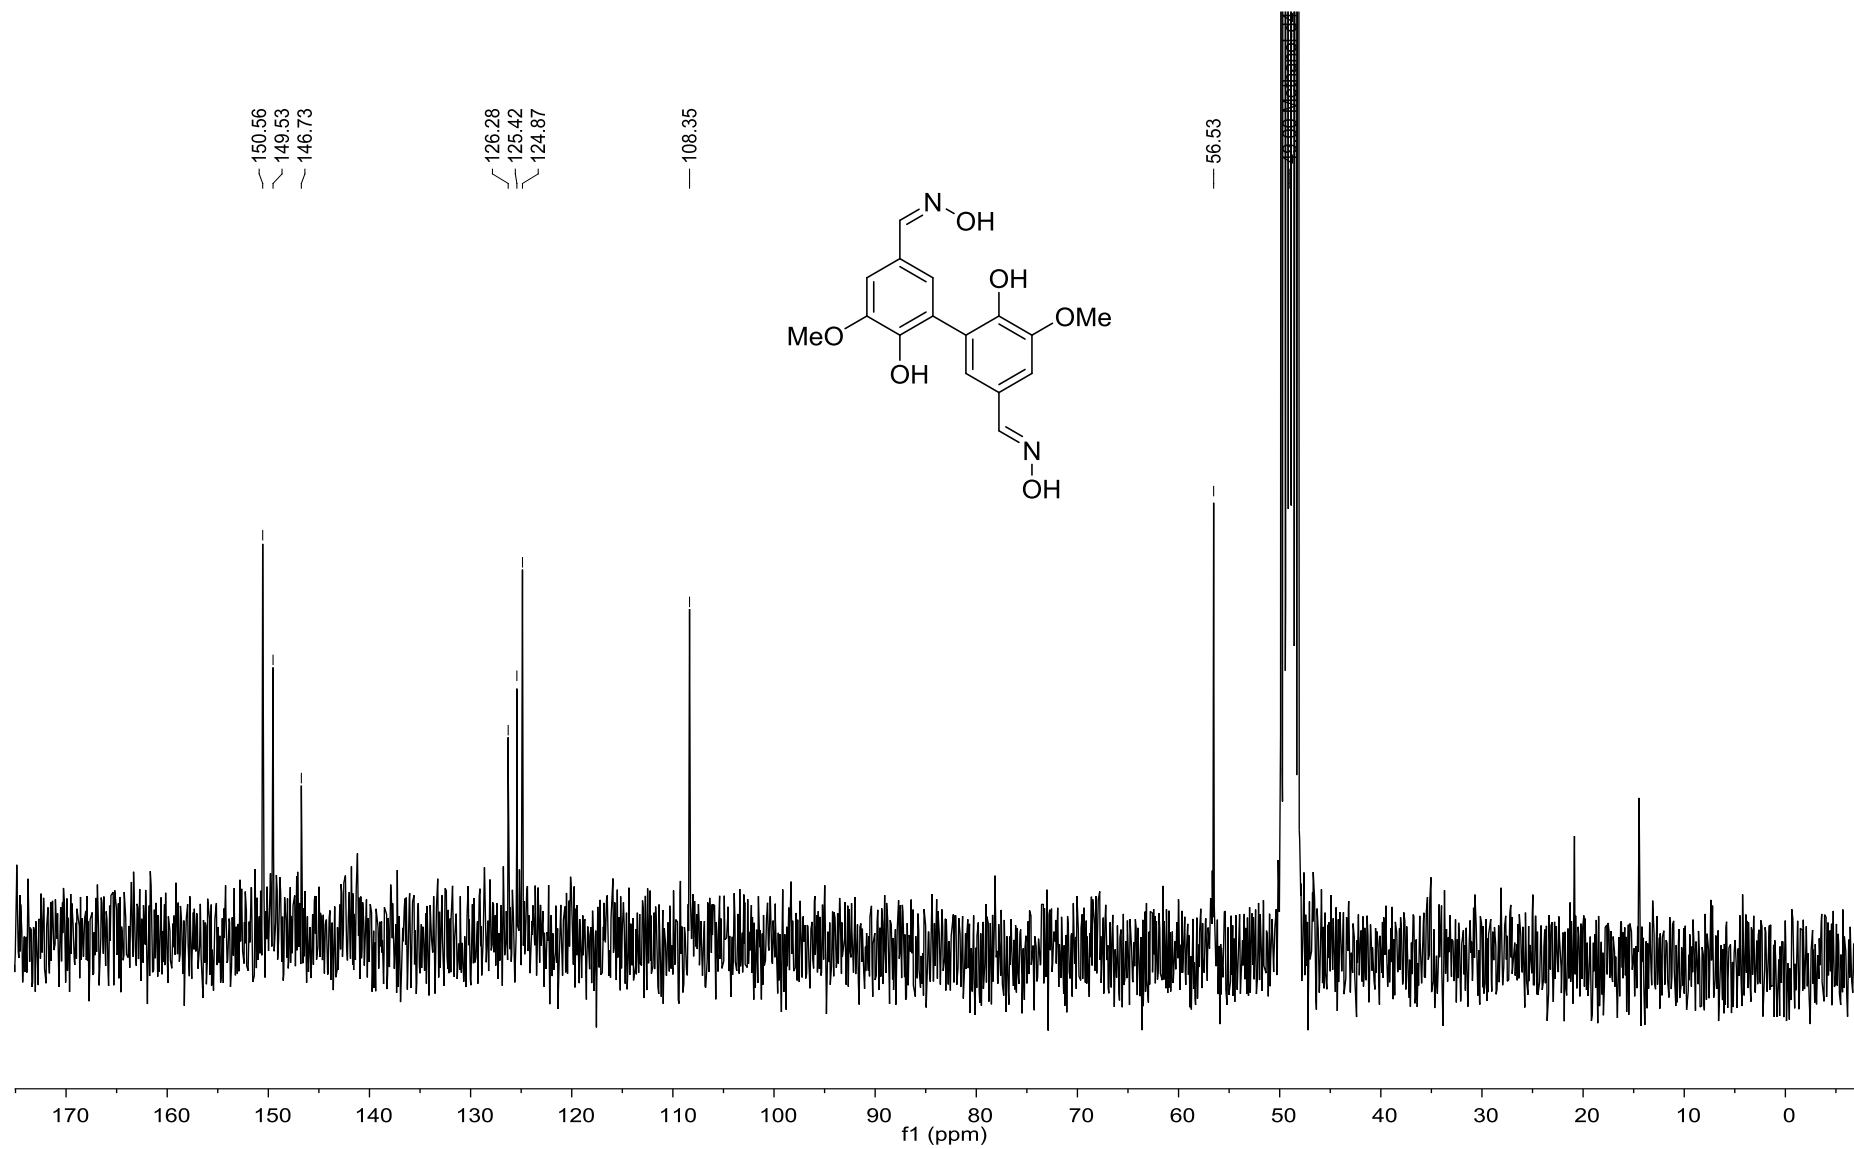

S77

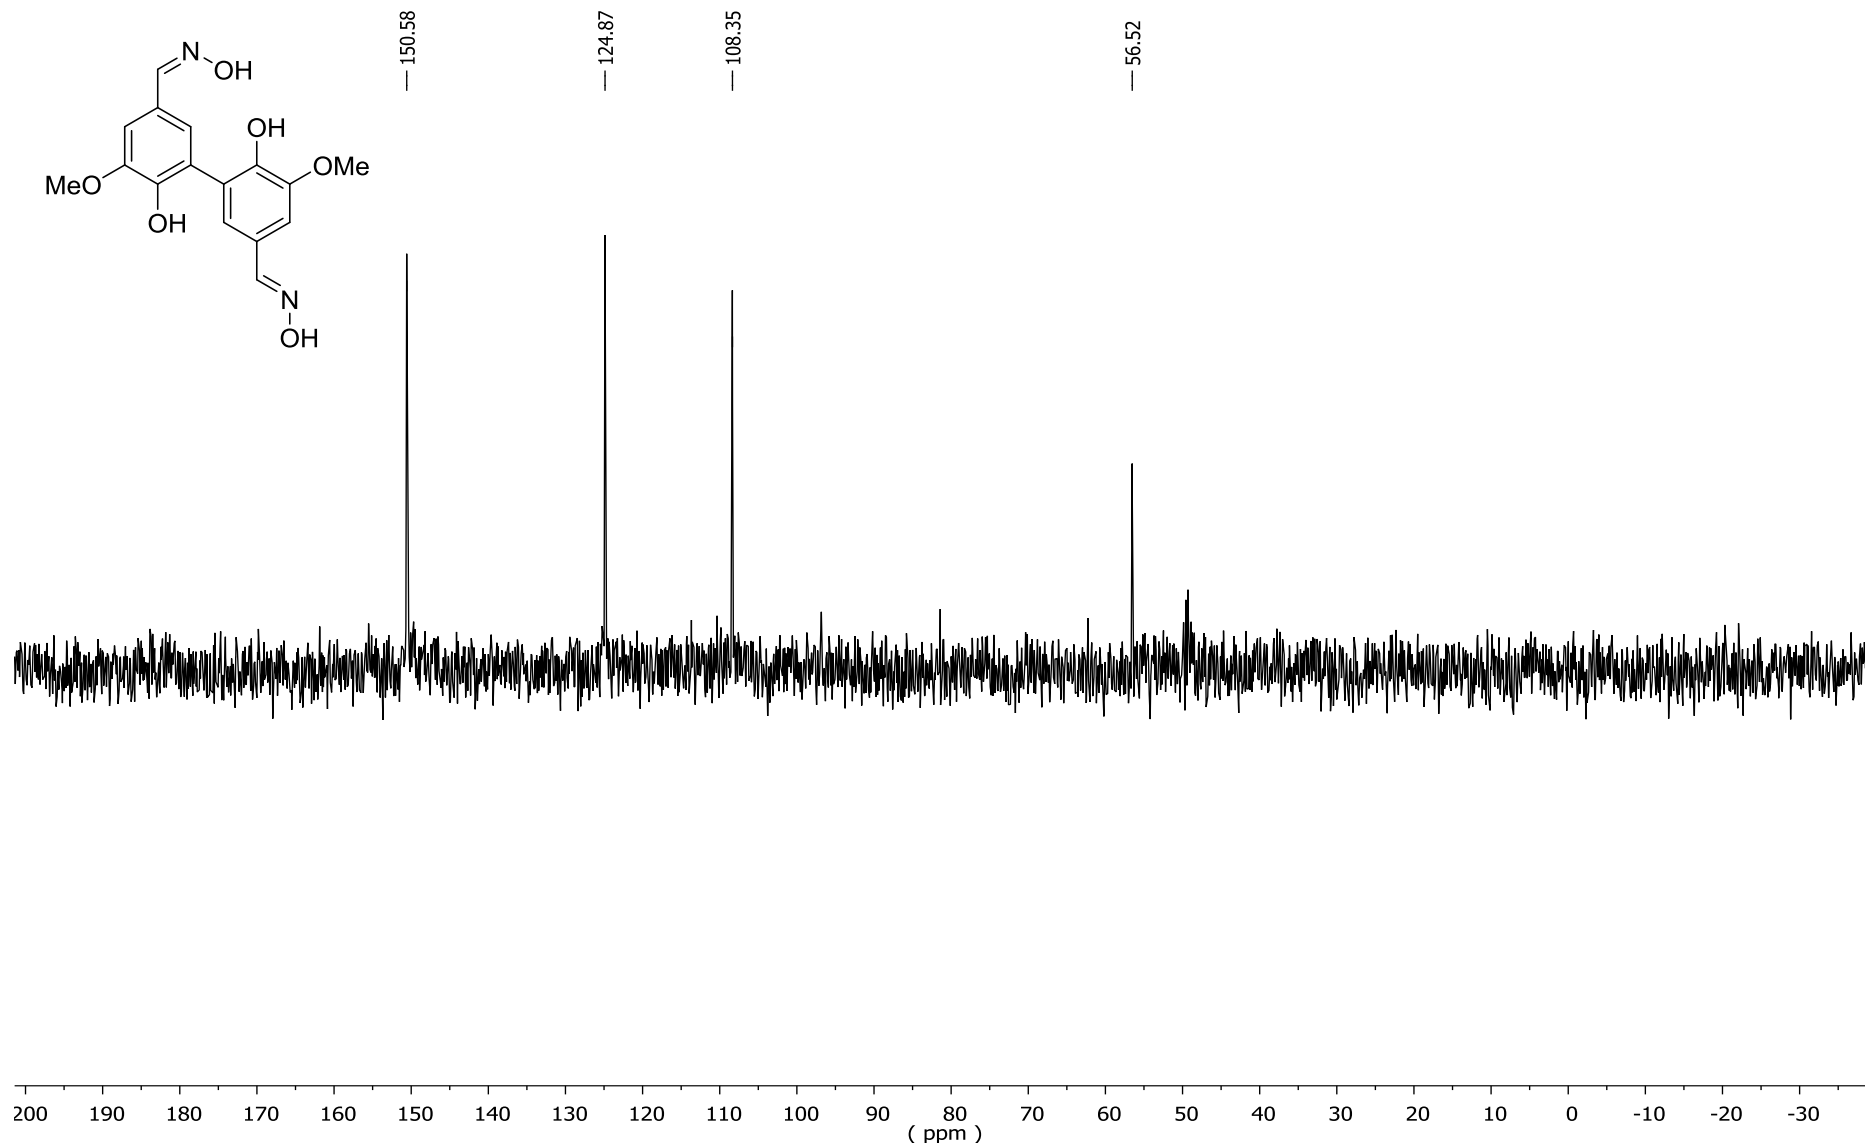

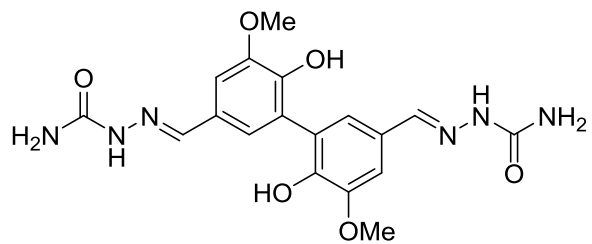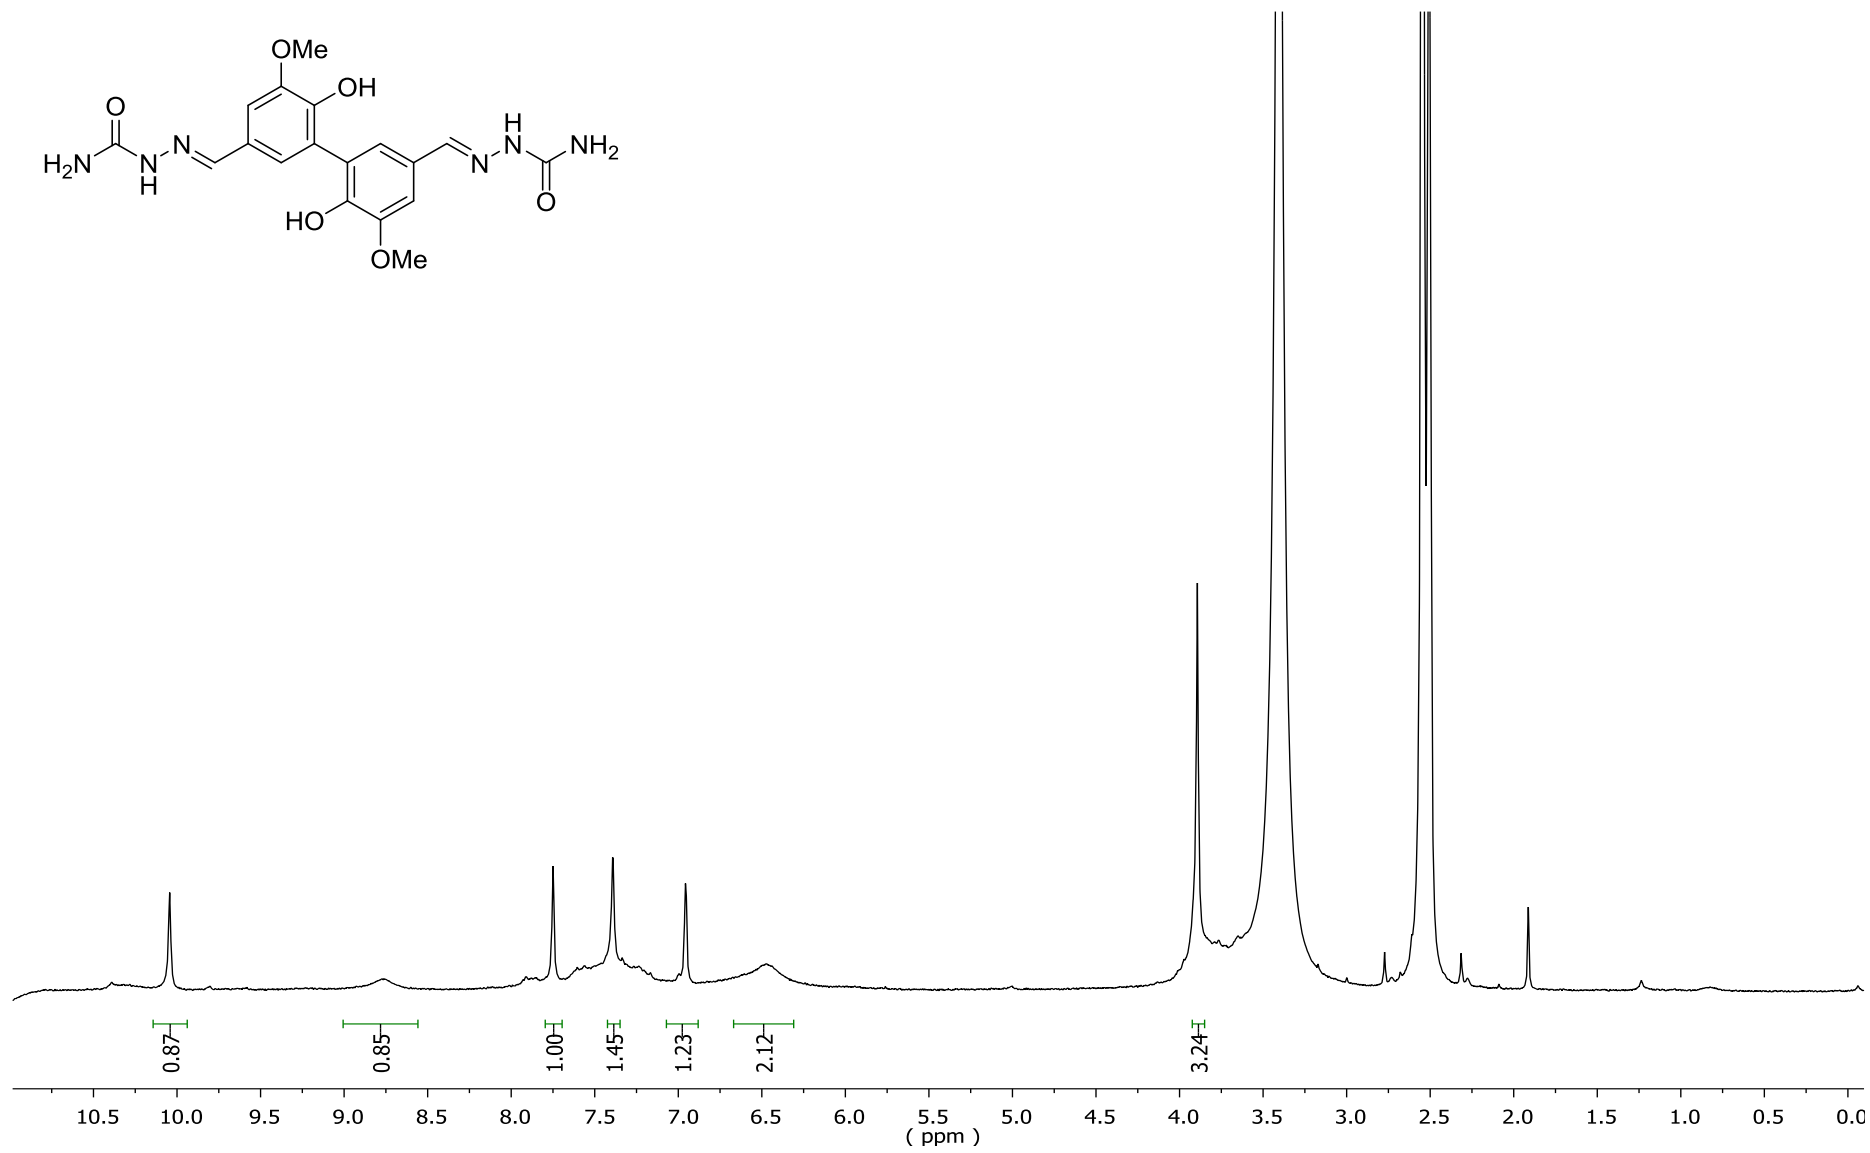

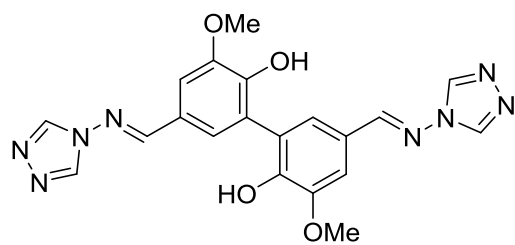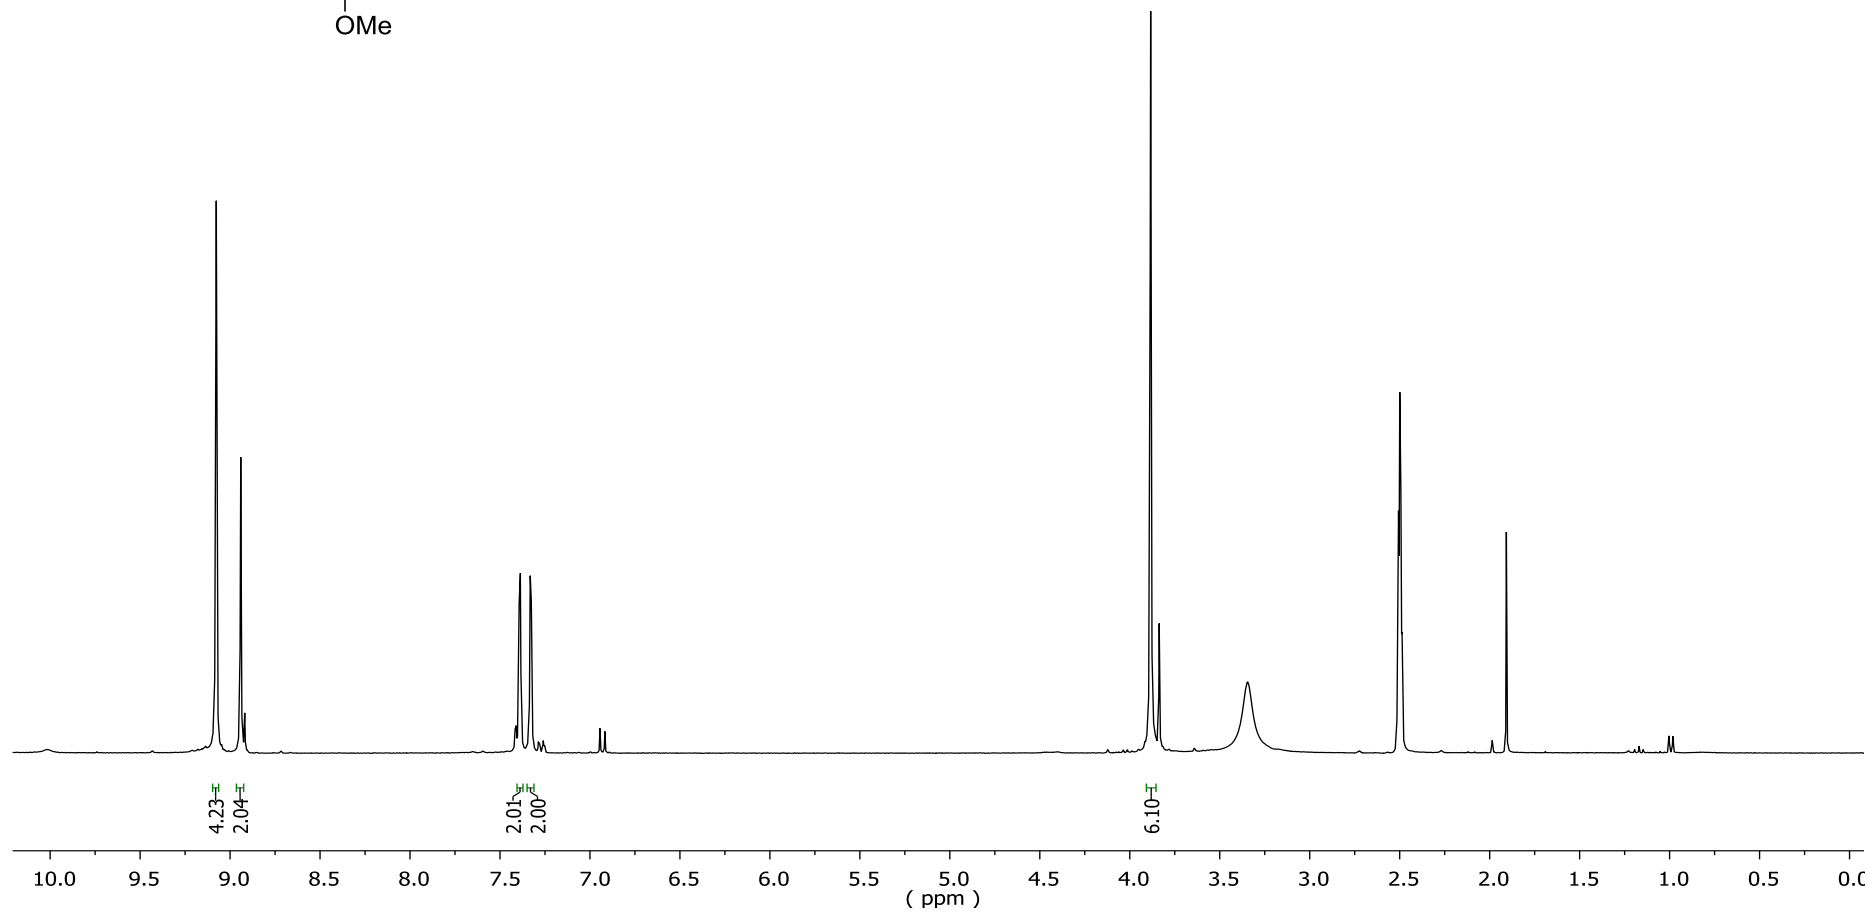



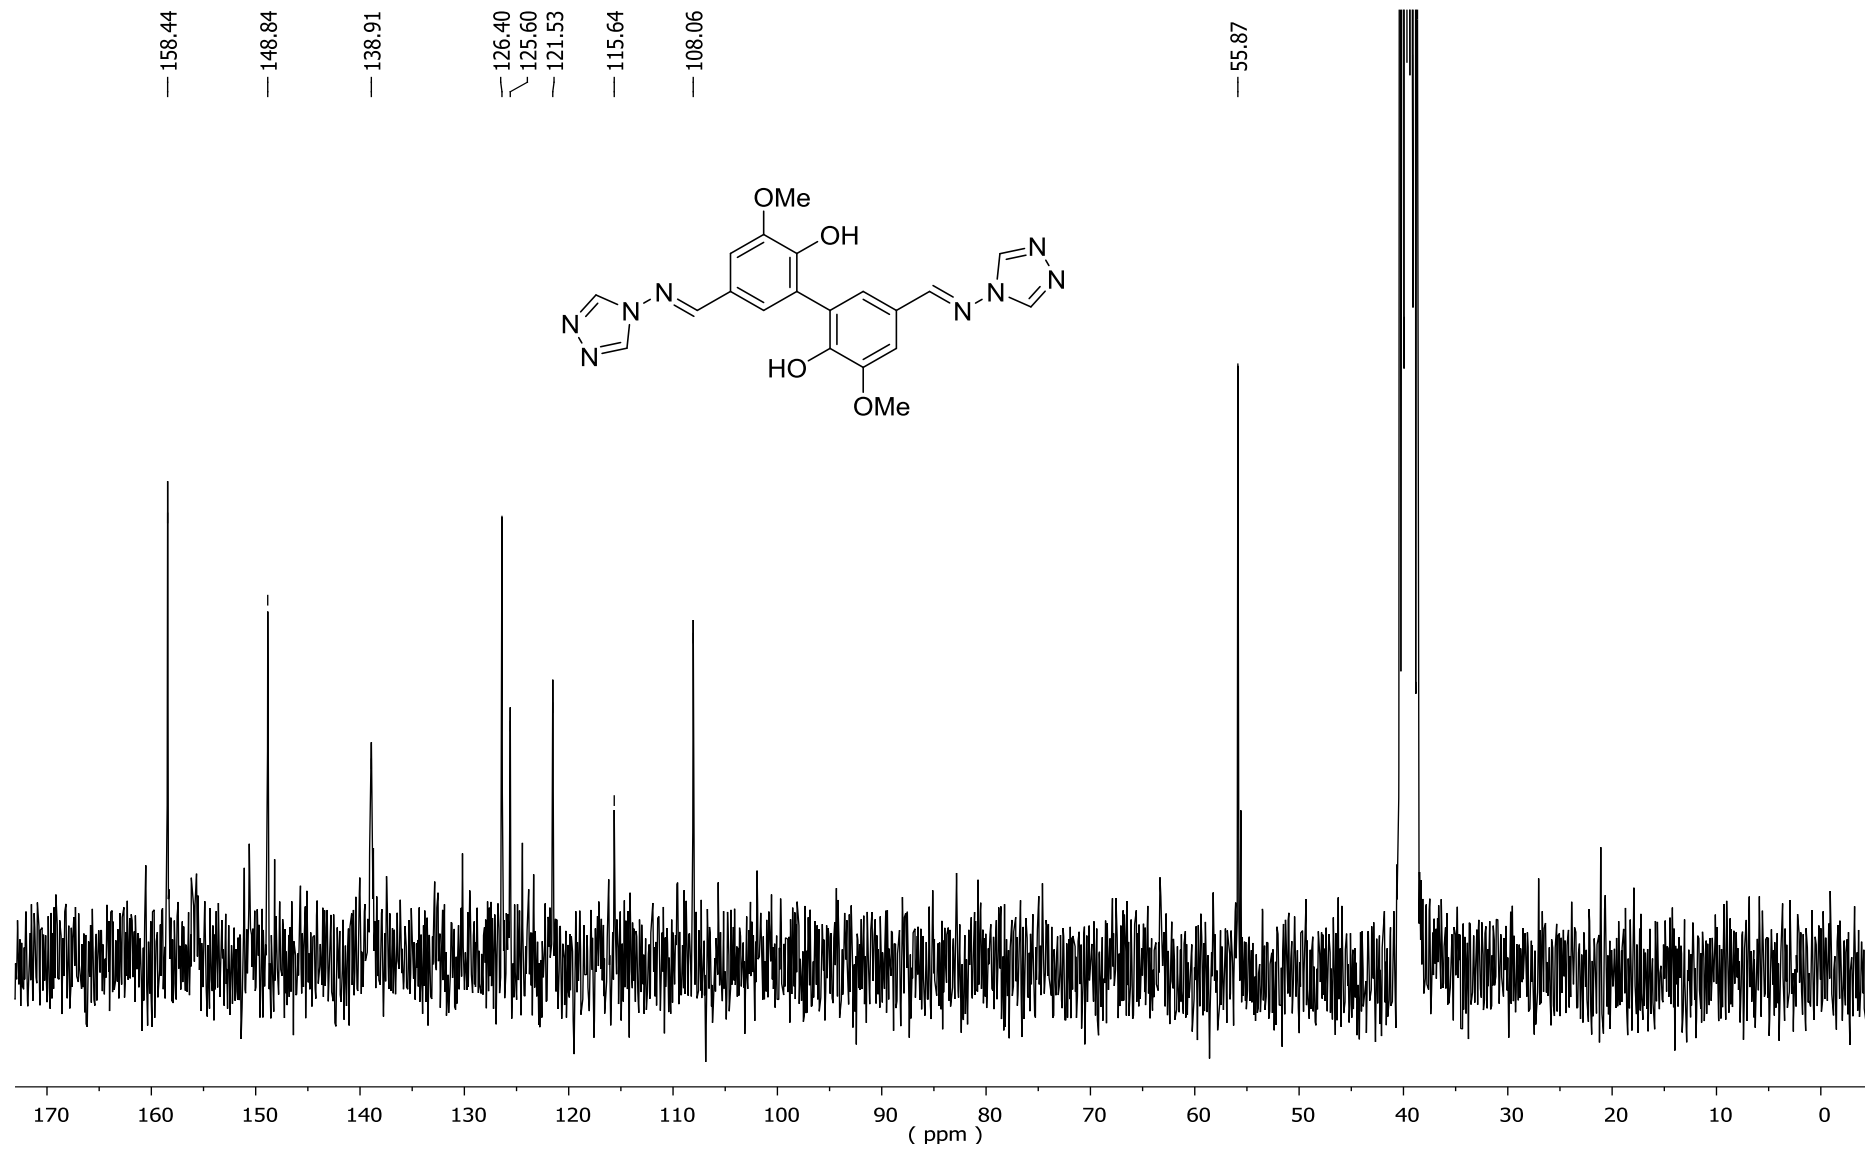

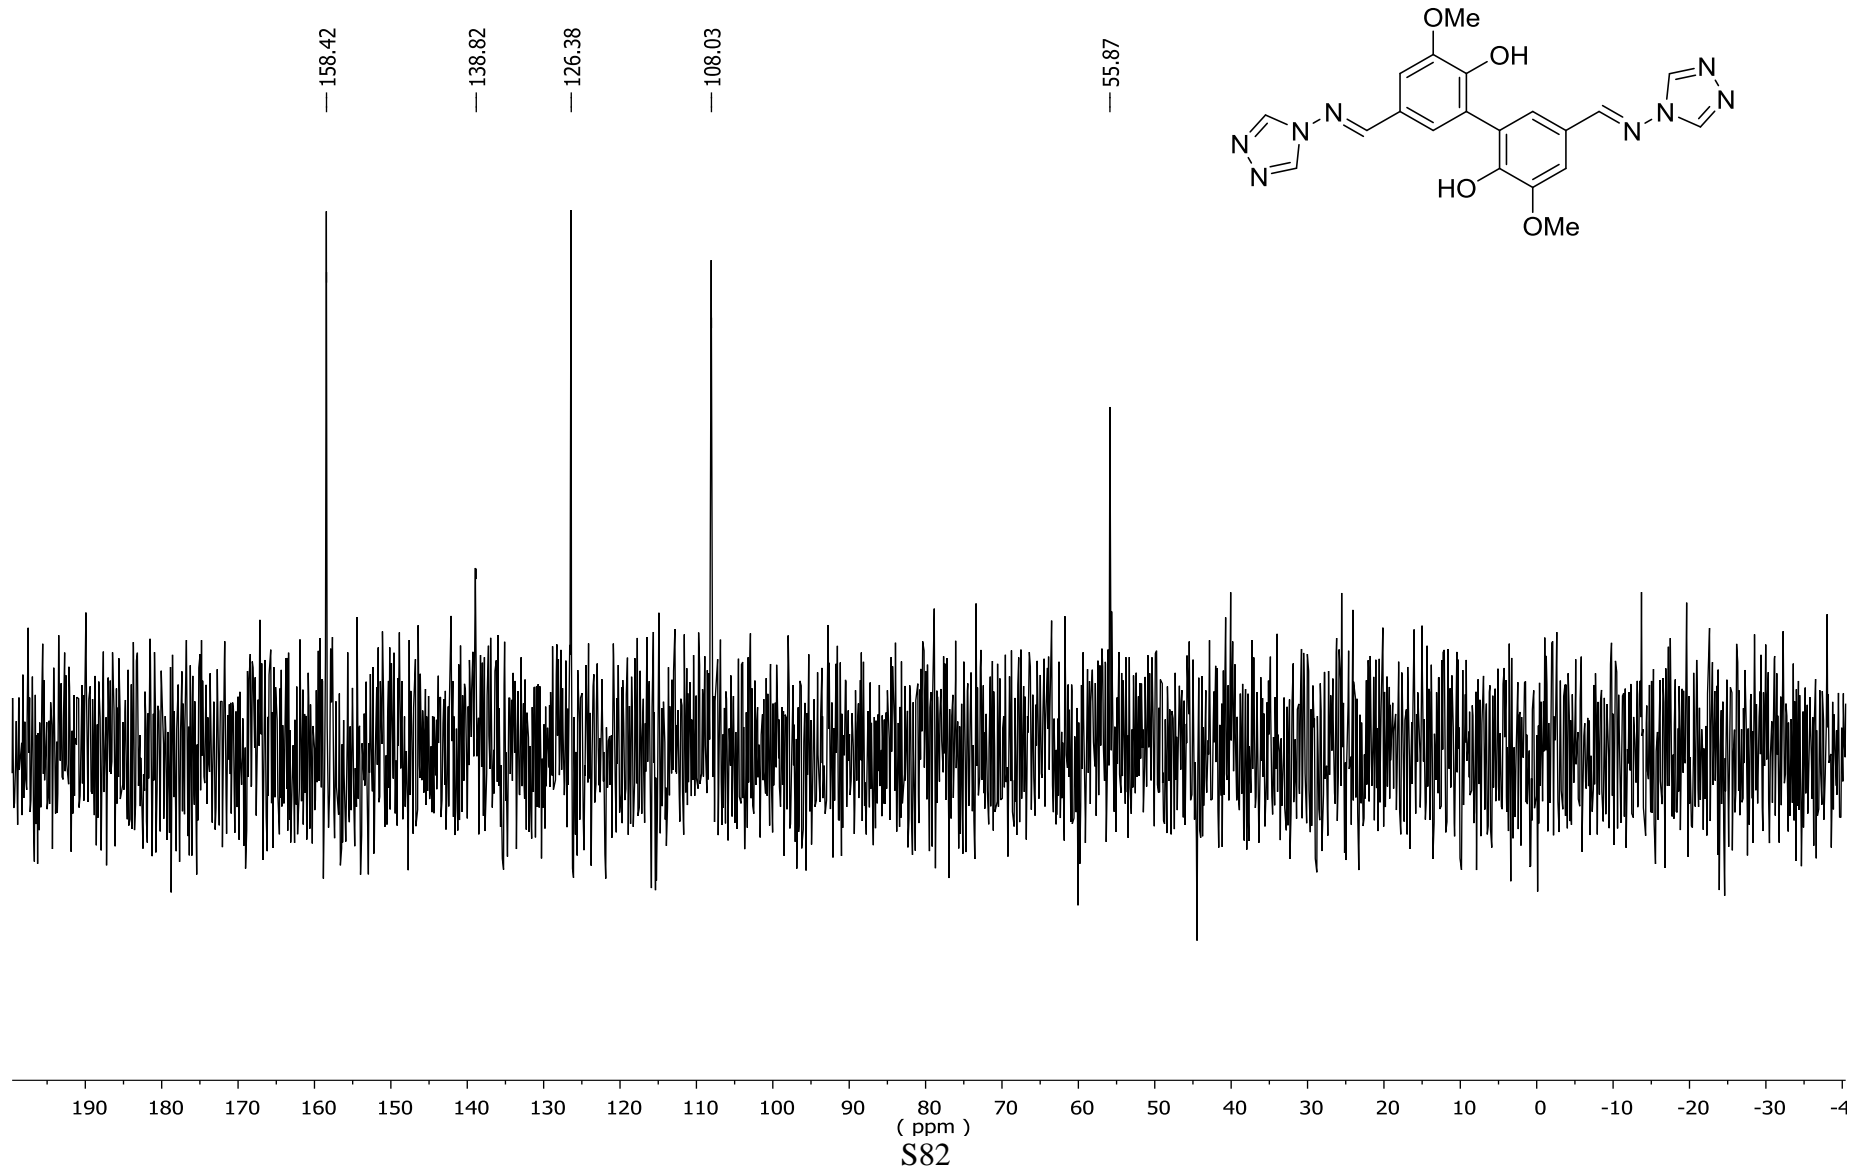

Supplement: c7ra10497a1.pdf [file c7ra10497a1.pdf]
